# Supplementary material
Source: PubMed Central journal article supplement (PMC2921183)
Supplement: NIHMS217156-supplement-S1.pdf [file NIHMS217156-supplement-S1.pdf]

## ***Table of Contents***

Supplemental Information S1. Spectral counts and retention time of the unmodified and modified peptides with novel mass shifts.

Supplemental Information S2. MS/MS spectra of the peptides containing K<sup>Prop</sup> and K<sup>Buty</sup>

Supplemental Information S3. MS/MS spectra of the modified peptides from yeast histone H3

Supplemental Information S4. MS/MS spectra of the modified peptides from yeast histone H4

Supplemental Information S5. MS/MS Spectra of the modified peptides from yeast histone H2B.

**Supplemental Information S1. Spectral counts and retention time of unmodified and modified peptides with novel mass shifts**

| Protein Names | Gi No.   | Positions | AAs | Sequence and mass shifts  | Spectral counts<br>(modified/unmodified) | Retention times (min)<br>(modified/unmodified) |
|---------------|----------|-----------|-----|---------------------------|------------------------------------------|------------------------------------------------|
| H3            | 48428921 | 57        | S   | K.S(+83)TELLIR.K          | 1/128                                    | 46.55/56.80                                    |
| H3            | 48428921 | 57        | S   | K.S(+96)TELLIR.K          | 2/128                                    | 65.69/41.23                                    |
| H3            | 48428921 | 68        | Q   | R.KLPFQ(+1)R.L            | 2/35                                     | 34.30/57.43                                    |
| H3            | 48428921 | 73, 79    | E   | R.E(+42)IAQDFK(+42)TDLR.F | 1/52                                     | 63.39/44.65                                    |
| H3            | 48428921 | 79        | K   | R.EIAQDFK(+98)TDLR.F      | 2/52                                     | 63.59/44.65                                    |
| H3            | 48428921 | 19, 23    | Q   | R.KQ(+1)LASK(+42)AAR.K    | 1/21                                     | 10.92/9.77                                     |
| H4            | 122107   | 25        | D   | R.D(+42)NIQGITKPAIR.R     | 1/22                                     | 82.91/32.65                                    |
| H4            | 122107   | 27        | Q   | R.DNIQ(+1)GITKPAIR.R      | 3/22                                     | 41.25/38.65                                    |
| H4            | 122107   | 31        | K   | R.DNIQGITK(-19)PAIR.R     | 7/22                                     | 48.49/38.65                                    |
| H4            | 122107   | 35        | R   | R.DNIQGITKPAIR(+74).R     | 1/22                                     | 36.63/38.65                                    |
| H4            | 122107   | 35        | N   | R.DN(-2)IQGITKPAIR.R      | 1/22                                     | 44.25/38.65                                    |
| H4            | 122107   | 35        | N   | R.DN(+1)IQGITKPAIR.R      | 1/22                                     | 42.57/38.65                                    |
| H4            | 122107   | 45        | R   | K.R(+53)ISGLIYEEVR.A      | 4/19                                     | 85.15/42.43                                    |
| H4            | 122107   | 47        | S   | R.IS(+12)GLIYEEVR.A       | 1/29                                     | 57.50/48.04                                    |
| H4            | 122107   | 47        | S   | R.IS(+26)GLIYEEVR.A       | 2/29                                     | 58.22/48.04                                    |
| H4            | 122107   | 51        | E   | R.ISGLIYE(+74)EVR.A       | 1/29                                     | 46.02/48.04                                    |
| H4            | 122107   | 58        | K   | R.AVLK(-19)SFLESVIR.D     | 3/19                                     | 77.84/50.94                                    |
| H4            | 122107   | 59        | S   | K.S(+81)FLESVIR.D         | 2/19                                     | 56.45/50.94                                    |
| H4            | 122107   | 59        | S   | K.S(+68)FLESVIR.D         | 1/19                                     | 54.51/50.94                                    |
| H4            | 122107   | 63        | E   | R.DSVTYTE(+28)HAK.R       | 1/16                                     | 14.02/11.60                                    |
| H4            | 122107   | 68        | S   | R.DS(-2)VTYTEHAK.R        | 1/16                                     | 19.42/13.72                                    |

| Protein Names | Gi No. | Positions | AAs | Sequence and mass shifts           | Spectral counts<br>(modified/unmodified) | Retention times (min)<br>(modified/unmodified) |
|---------------|--------|-----------|-----|------------------------------------|------------------------------------------|------------------------------------------------|
| H4            | 122107 | 76        | K   | R.DSVTYTEHAKR <b>K(-19)</b> .T     | 1/19                                     | 15.13/13.65                                    |
| H4            | 122107 | 90        | K   | R.KTVTSLDVVYAL <b>K(-19)</b> R.Q   | 2/9                                      | 54.91/43.63                                    |
| H2B           | 403314 | 51        | S   | K. <b>S(+198)</b> MSILNSFVNDIFER.I | 2/114                                    | 94.24/72.16                                    |
| H2B           | 403314 | 51        | S   | K. <b>S(+174)</b> MSILNSFVNDIFER.I | 1/114                                    | 89.41/72.16                                    |
| H2B           | 403314 | 70        | N   | K.SMSILNSFV <b>N(+1)</b> DIFER.I   | 8/114                                    | 70.90/72.16                                    |
| H2B           | 403314 | 45        | K   | K.ETYSSYIY <b>K(-19)</b> VLK.Q     | 2/70                                     | 66.62/33.47                                    |

**Supplemental Information S2. MS/MS spectra of the peptides containing K<sup>Prop</sup> and K<sup>Buty</sup>**

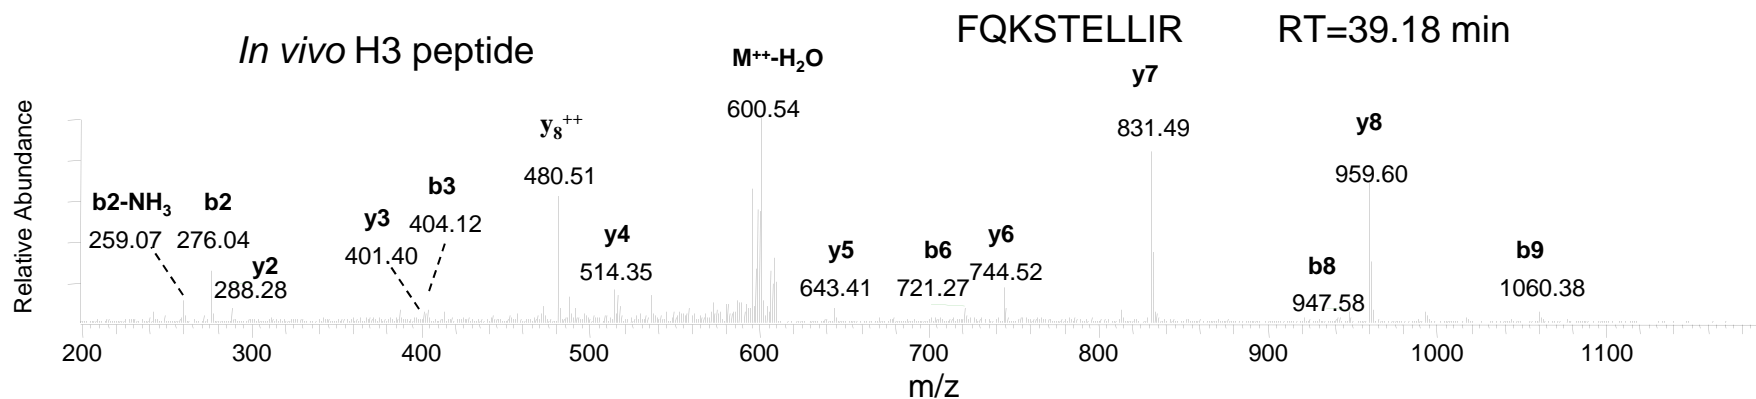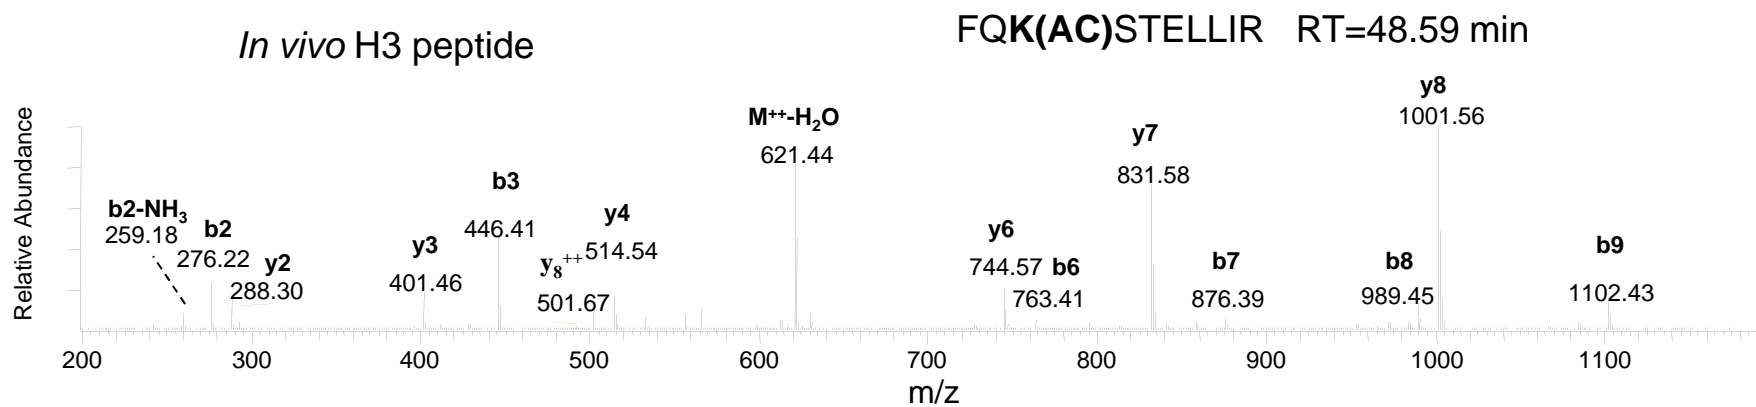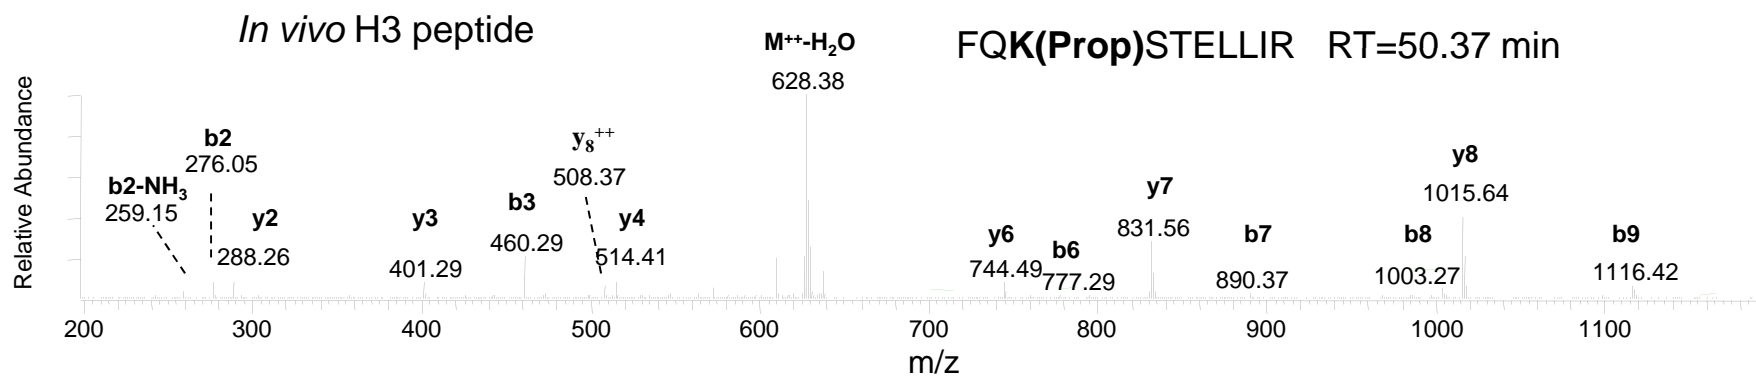

*In vivo* H3 peptide

STGGK(Ac)APR RT=7.44 min

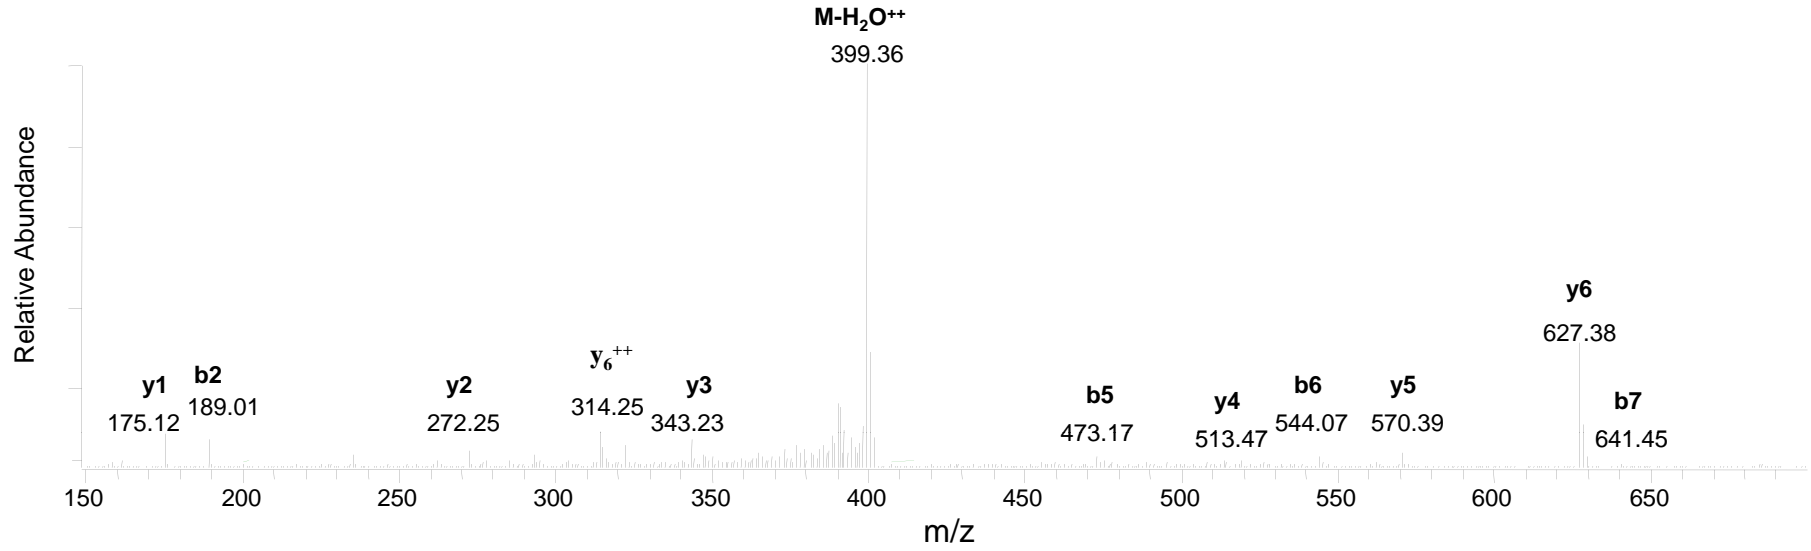

*In vivo* H3 peptide

STGGK(Buty)APR RT=12.90 min

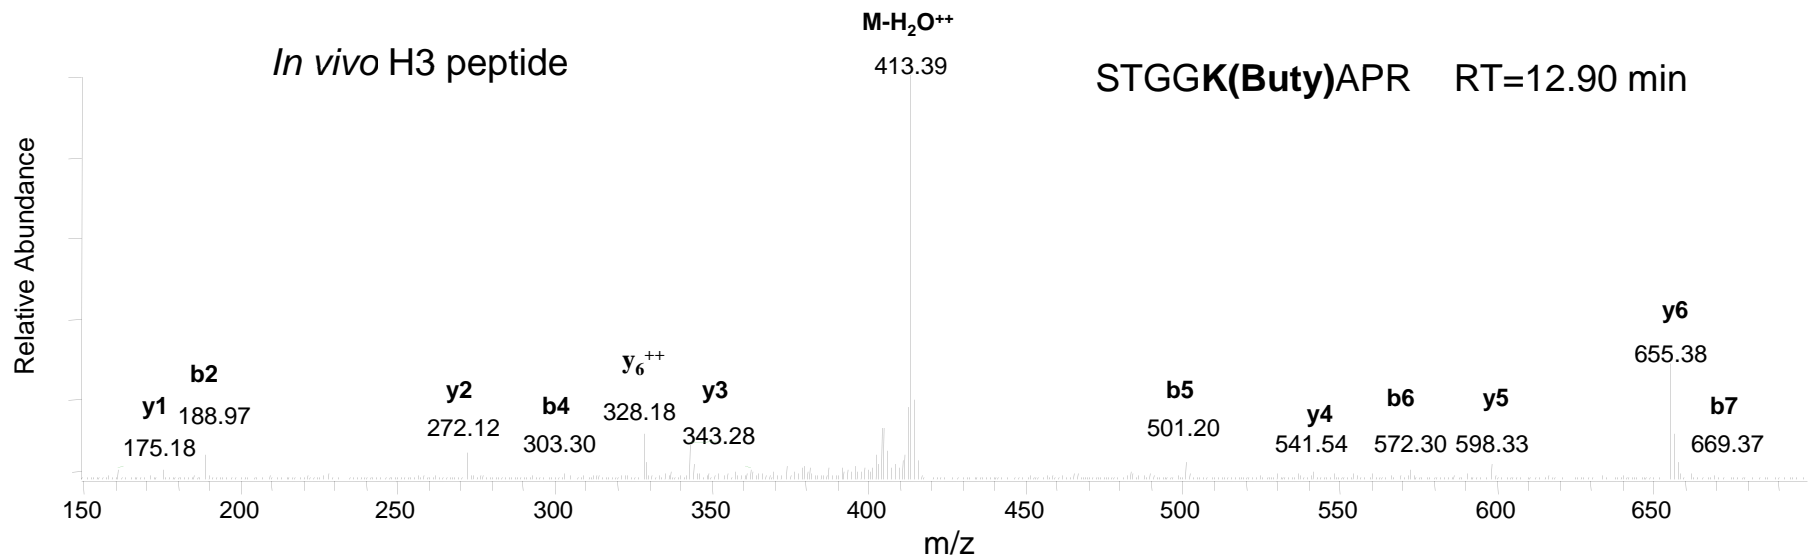

*In vivo* H3 peptide

KQLASK(Prop)AAR

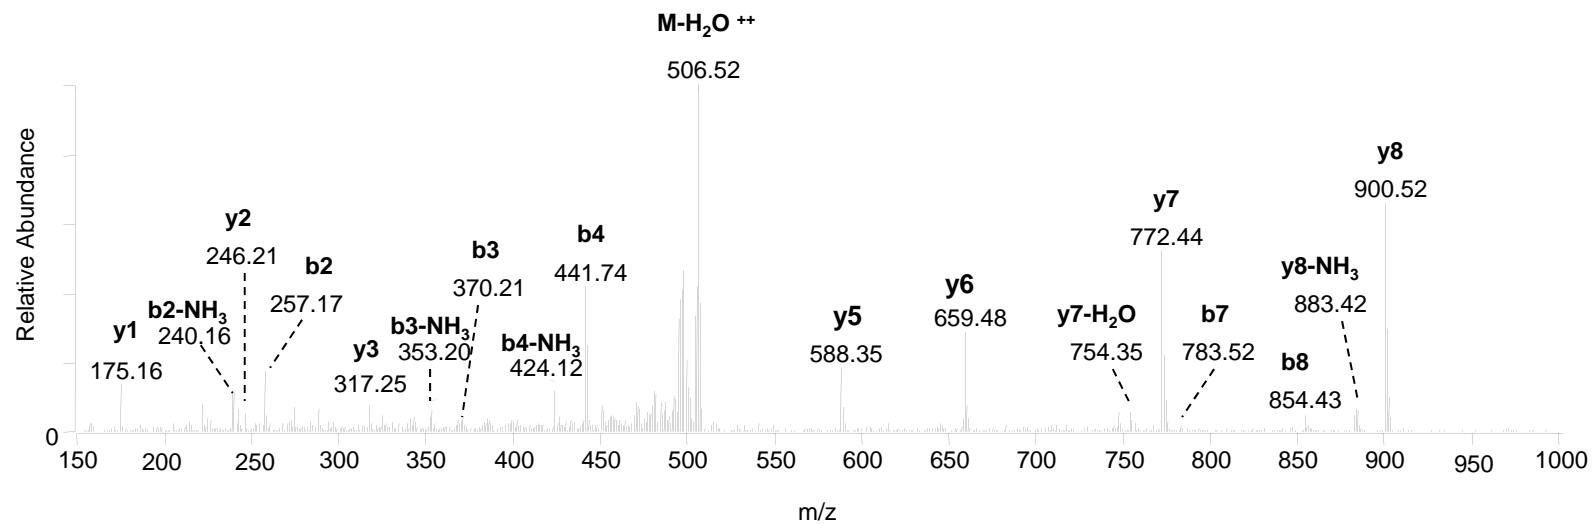

*In vivo* H3 peptide

**K(Buty)SAPSTGGVK(di-Me)KPHR**

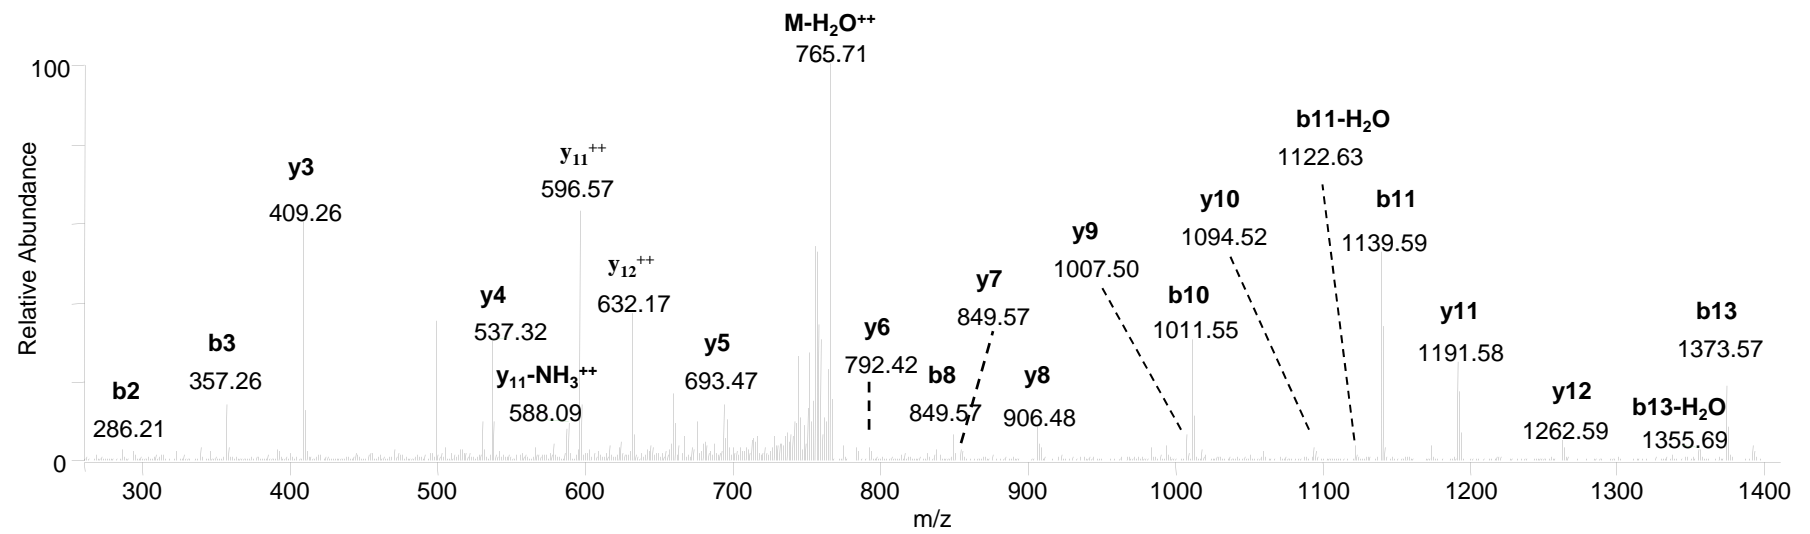



*In vivo* H4 peptide

GGK(**Buty**)GLGK

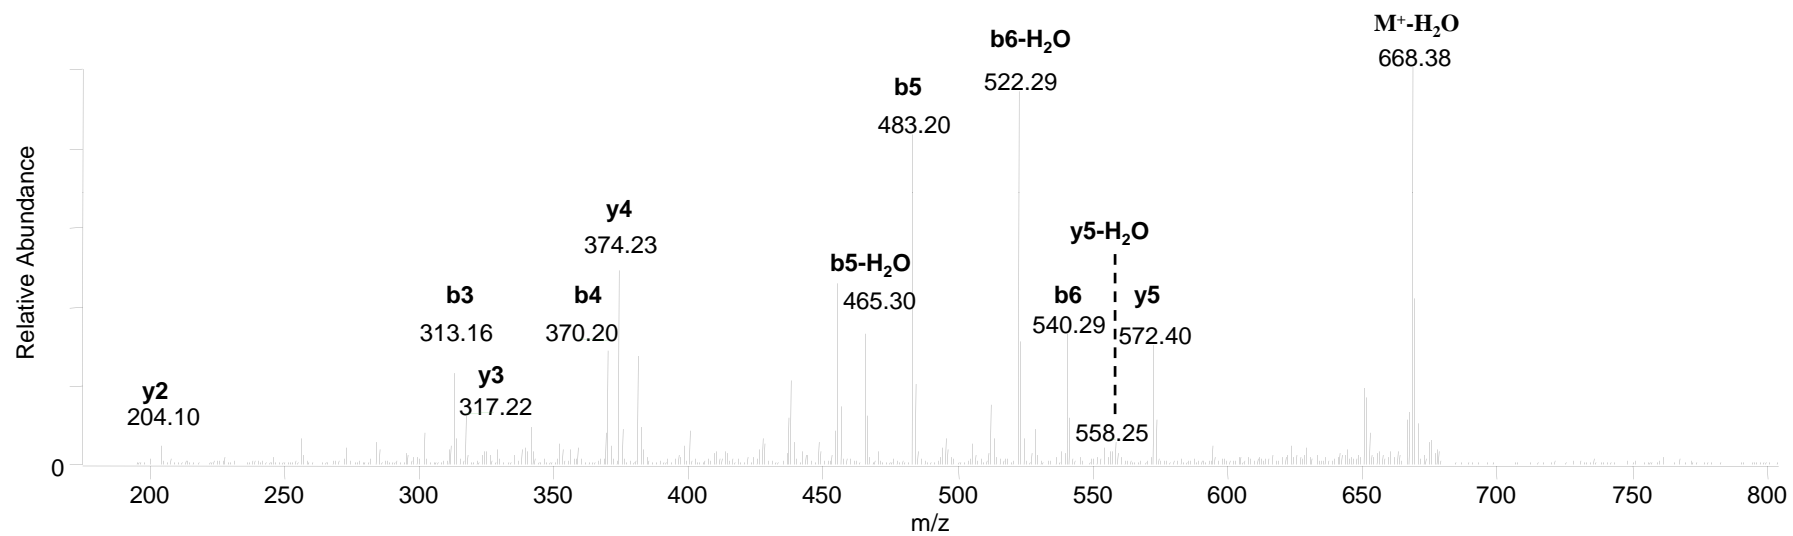

*In vivo* H2B peptide

APAE **K(Ac)** KPAA **K(Buty)** **K(Me)** TSTSVDGK

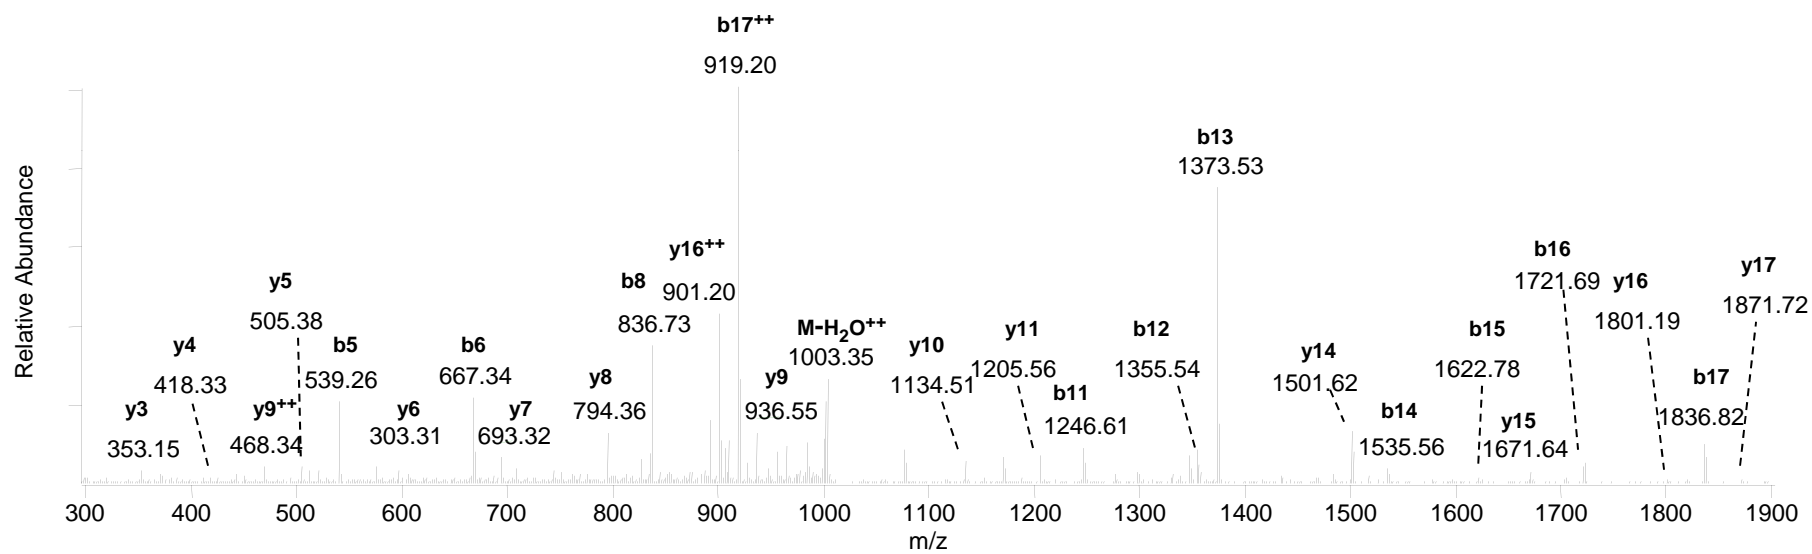

**Supplemental Information S3. MS/MS spectra of the modified peptides from yeast histone H3.**

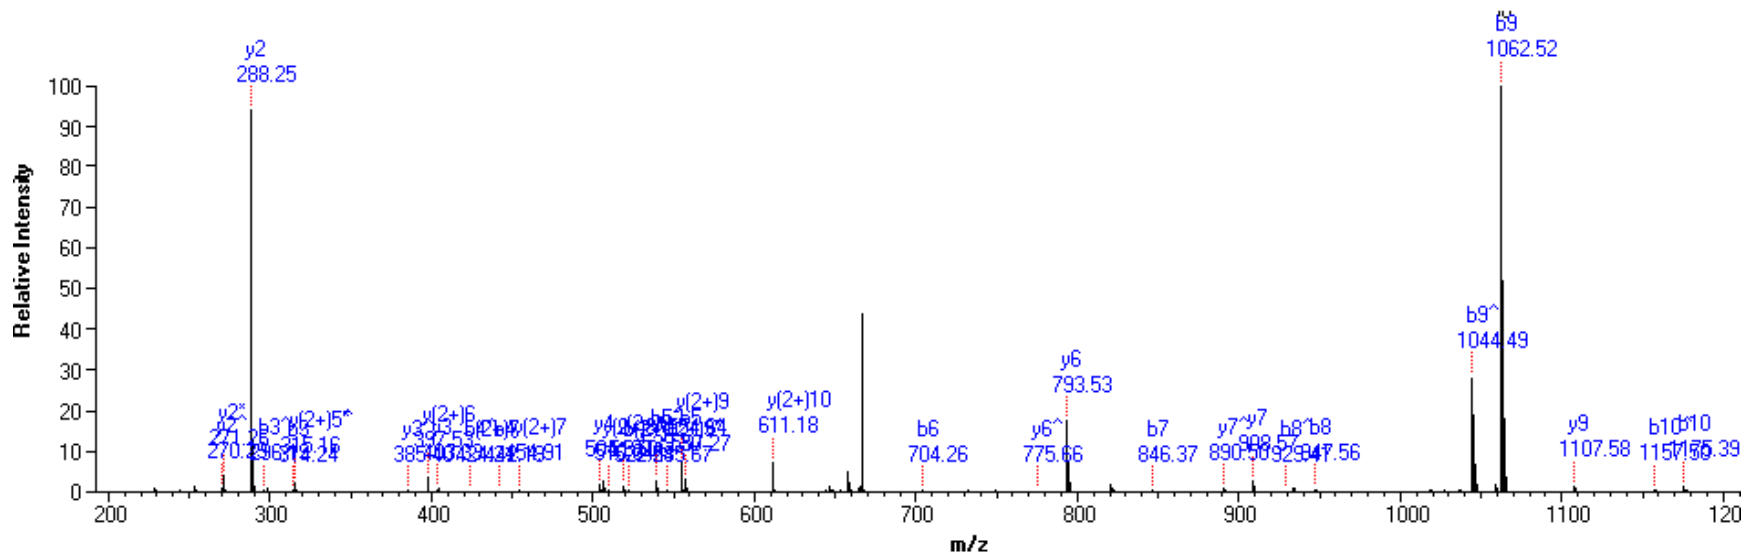

EIAQDFK(+14)TDLR

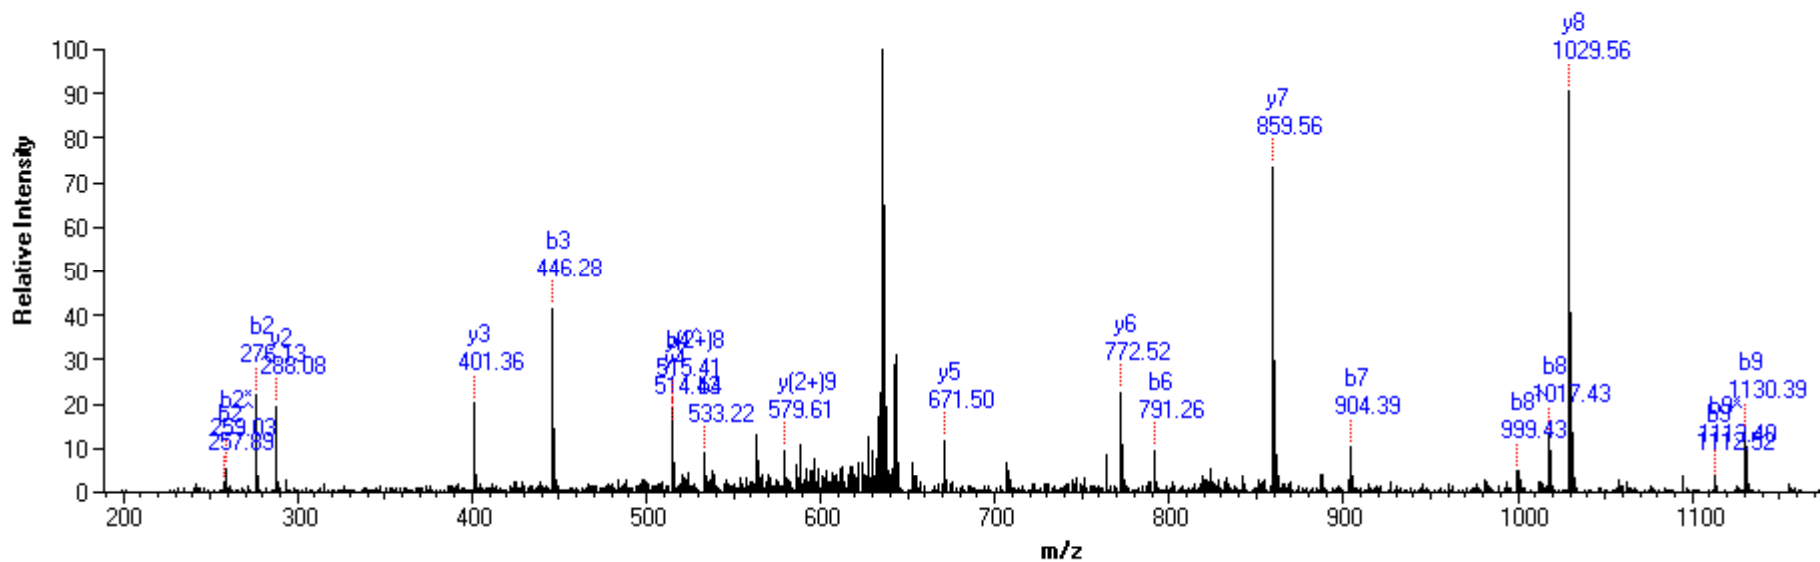

FQK(+42)STE(+28)LLIR

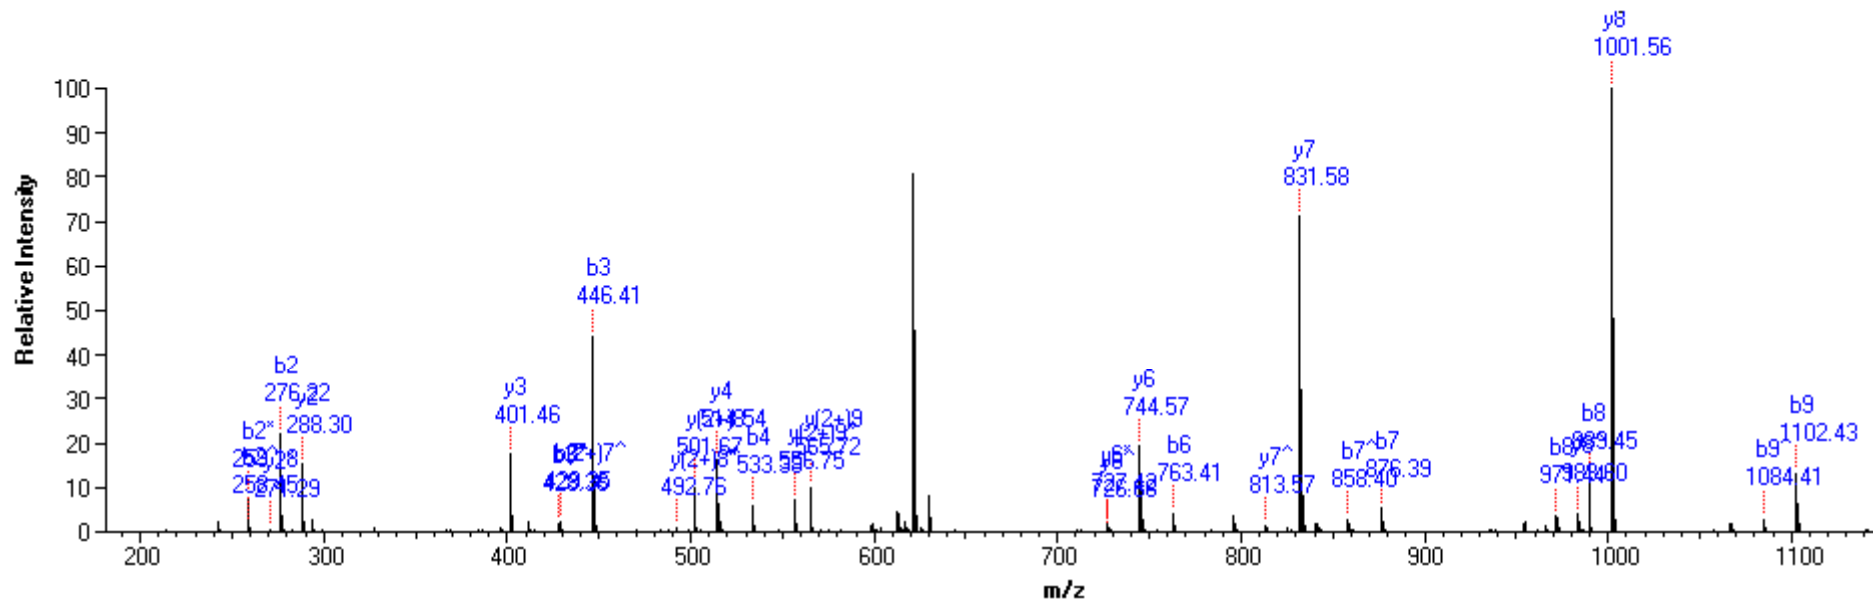

FQK(+42)STELLIR

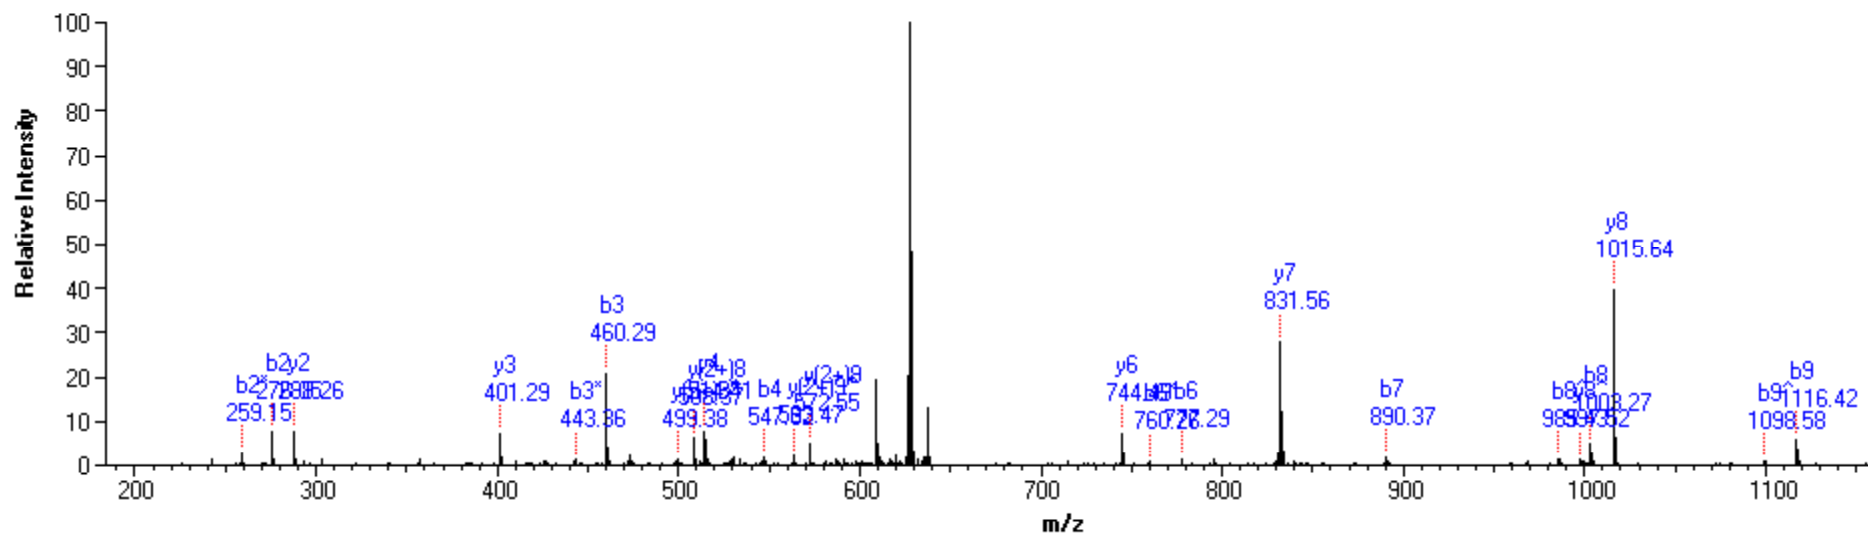

FQK(+56)STELLIR

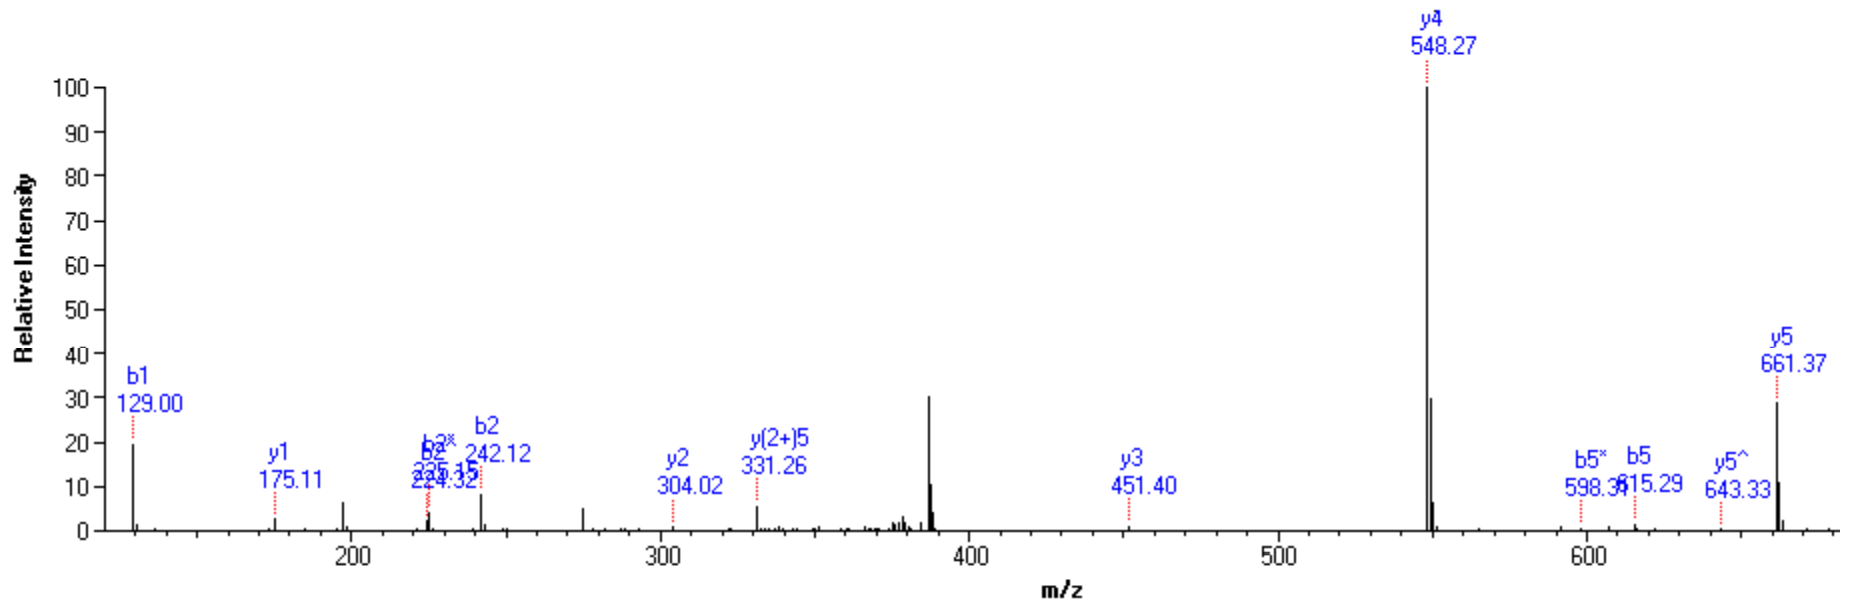

KLPFQ(+1)R

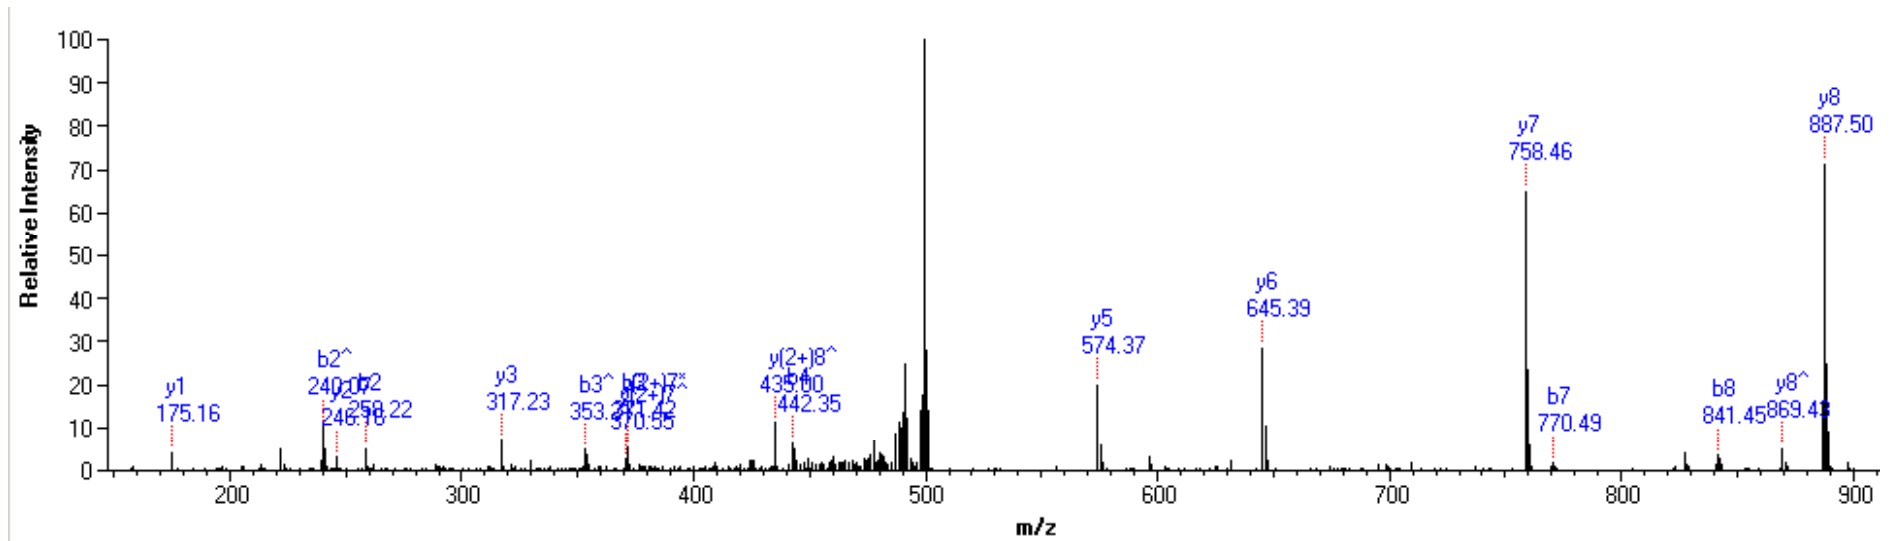

KQ(+1)LASK(+42)AAR

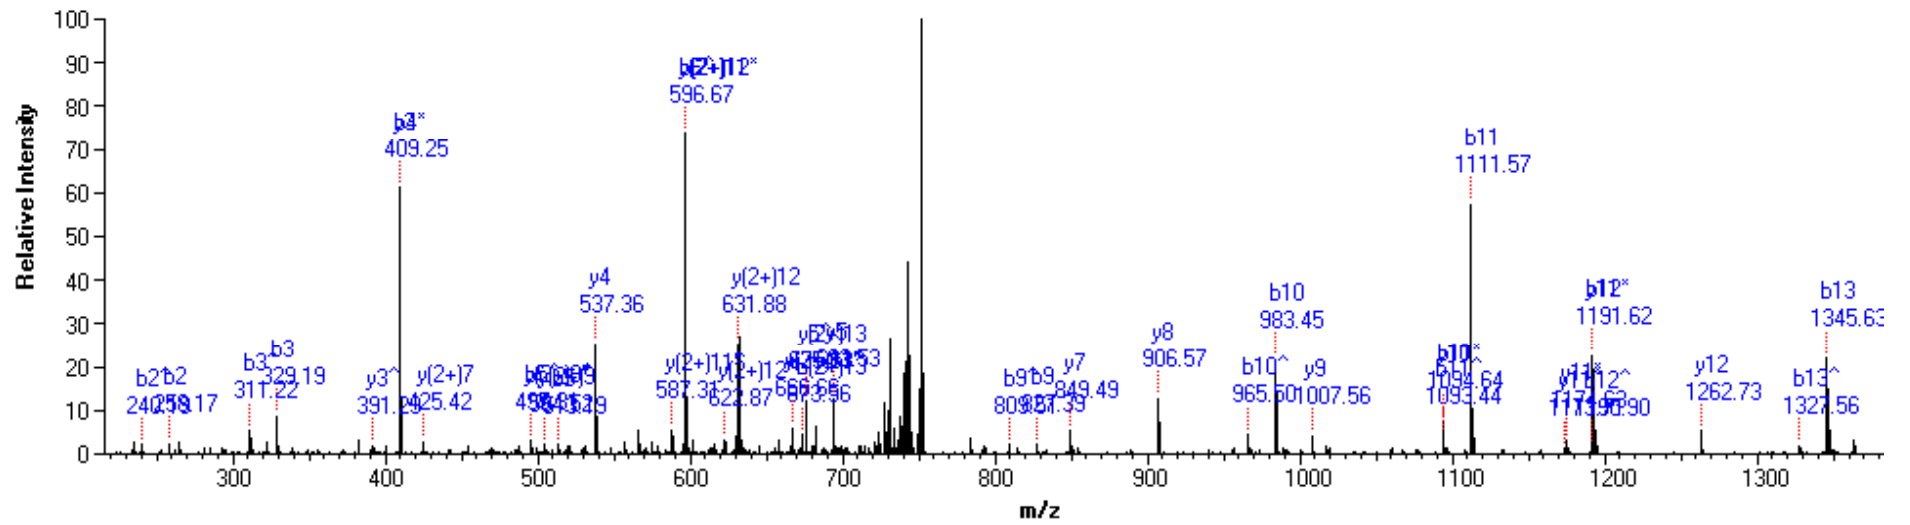

K(+42)SAPSTGGVK(+28)KPHR

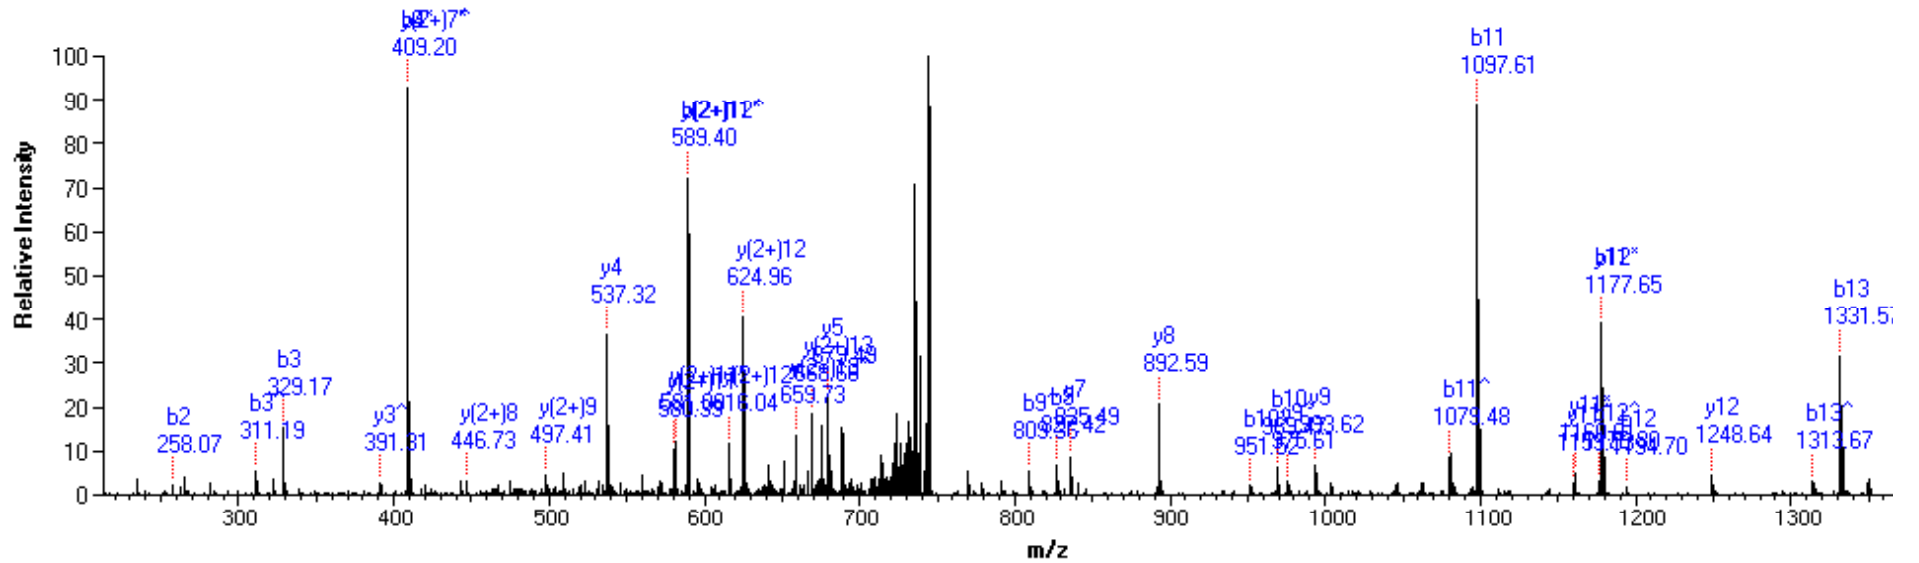

K(+42)SAPSTGGVKK(+14)PHR

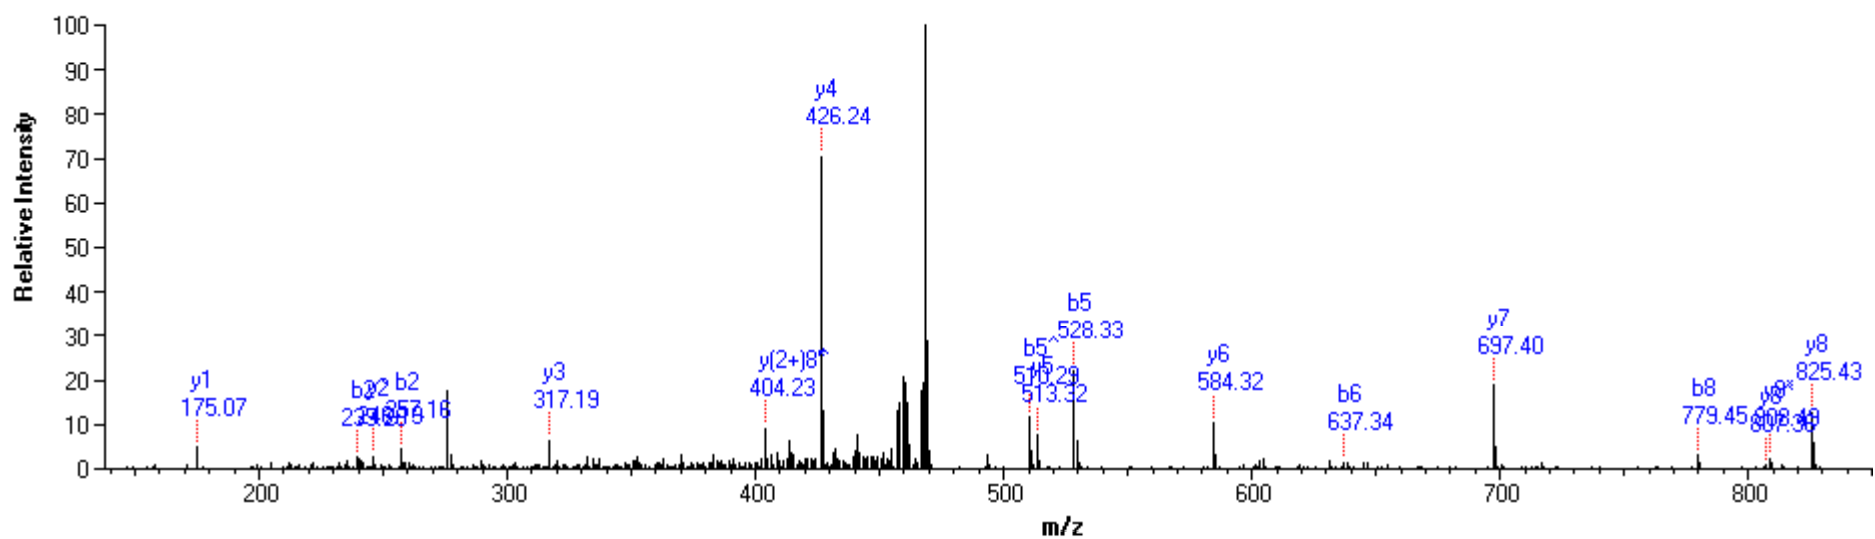

KQLASK(-19)AAR

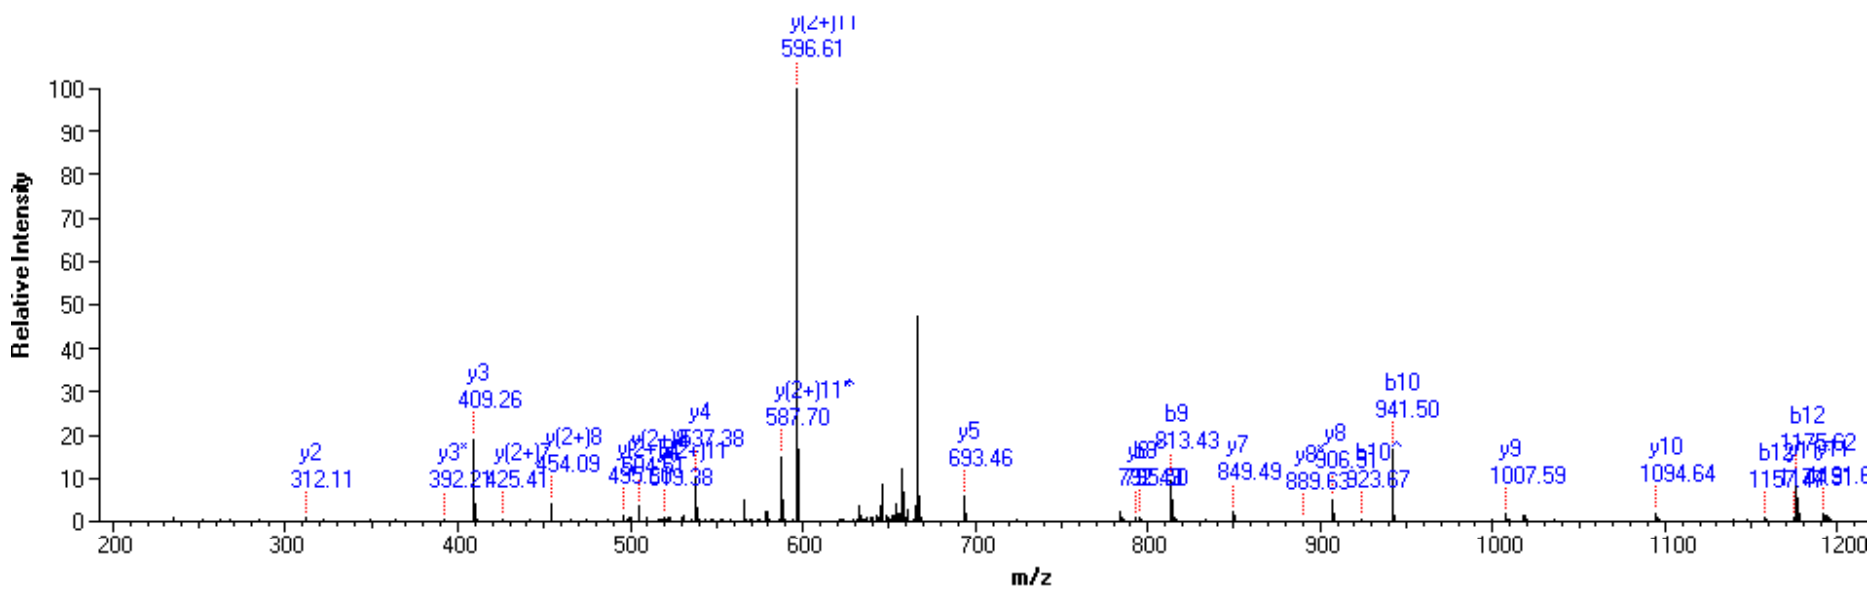

SAPSTGGVK(+28)KPHR



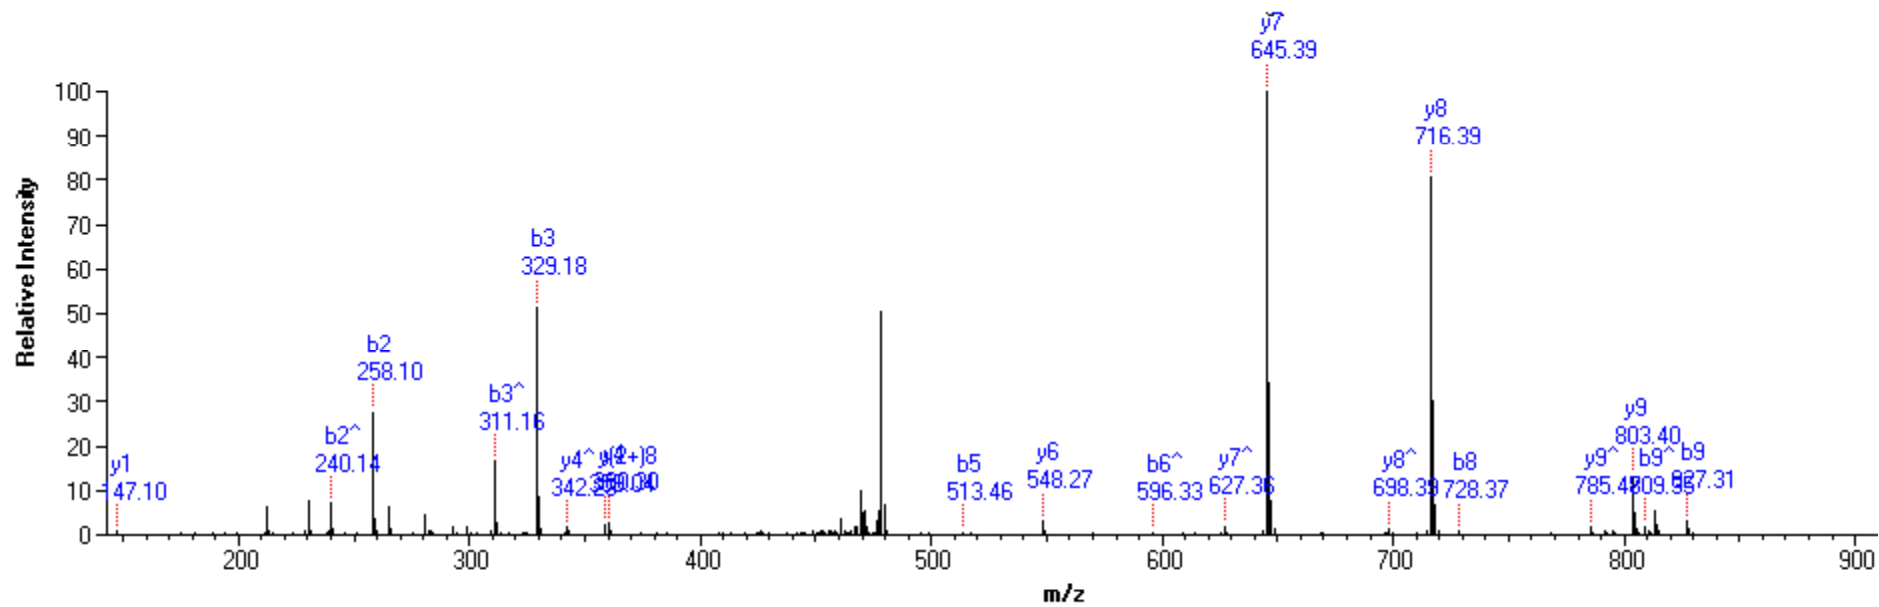

K(+42)SAPSTGGVK

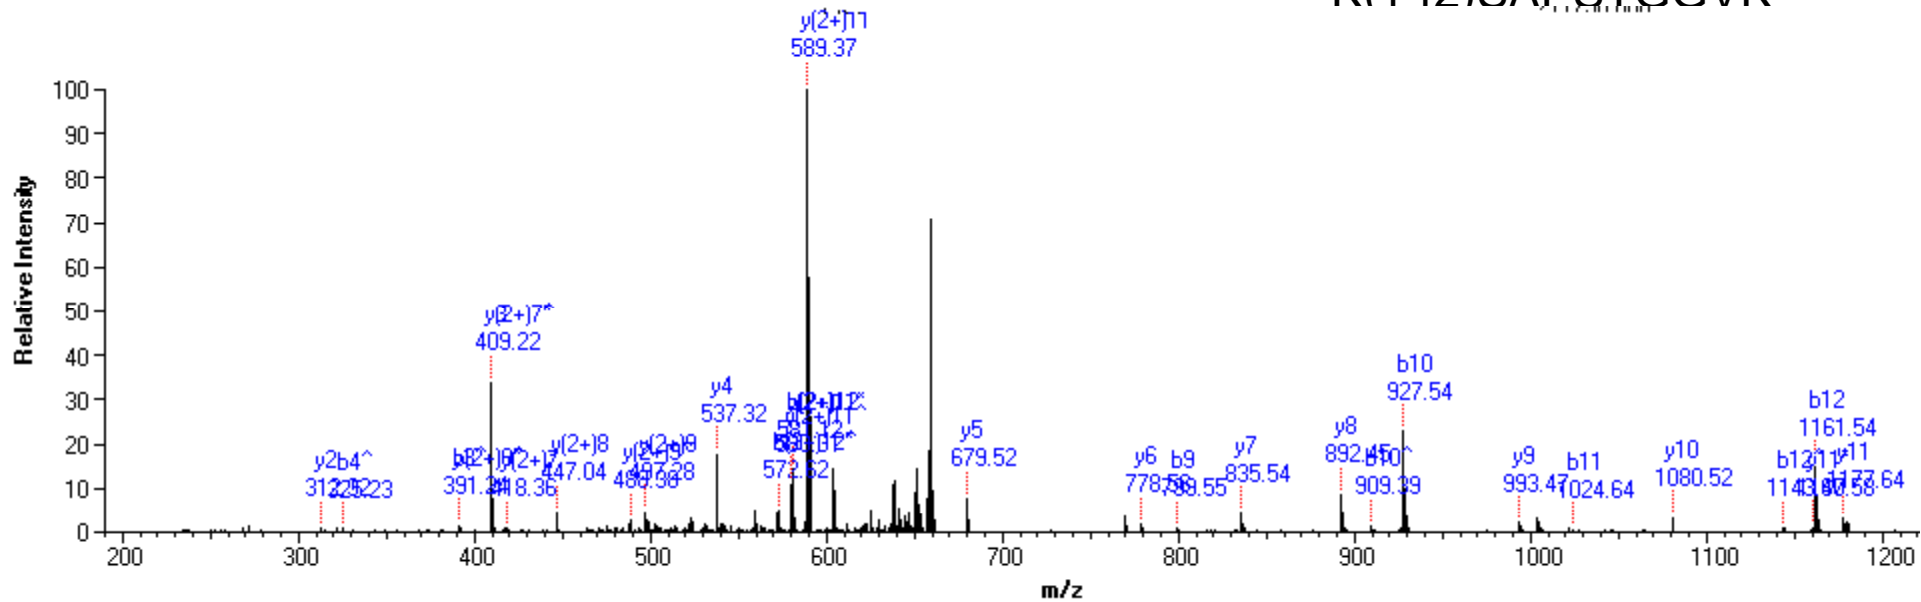

SAPSTGGVK(+14)KPHR

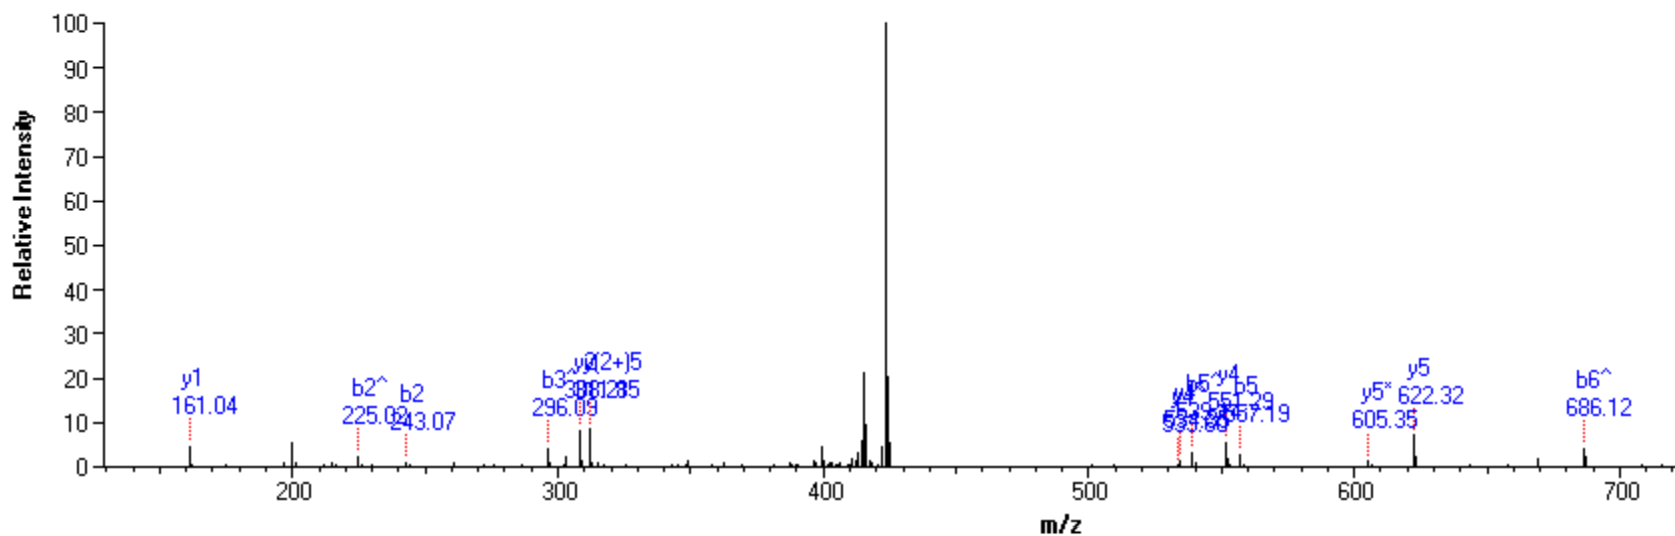

EIAQDFK(+14)

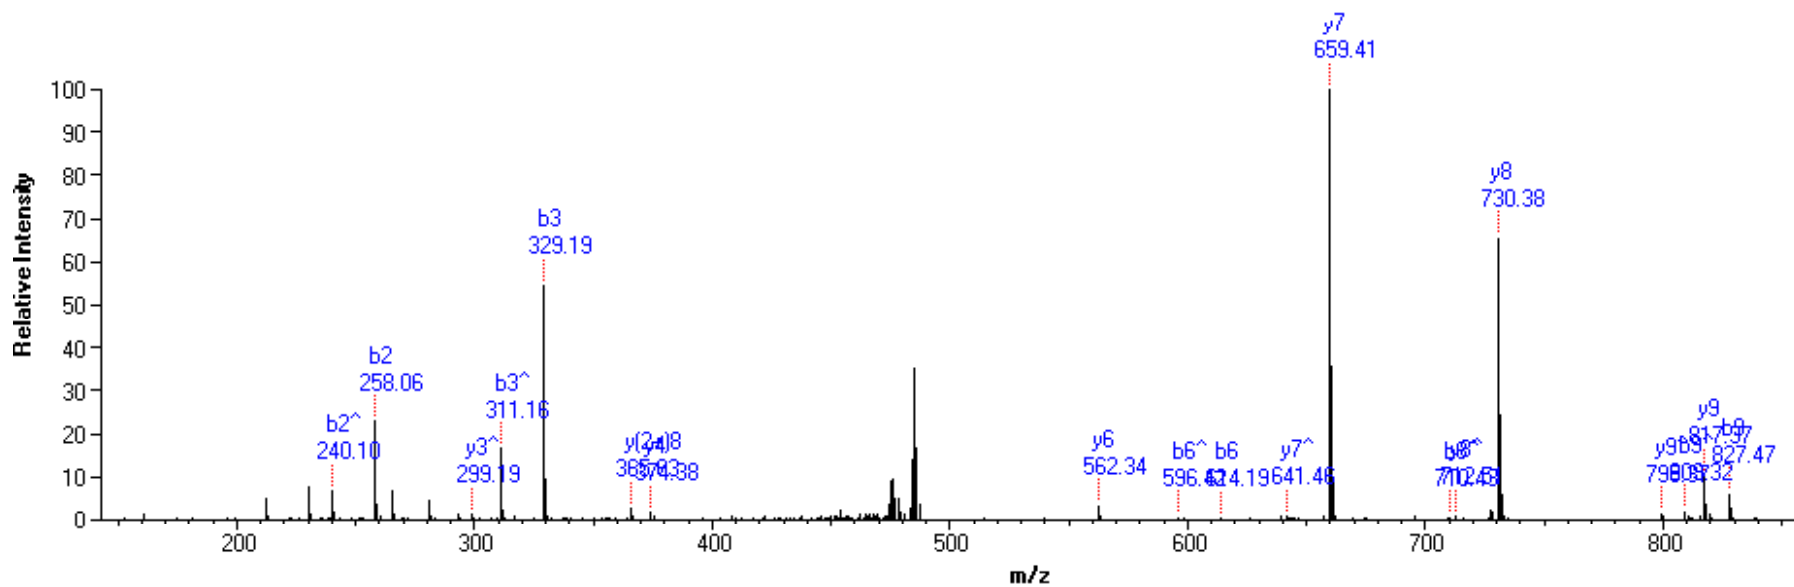

K(+42)SAPSTGGVK(+14)

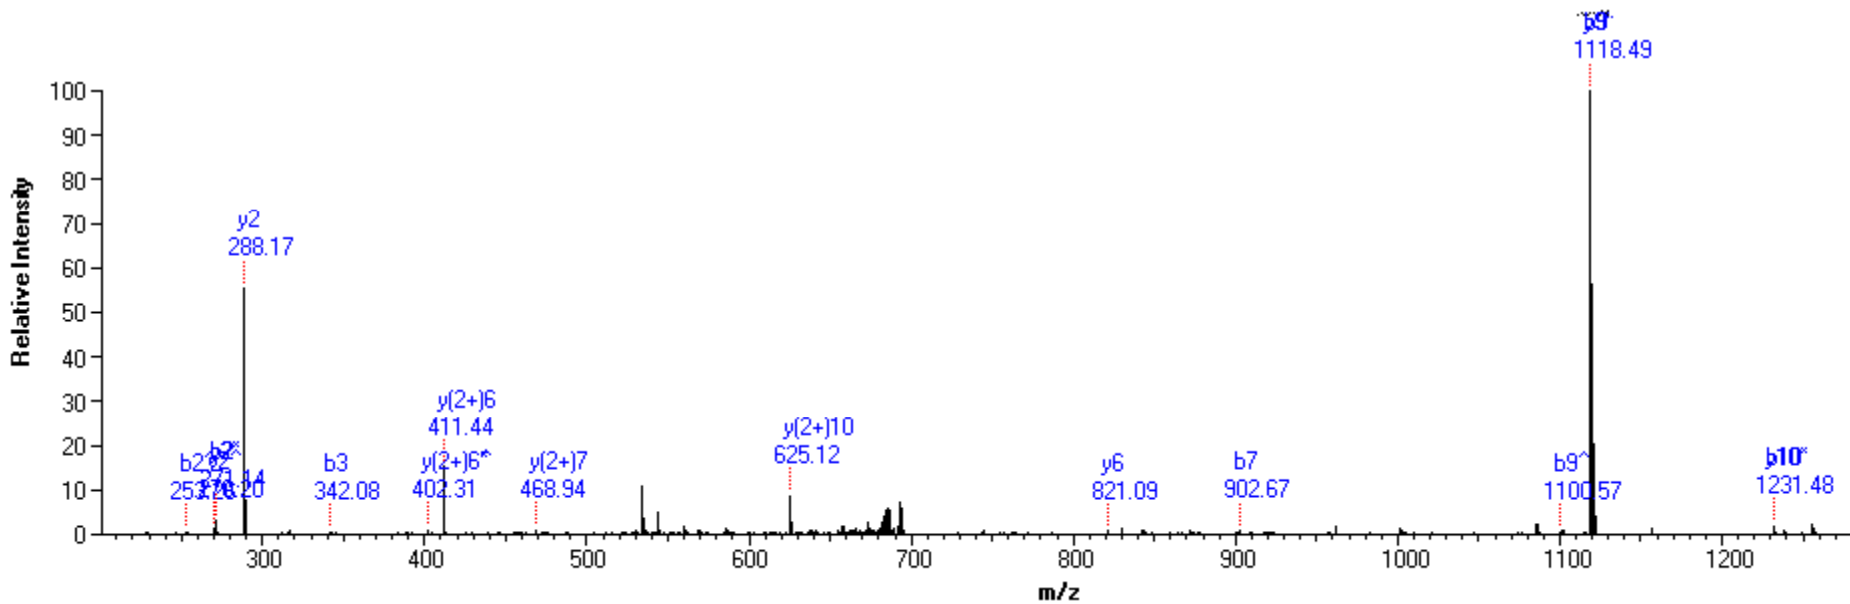

E(+28)IAQDFK(+42)TDLR

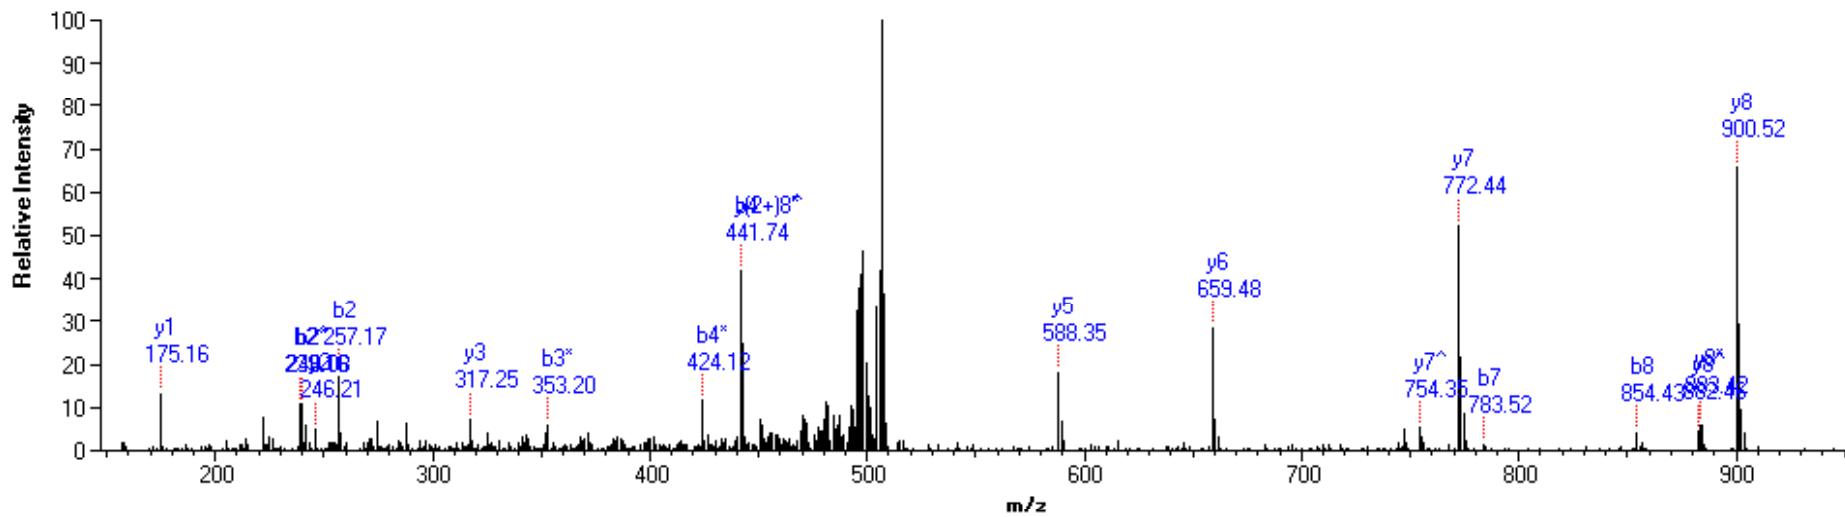

KQLASK(+56)AAR

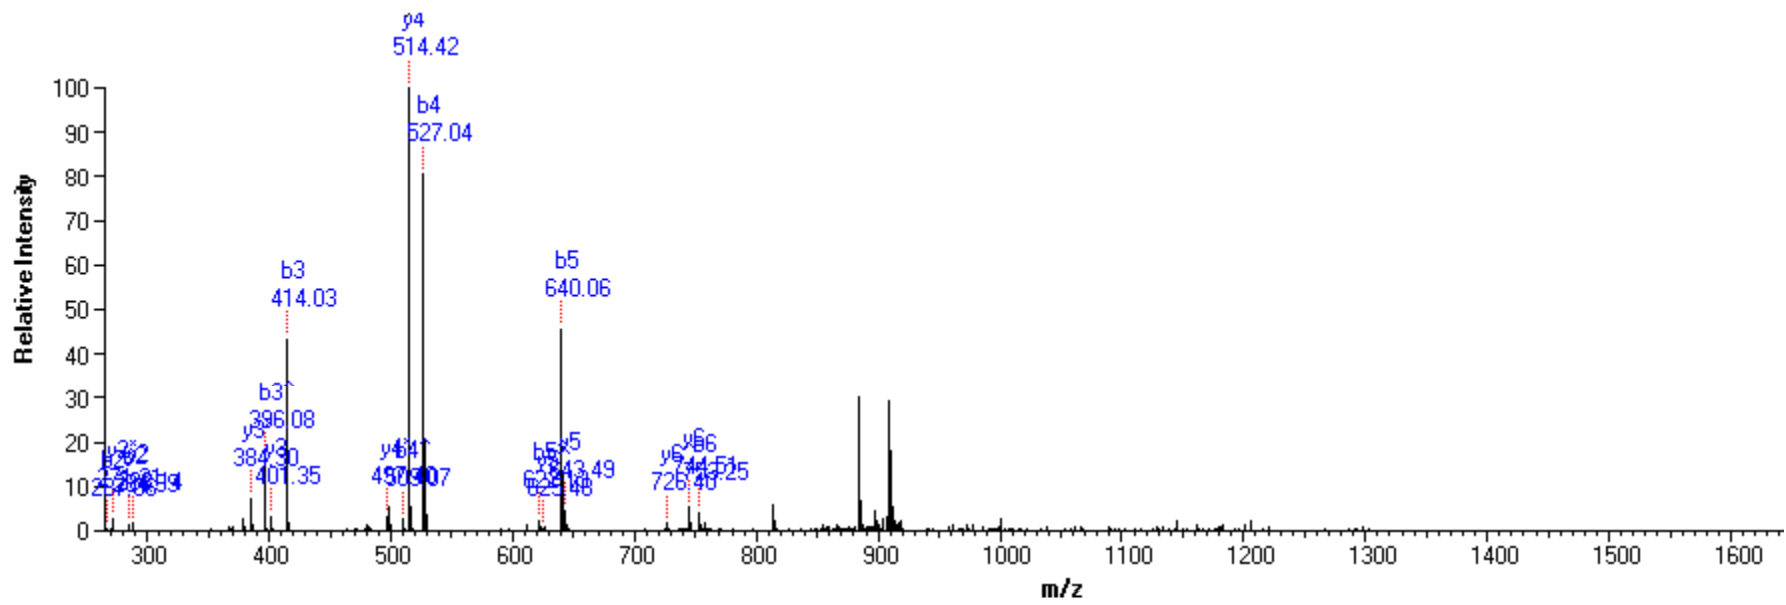

S(+96)TELLIR

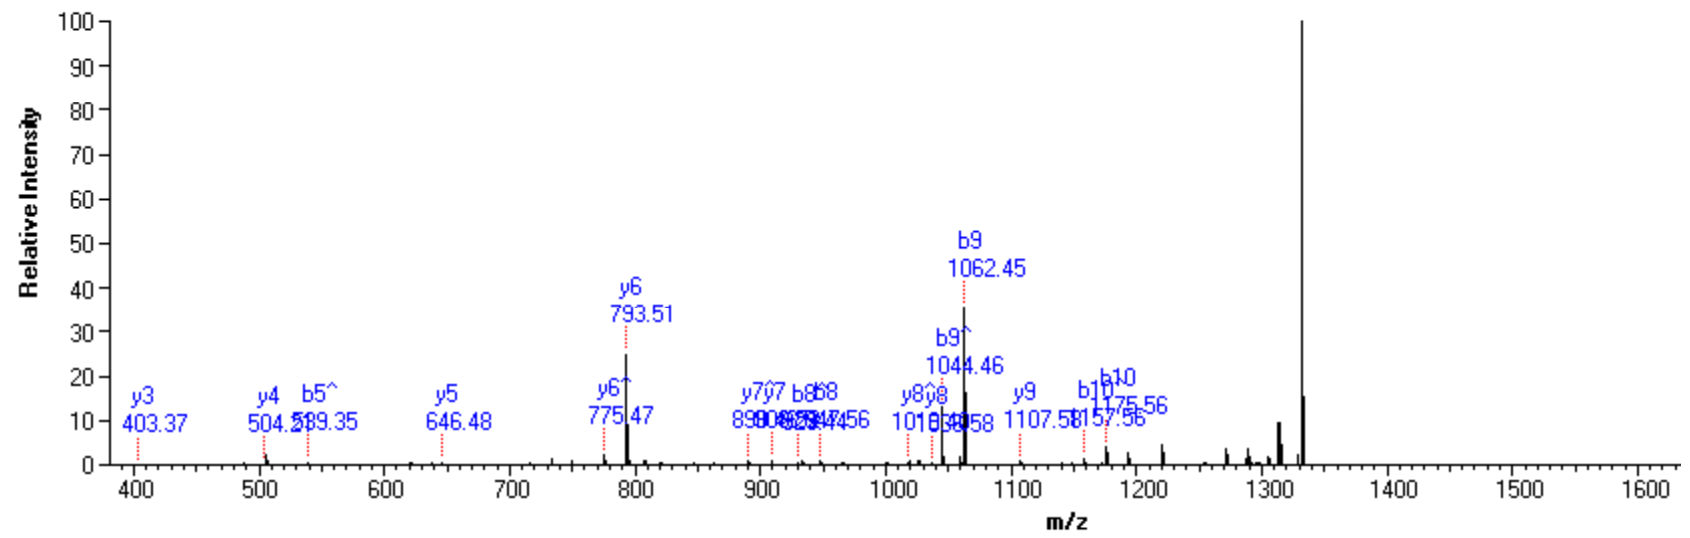

EIAQDFK(+14)TDLR

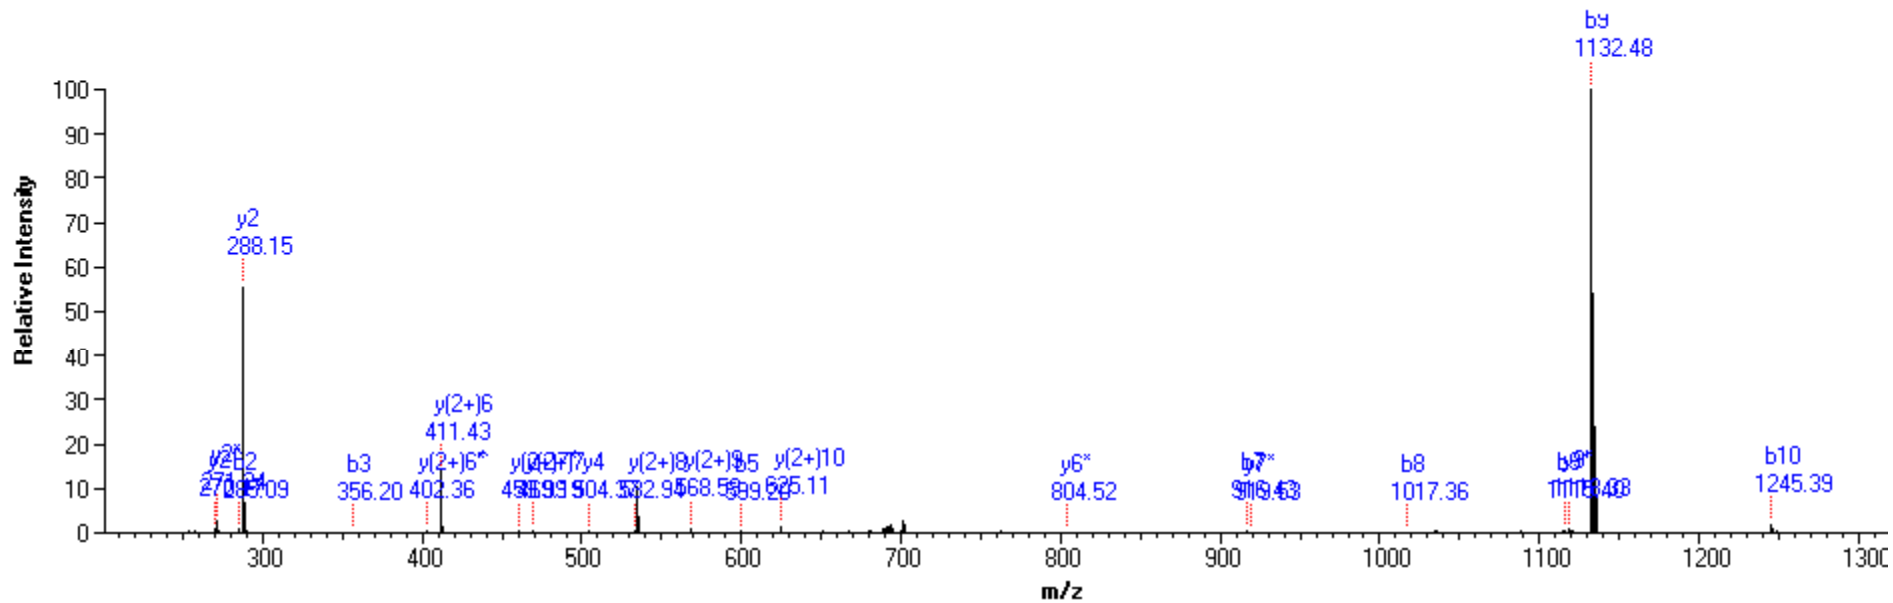

E(+42)IAQDFK(+42)TDLR

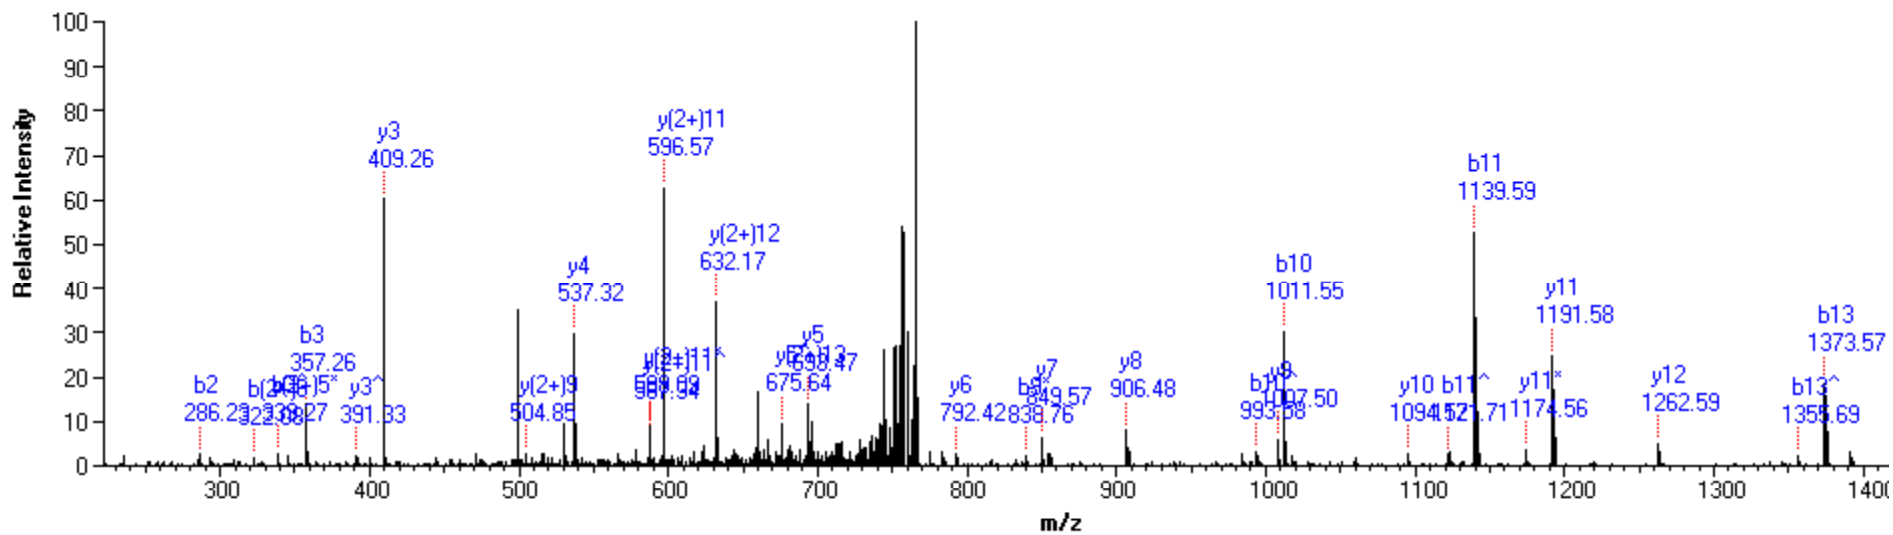

K(+70)SAPSTGGVK(+28)KPHR

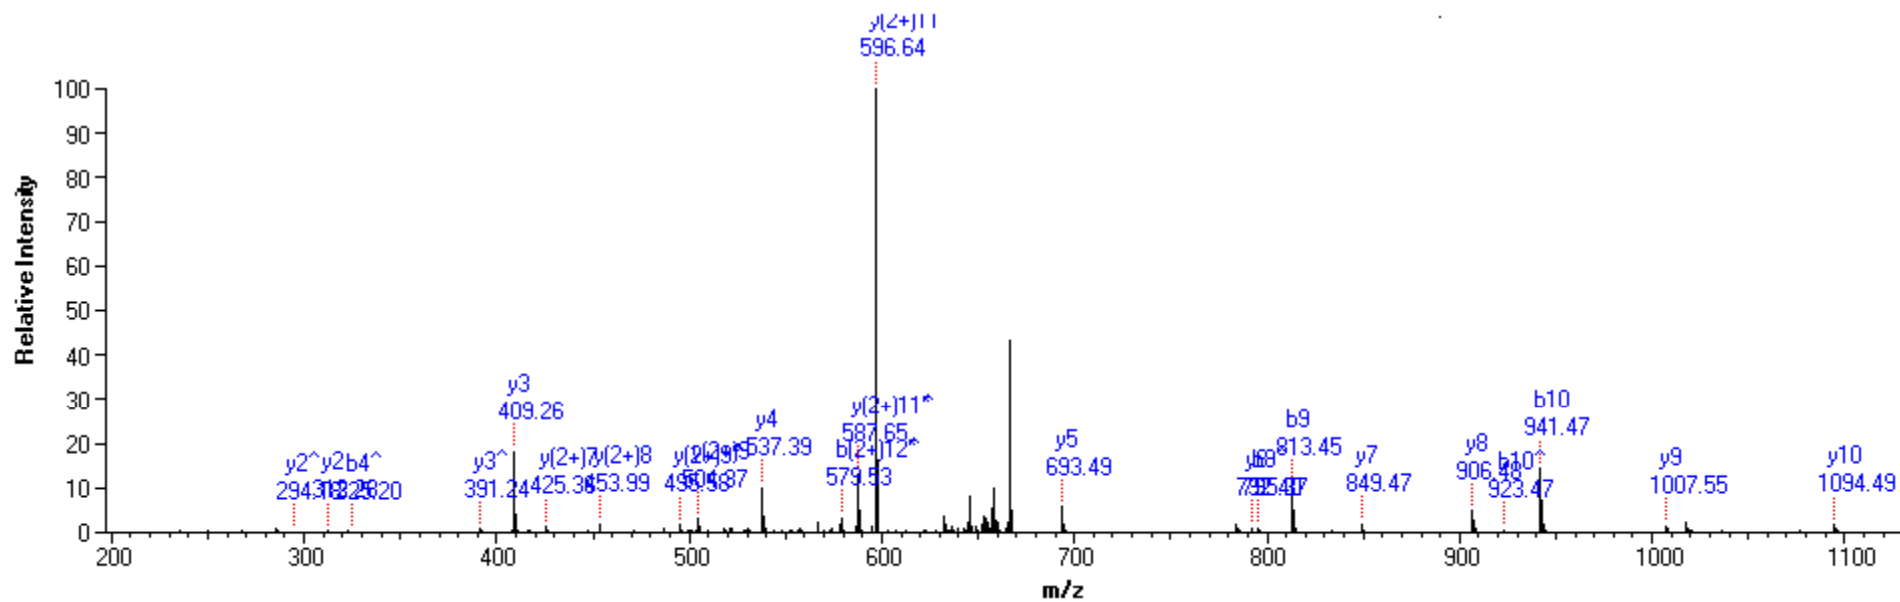

SAPSTGGVK(+28)KPHR

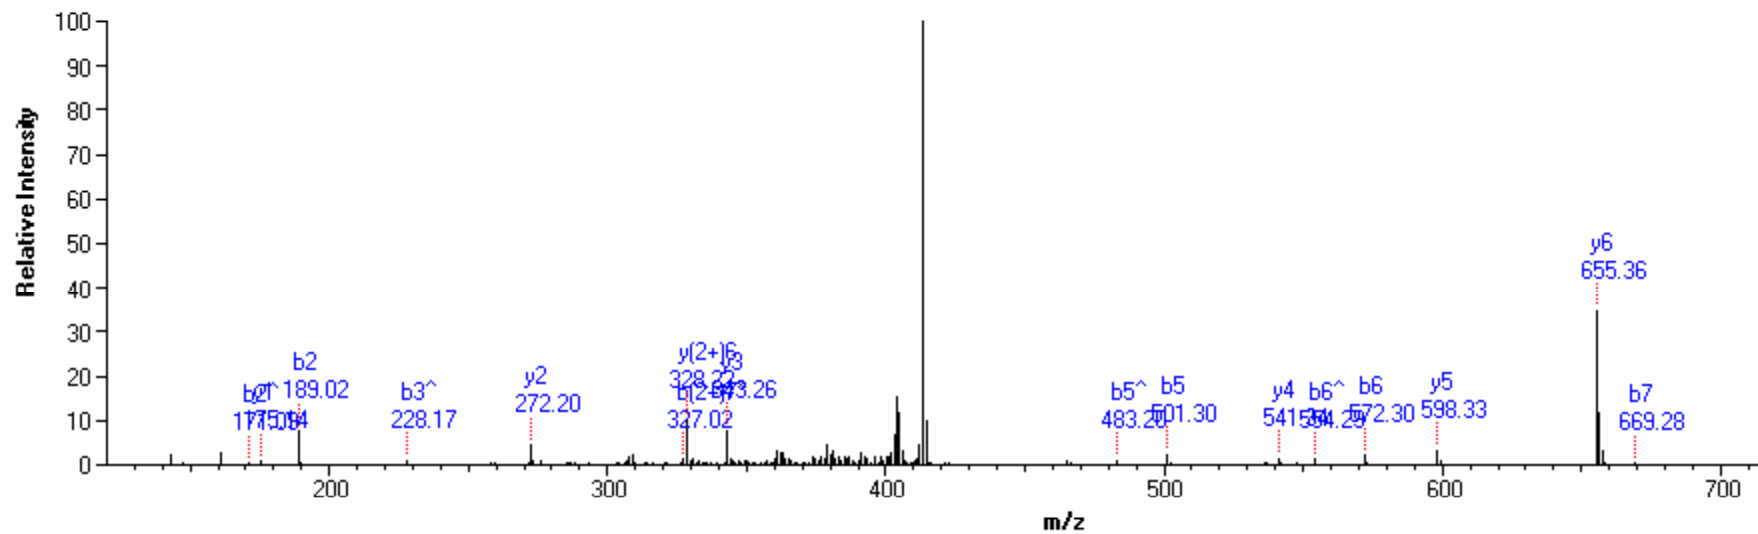

STGGK(+70)APR

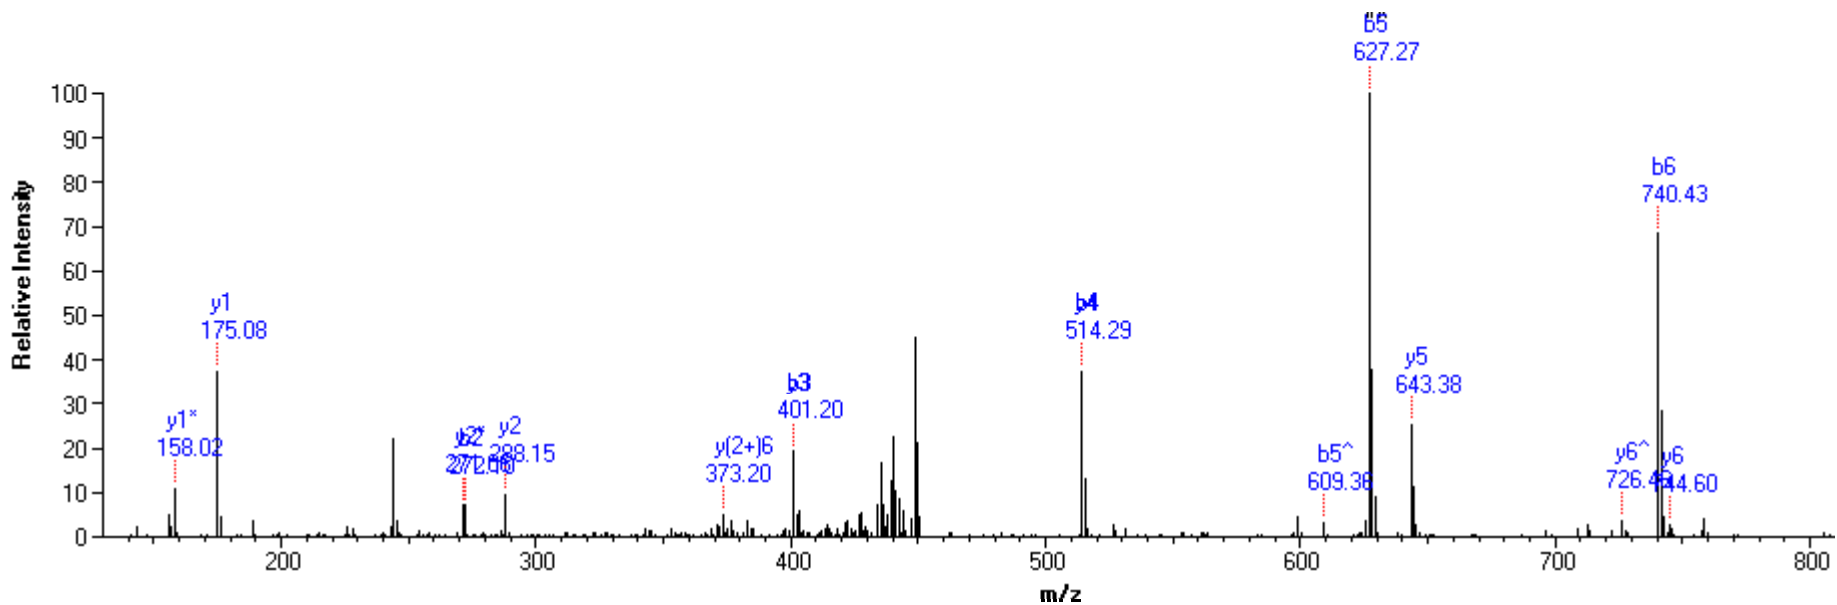

K.S(+83)TELLIR.K

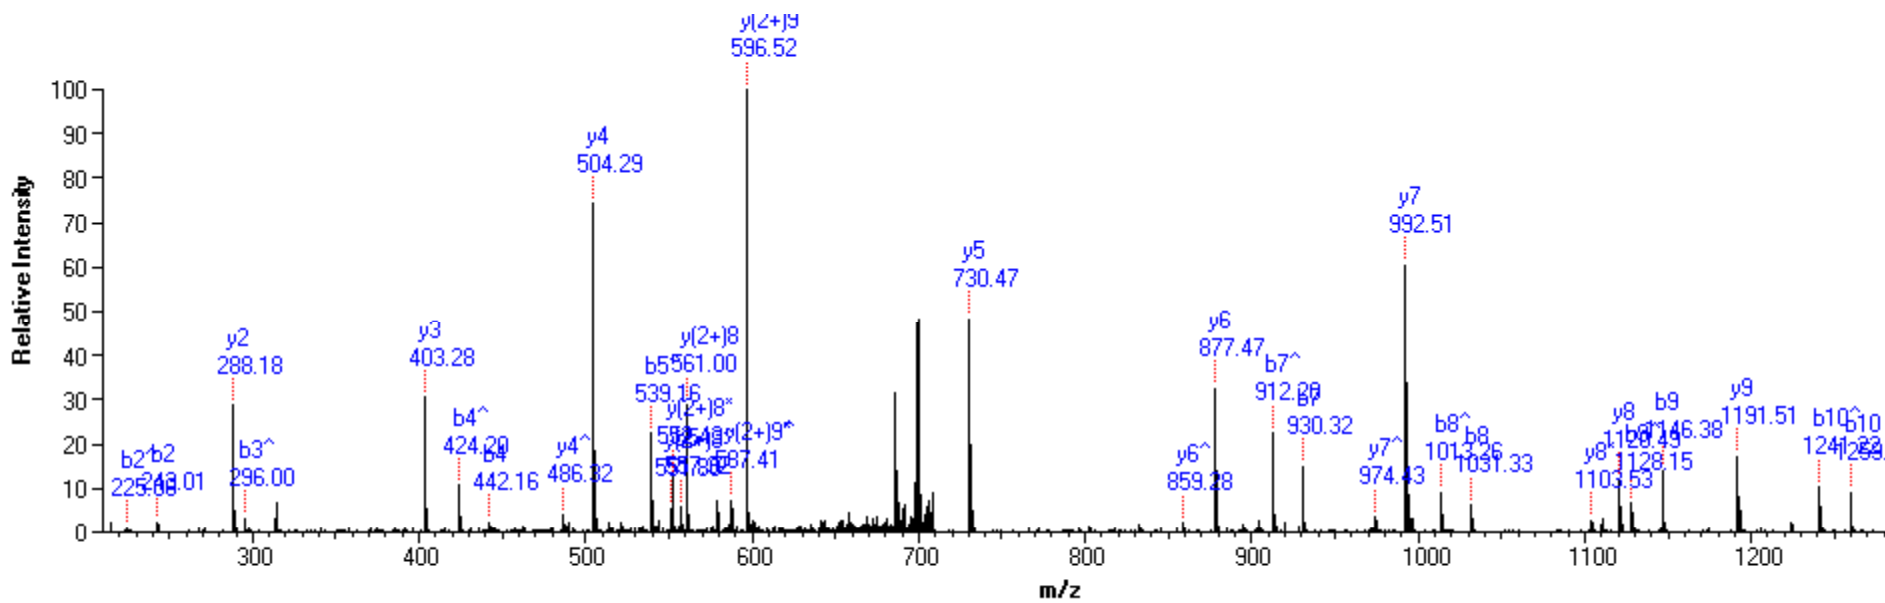

EIAQDFK(+98)TDLR

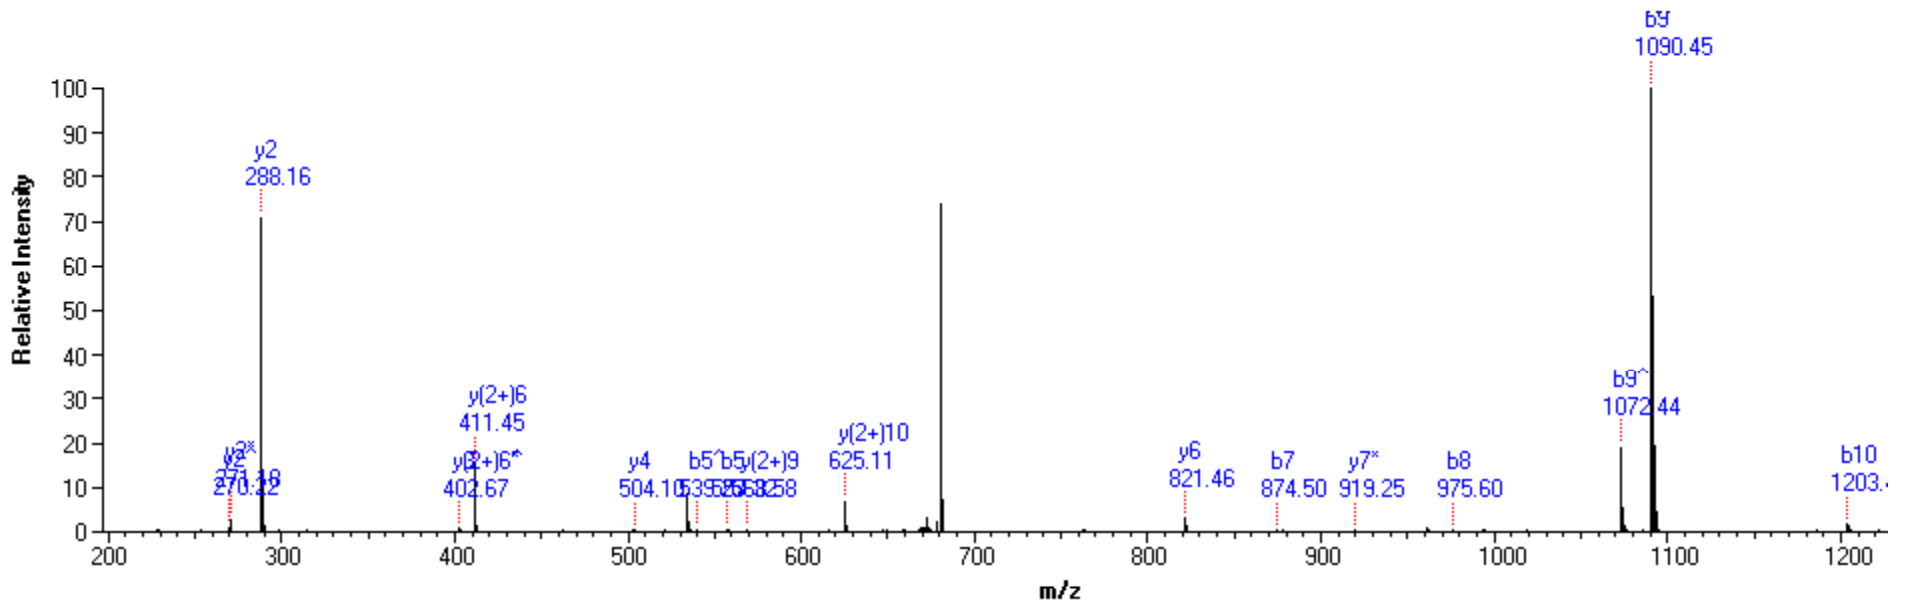

EIAQDFK(+42)TDLR

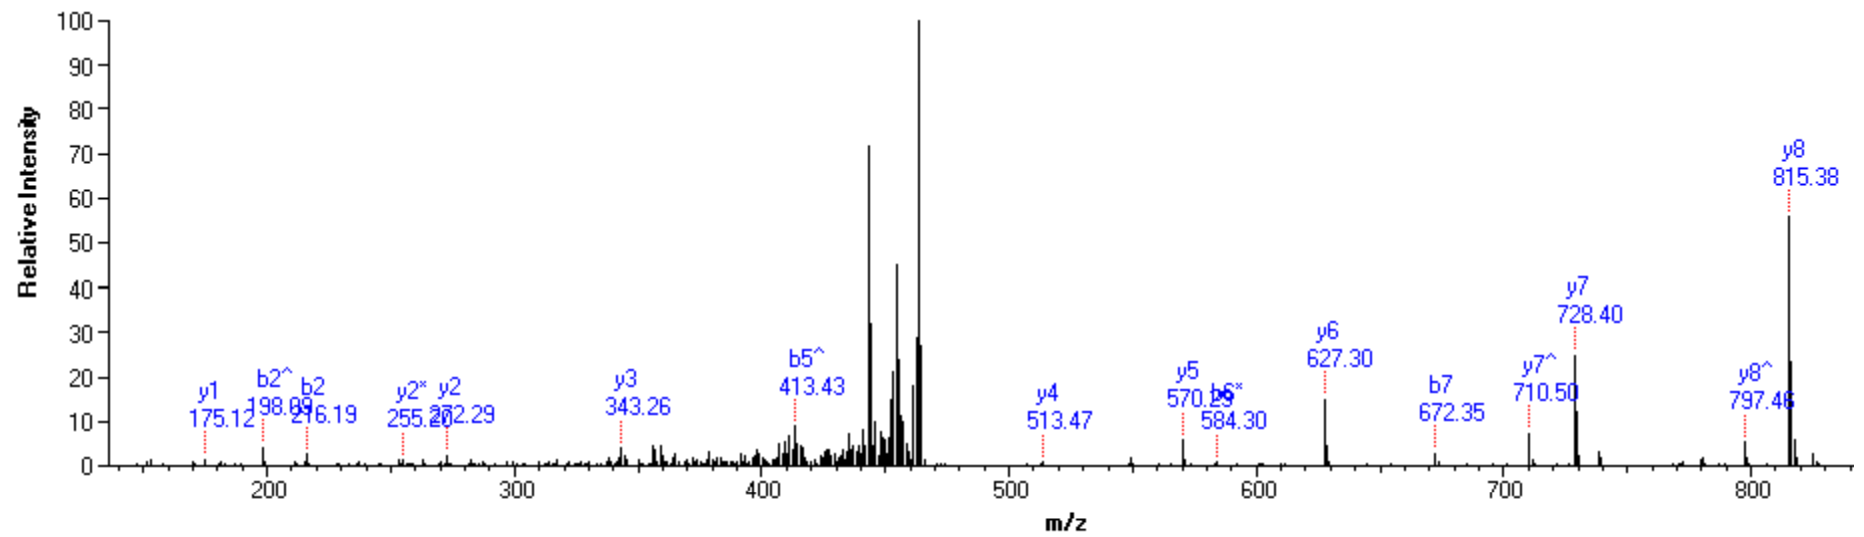

KSTGGK(+42)APR



**Supplemental Information S4. MS/MS spectra of the modified peptides from yeast histone H4.**

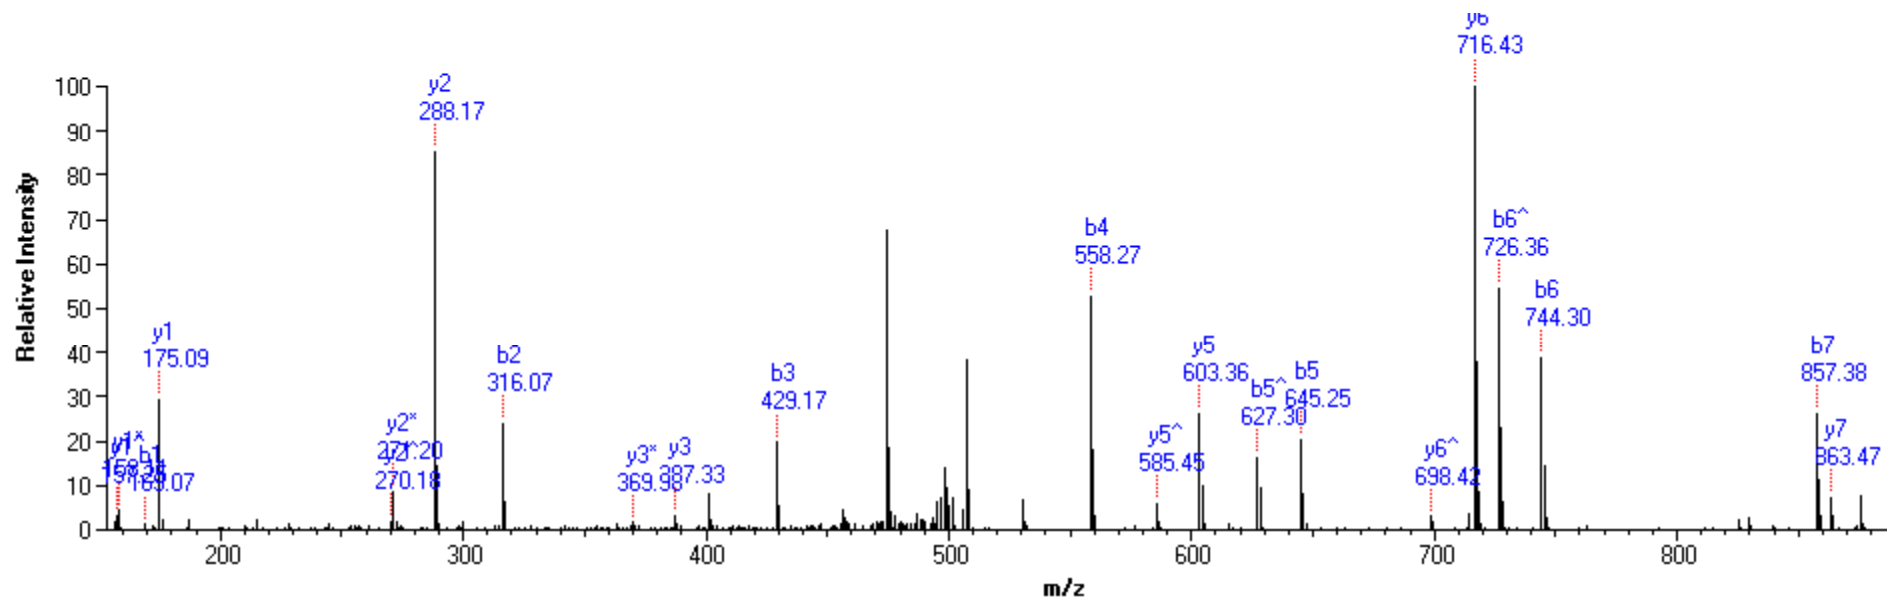

S(+81)FLESVIR

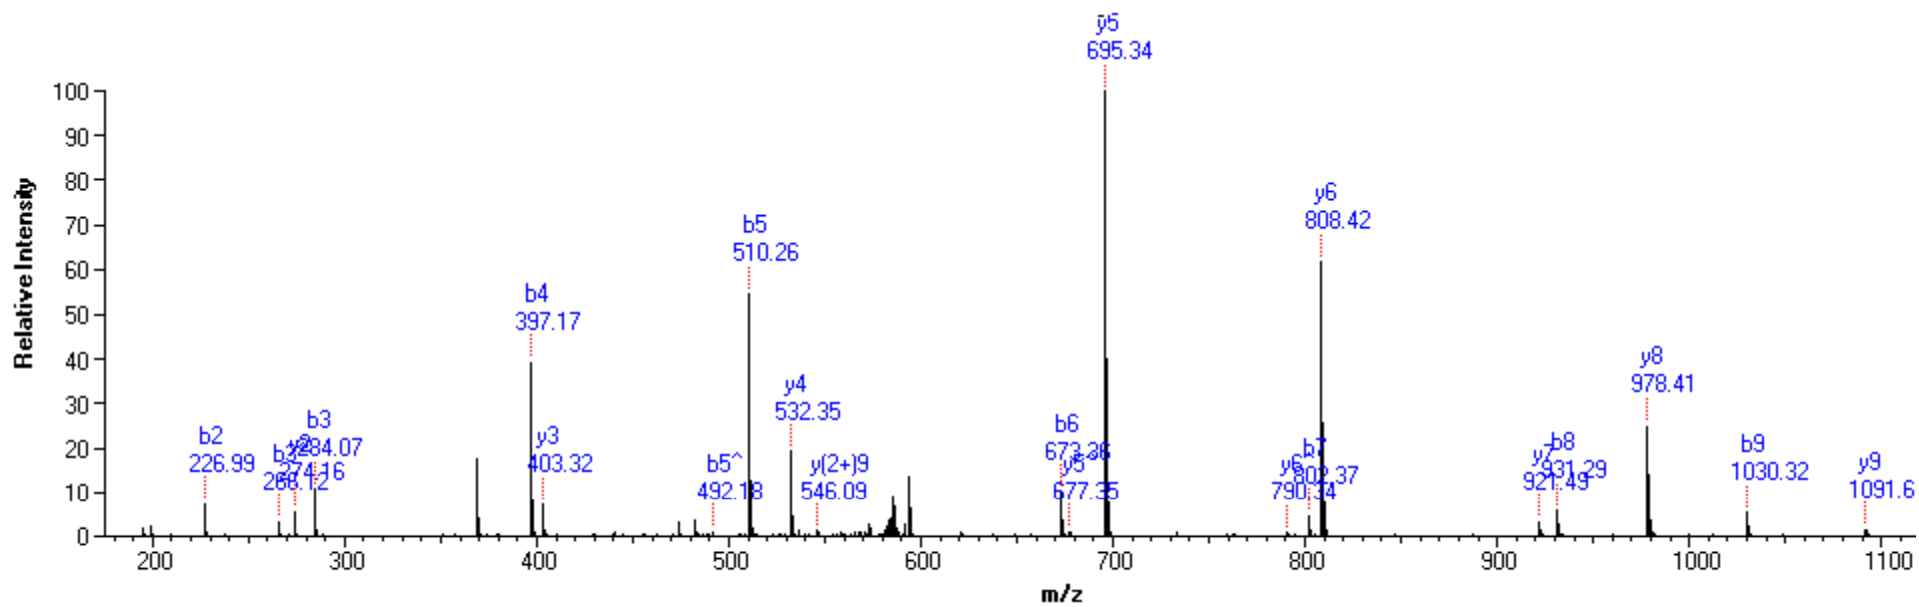

IS(+26)GLIYEEVR

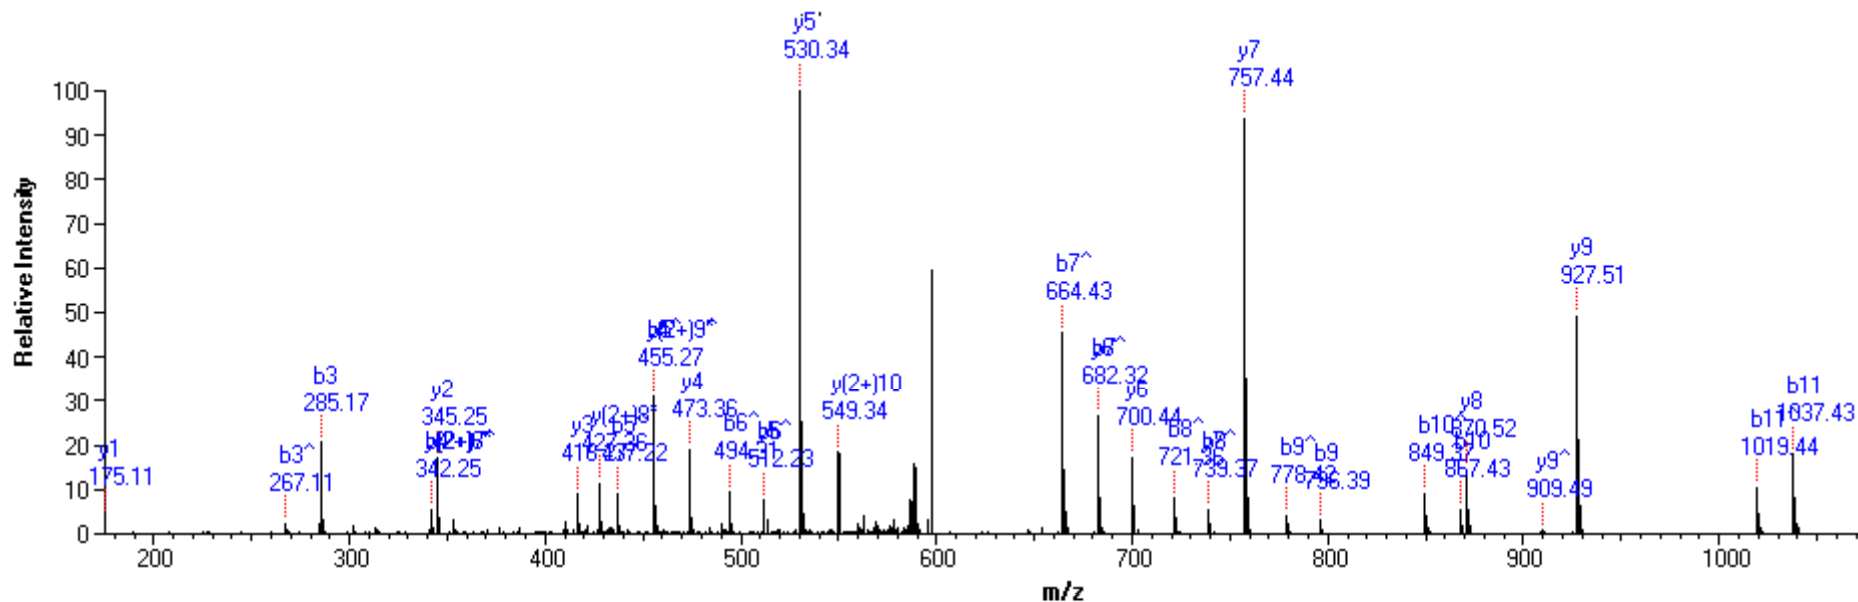

GGK(+42)GLGK(+42)GGAK(+42)R

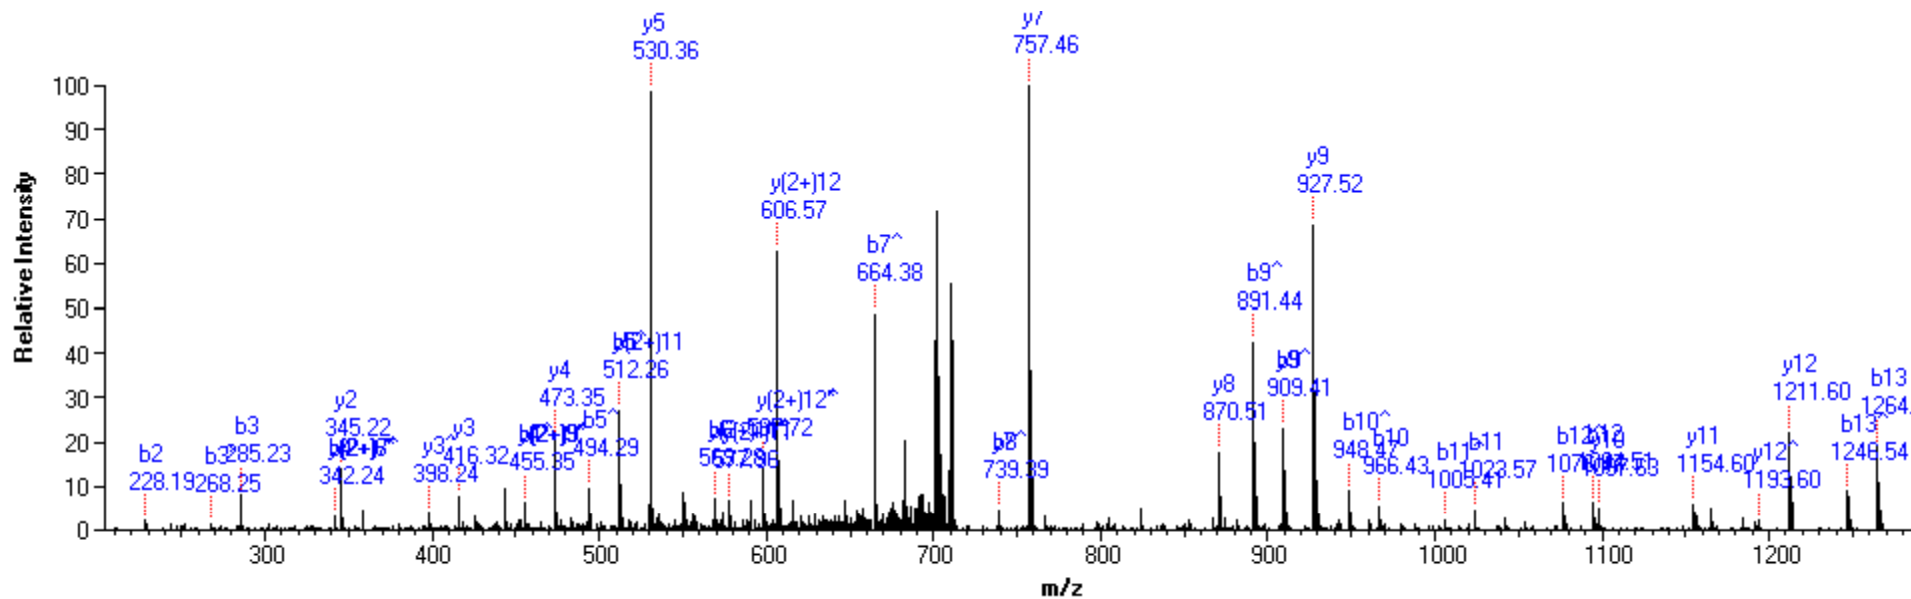

GK(+42)GGK(+42)GLGK(+42)GGAK(+42)R

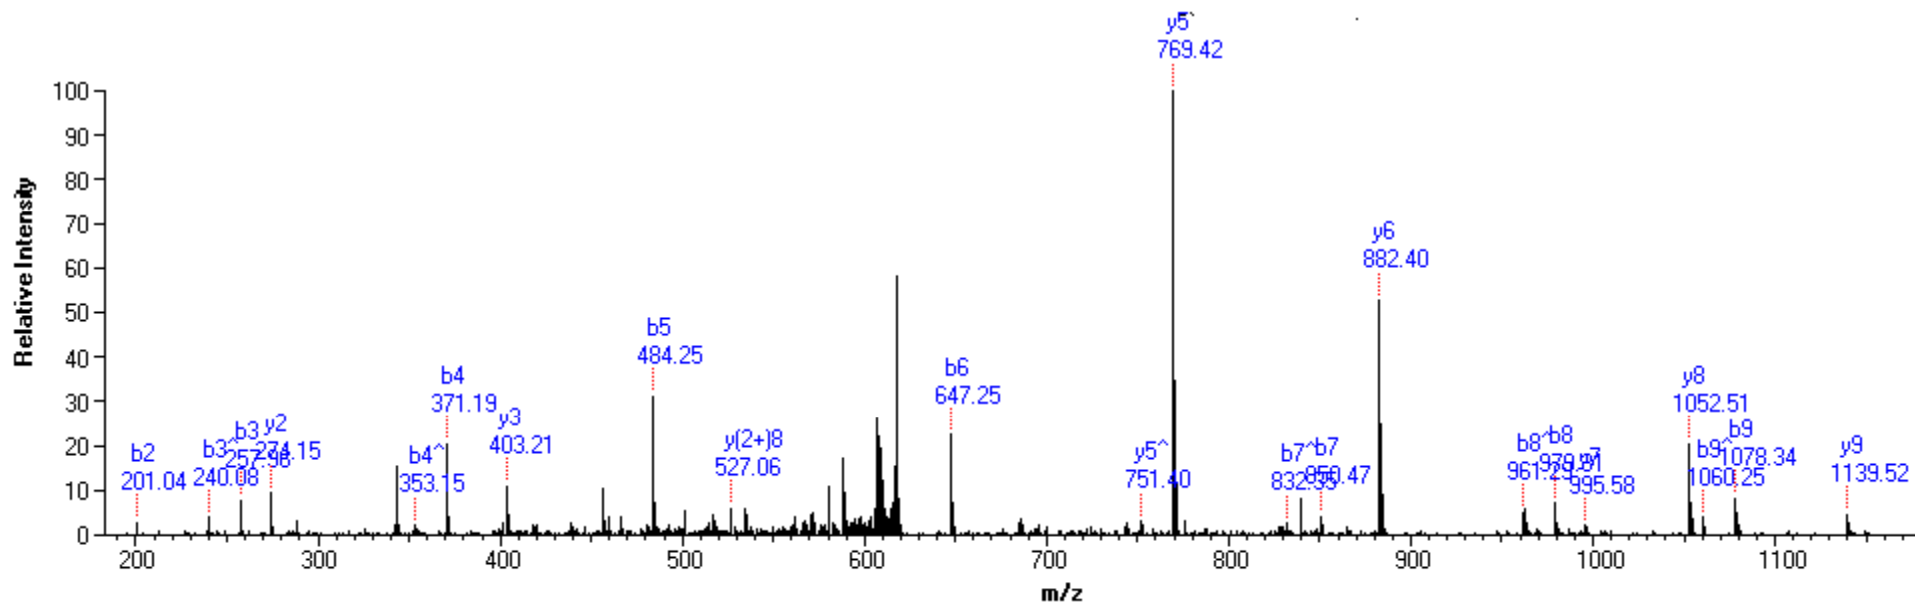

ISGLIYE(+74)EVR

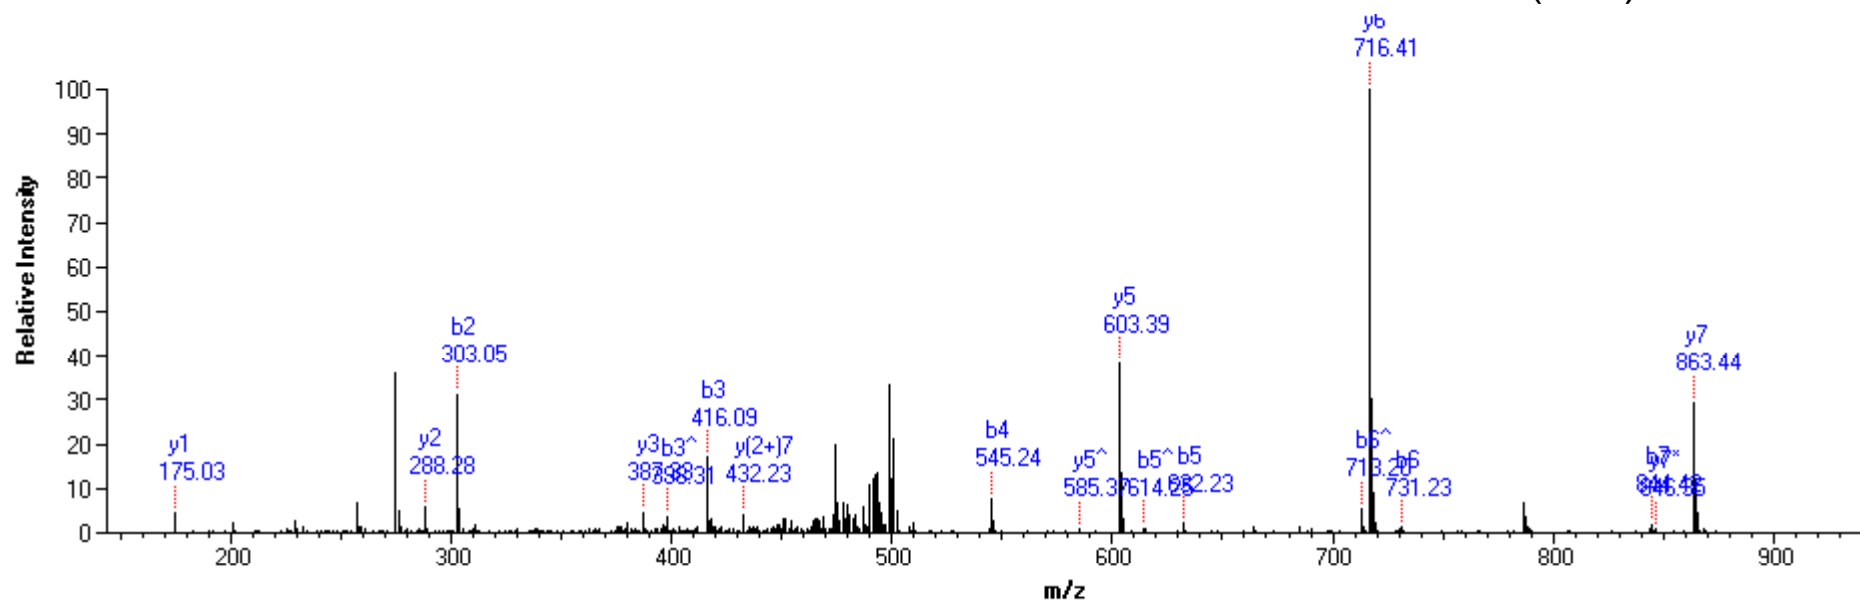

S(+68)FLESVIR

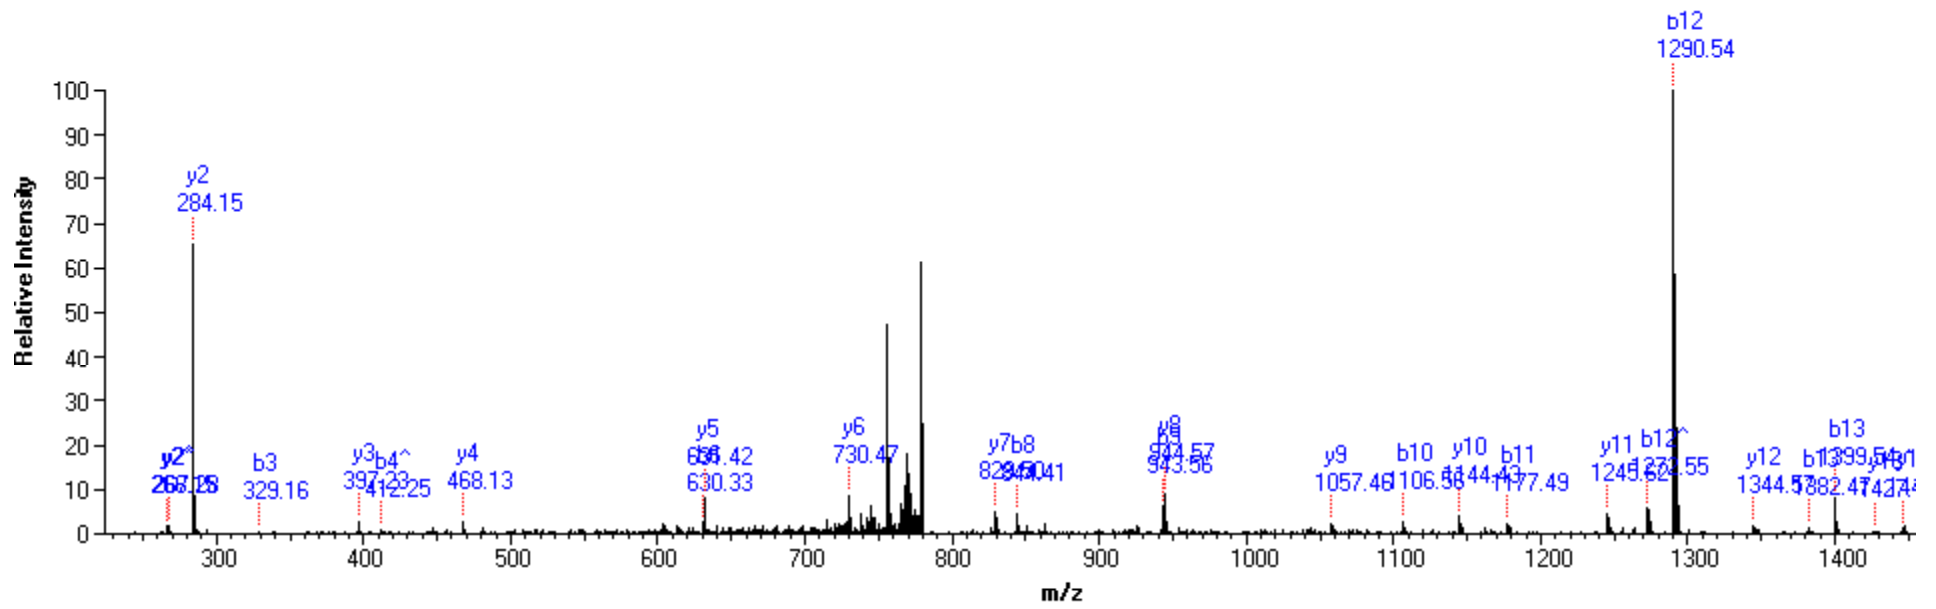

KTVTSLDVVYALK(-19)R

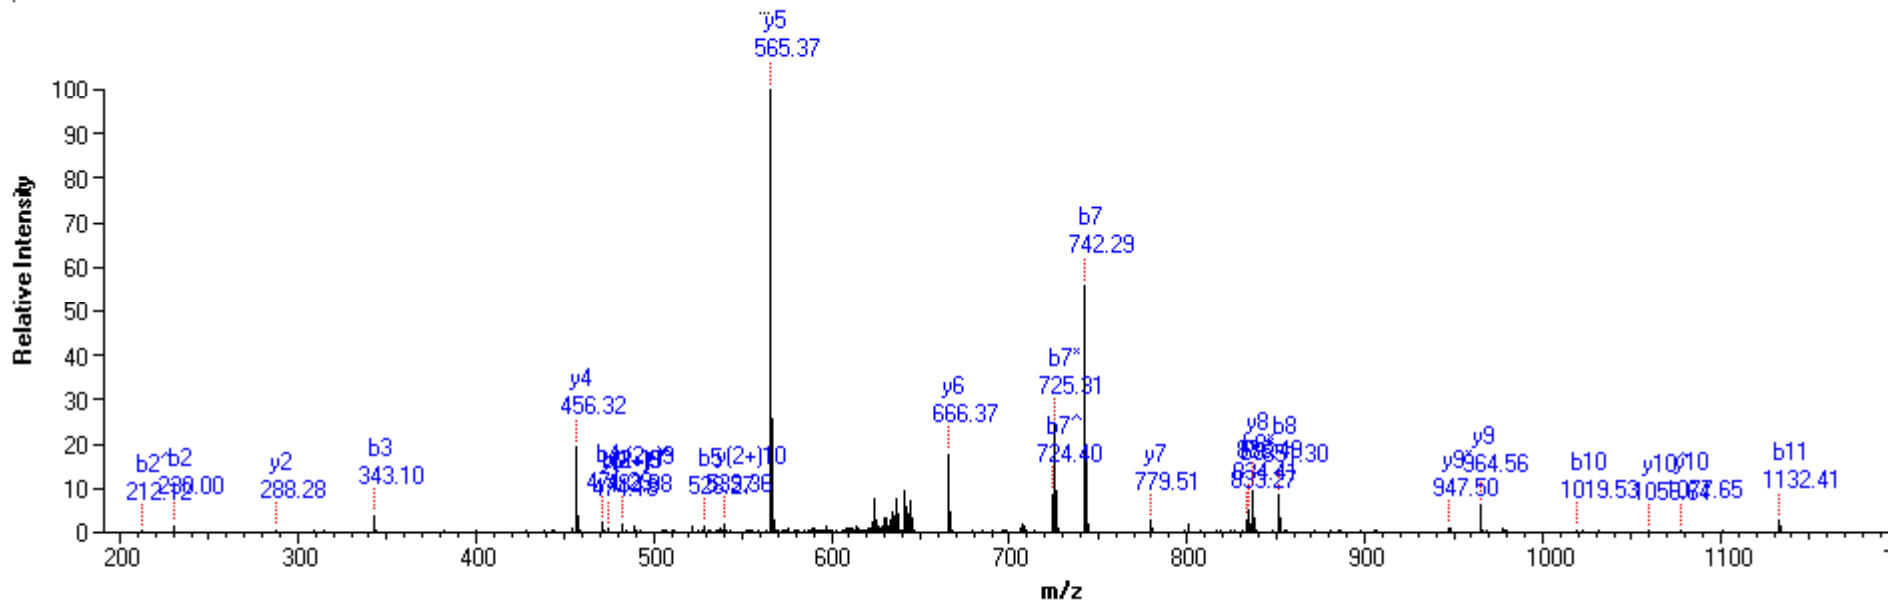

DNIQGITK(-19)PAIR

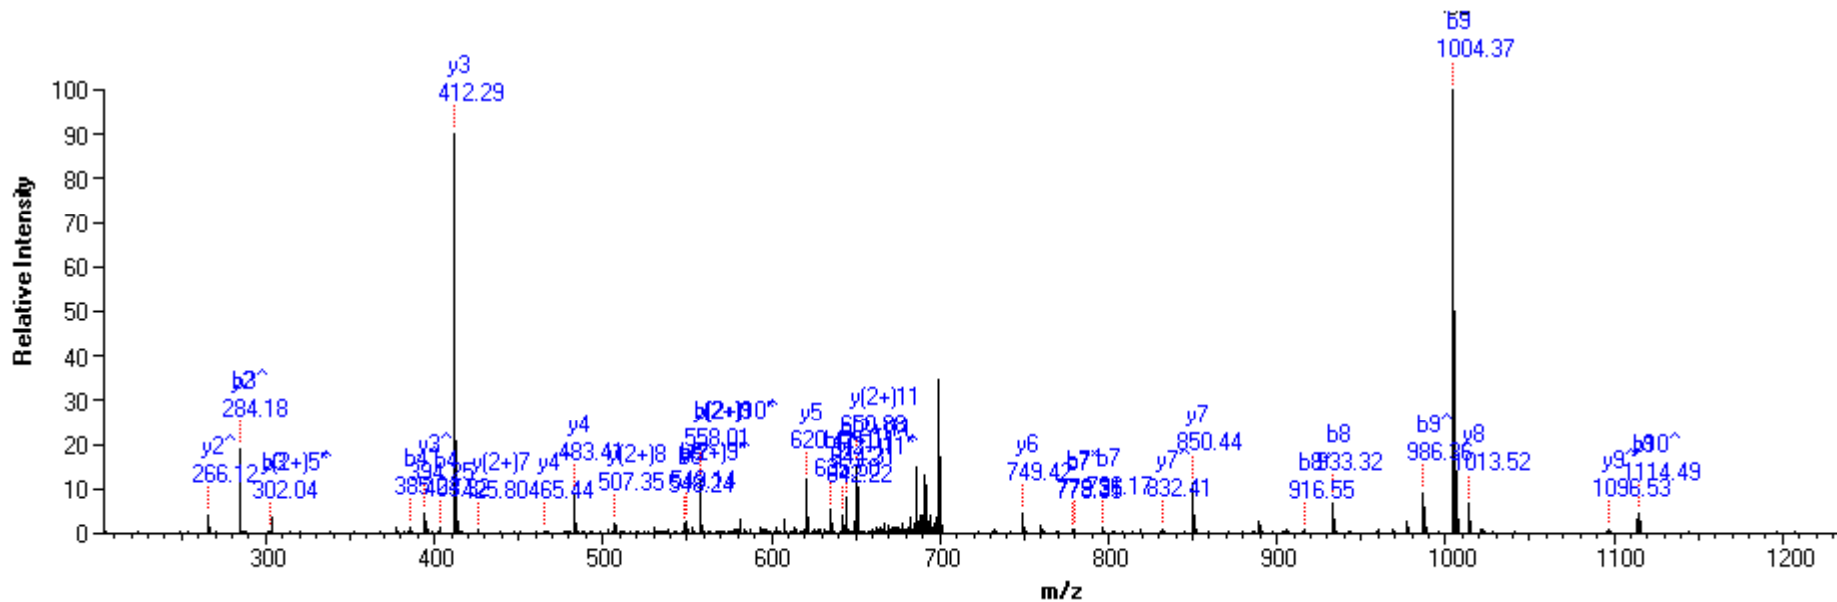

DSVTYTEHAKRK(-19)

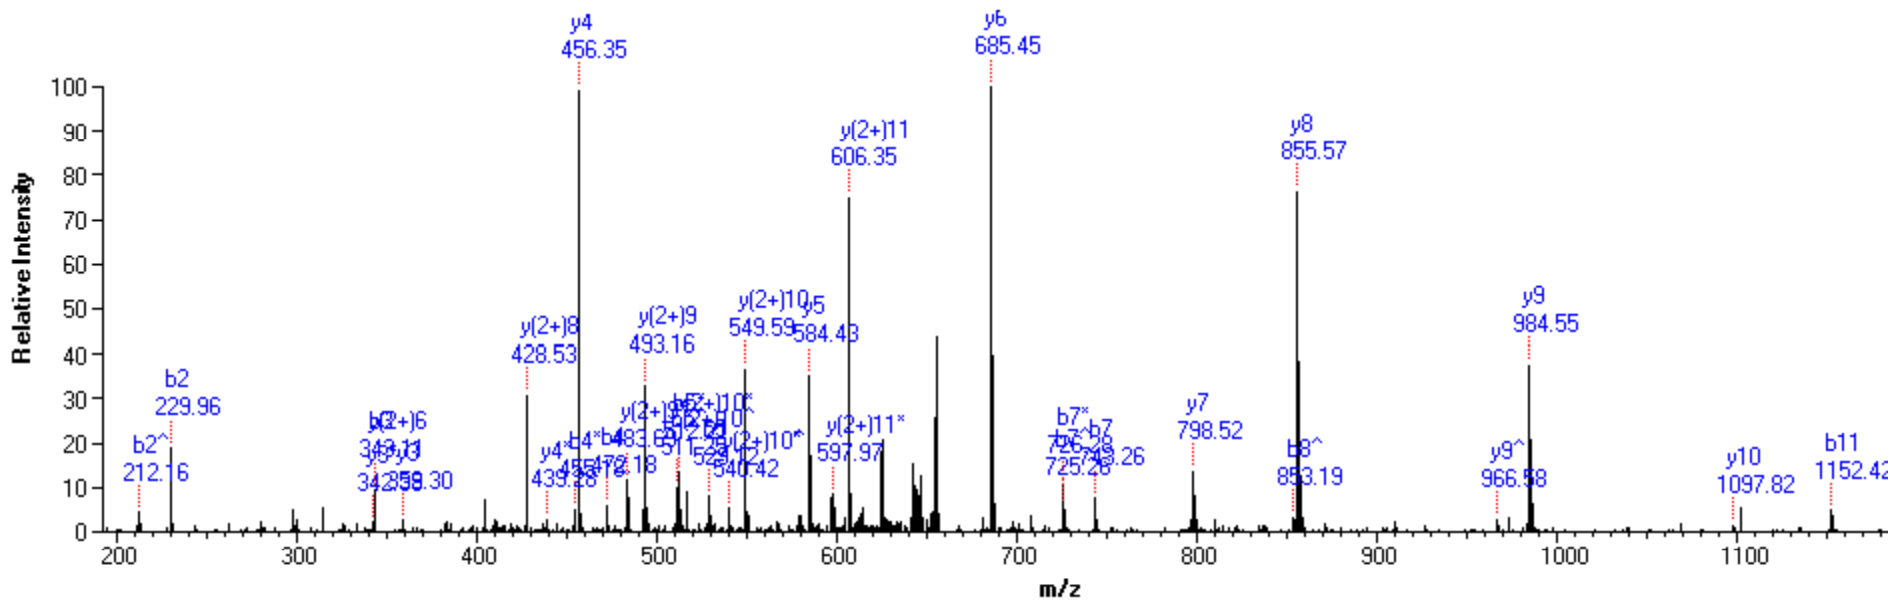

DNIQ(+1)GITKPAIR

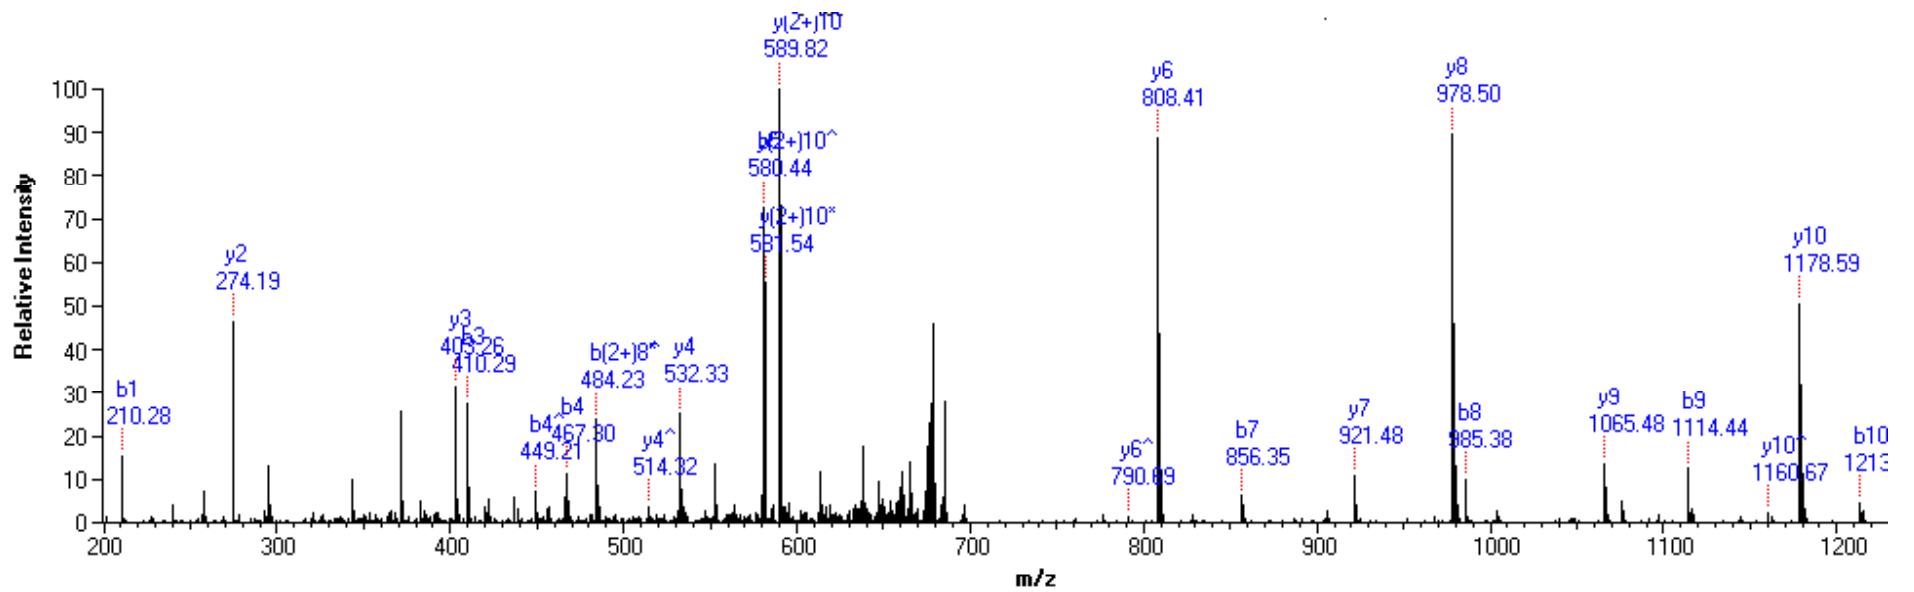

R(+53)ISGLIYEEVR

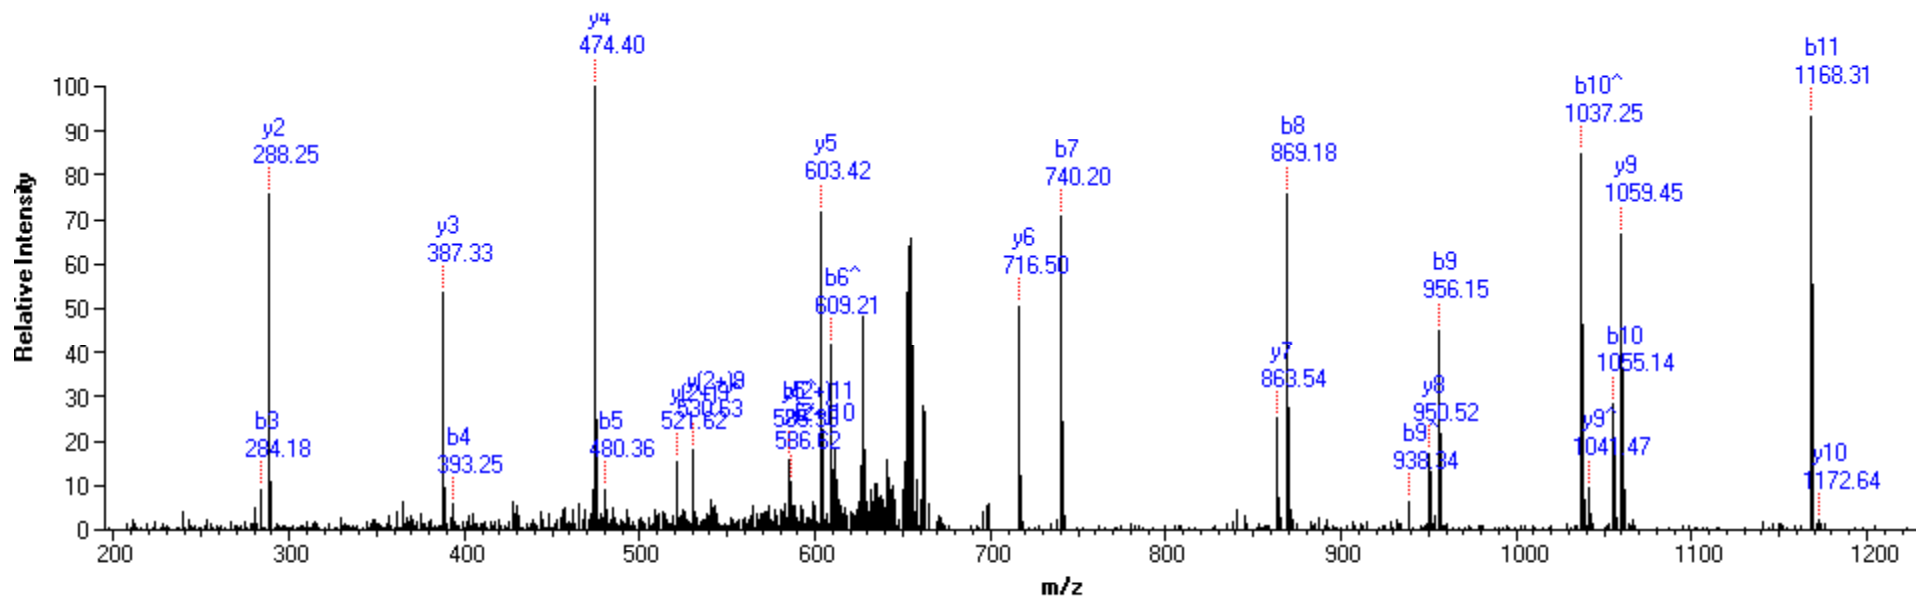

AVLK(-19)SFLESVIR

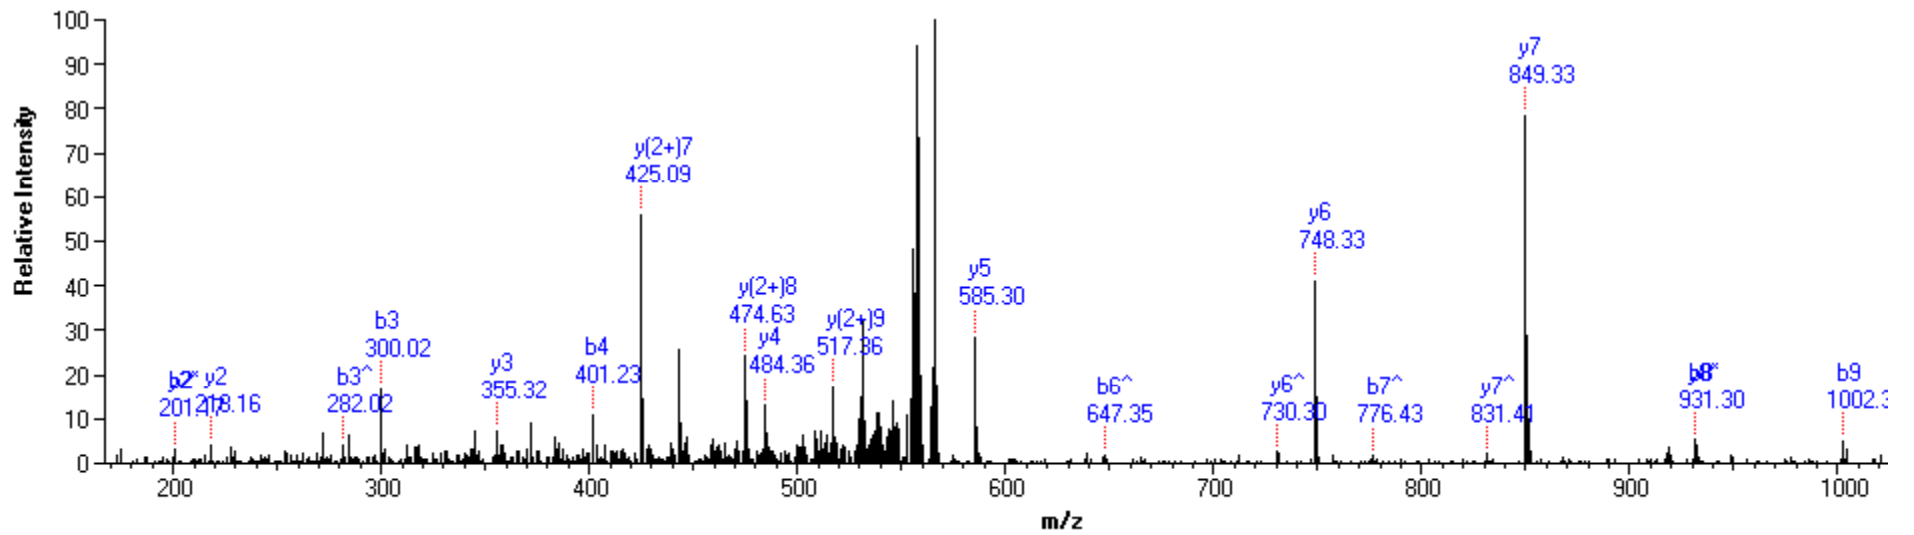

DS(-2)VTYTEHAK

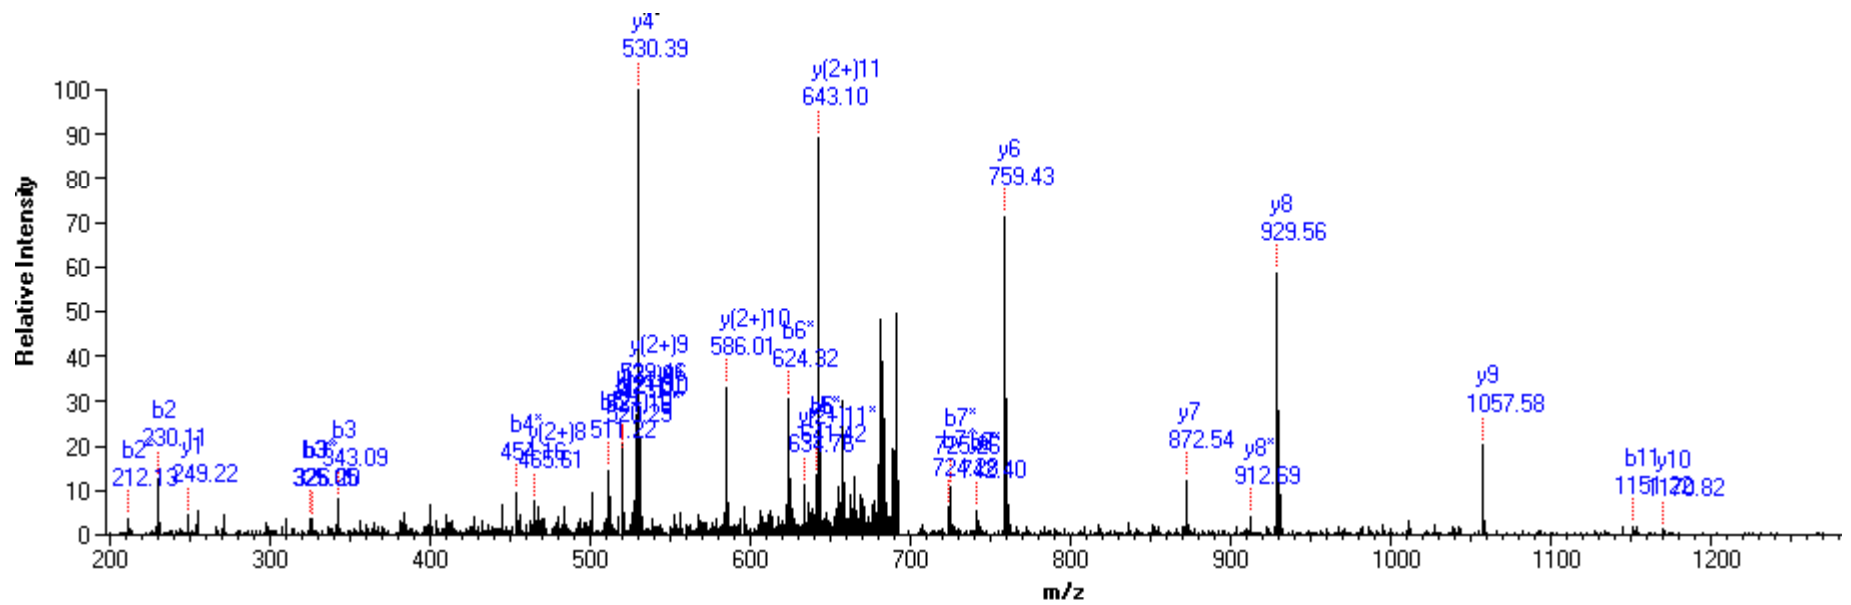

DNIQGITKPAIR(+74)



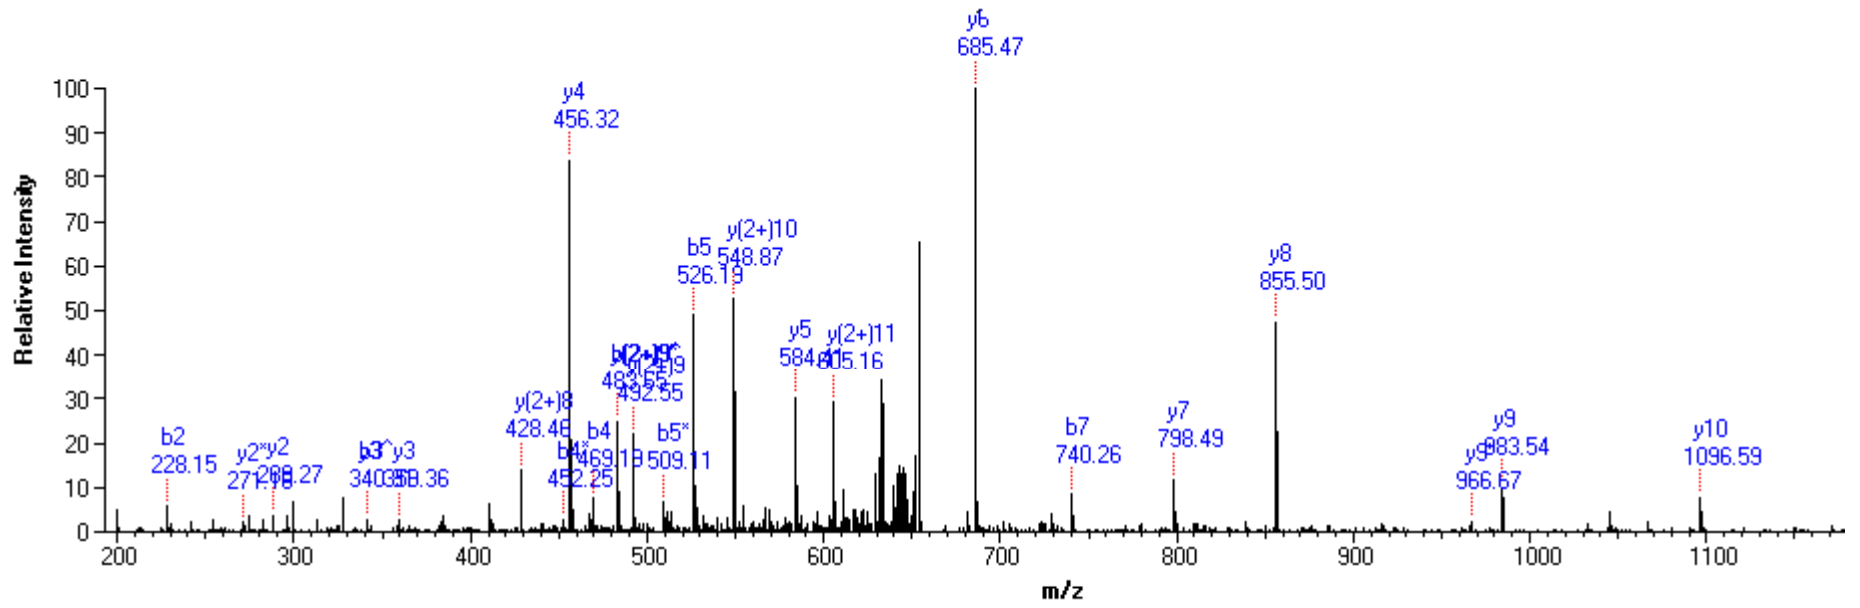

.DN(-2)IQGITKPAIR

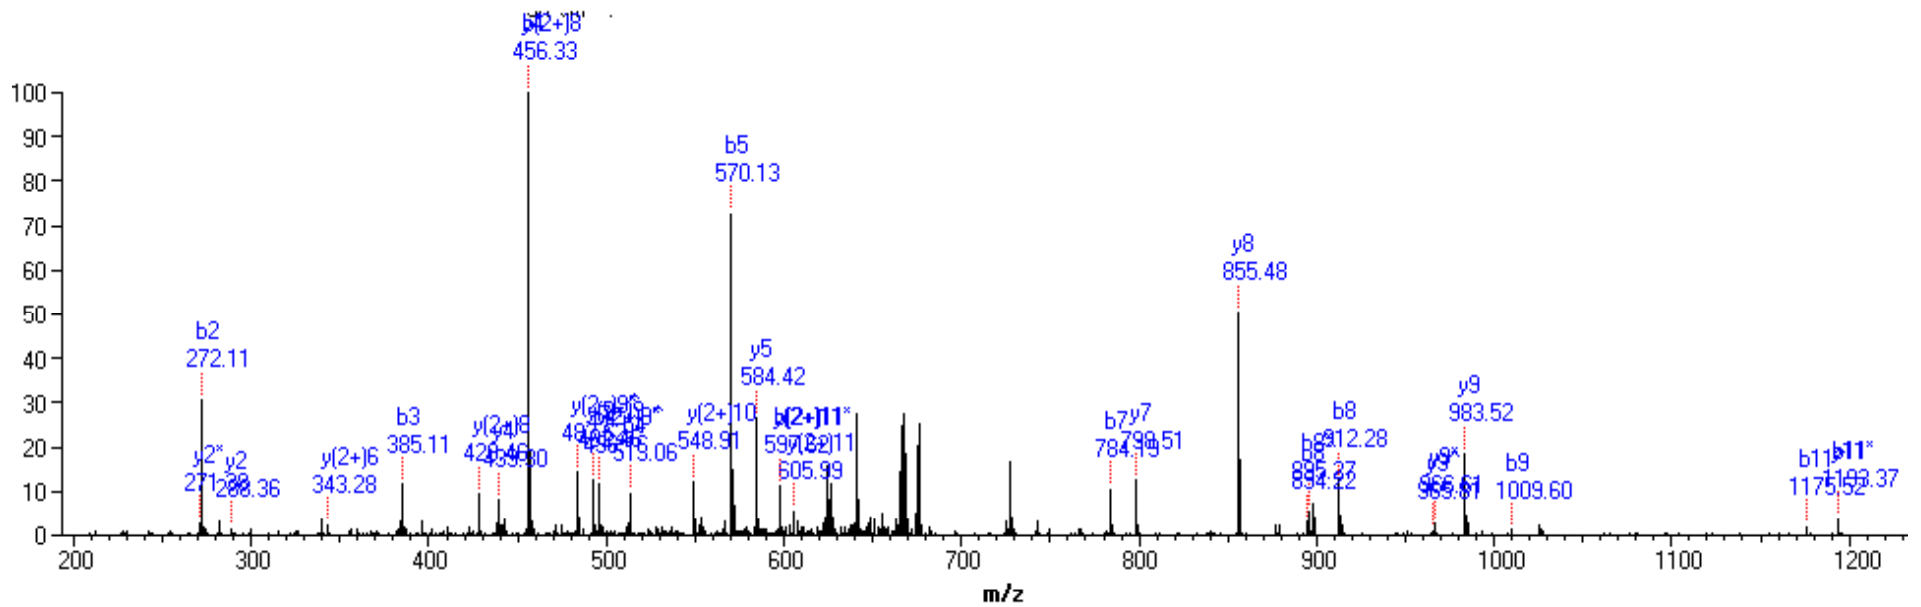

D(+42)NIQGITKPAIR

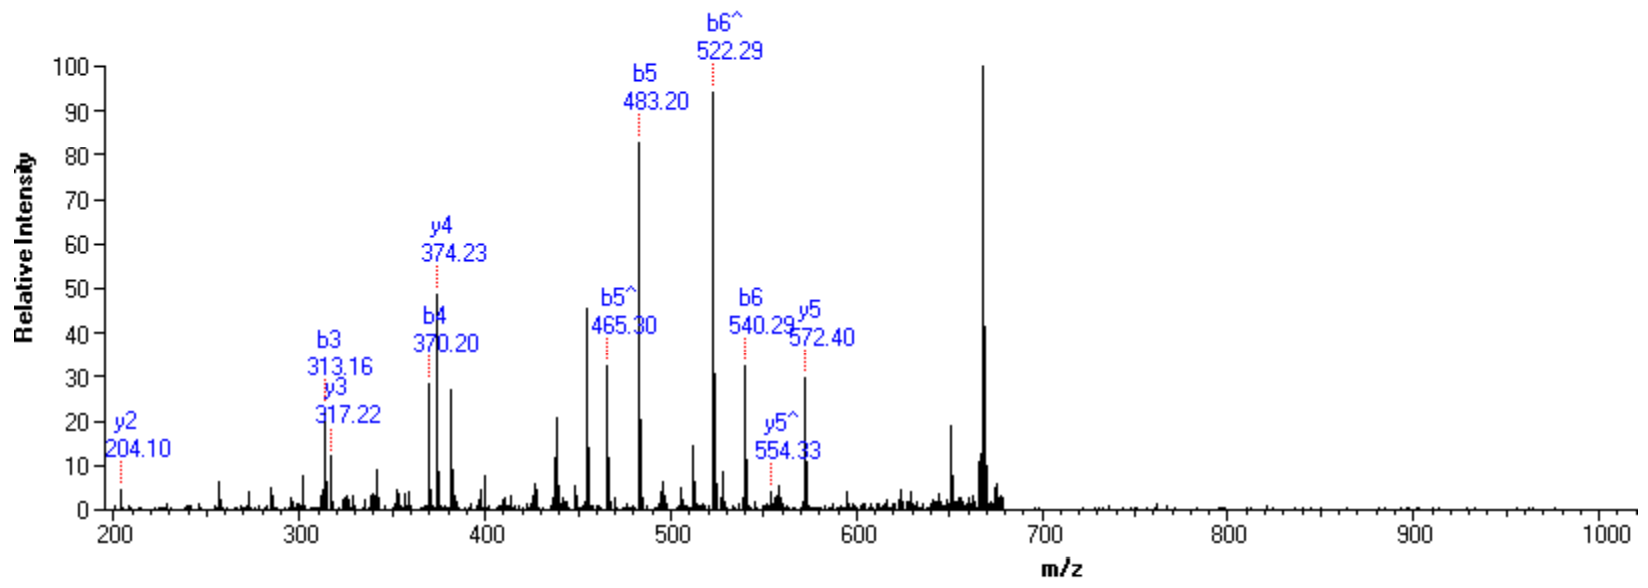

GGK(+70)GLGK

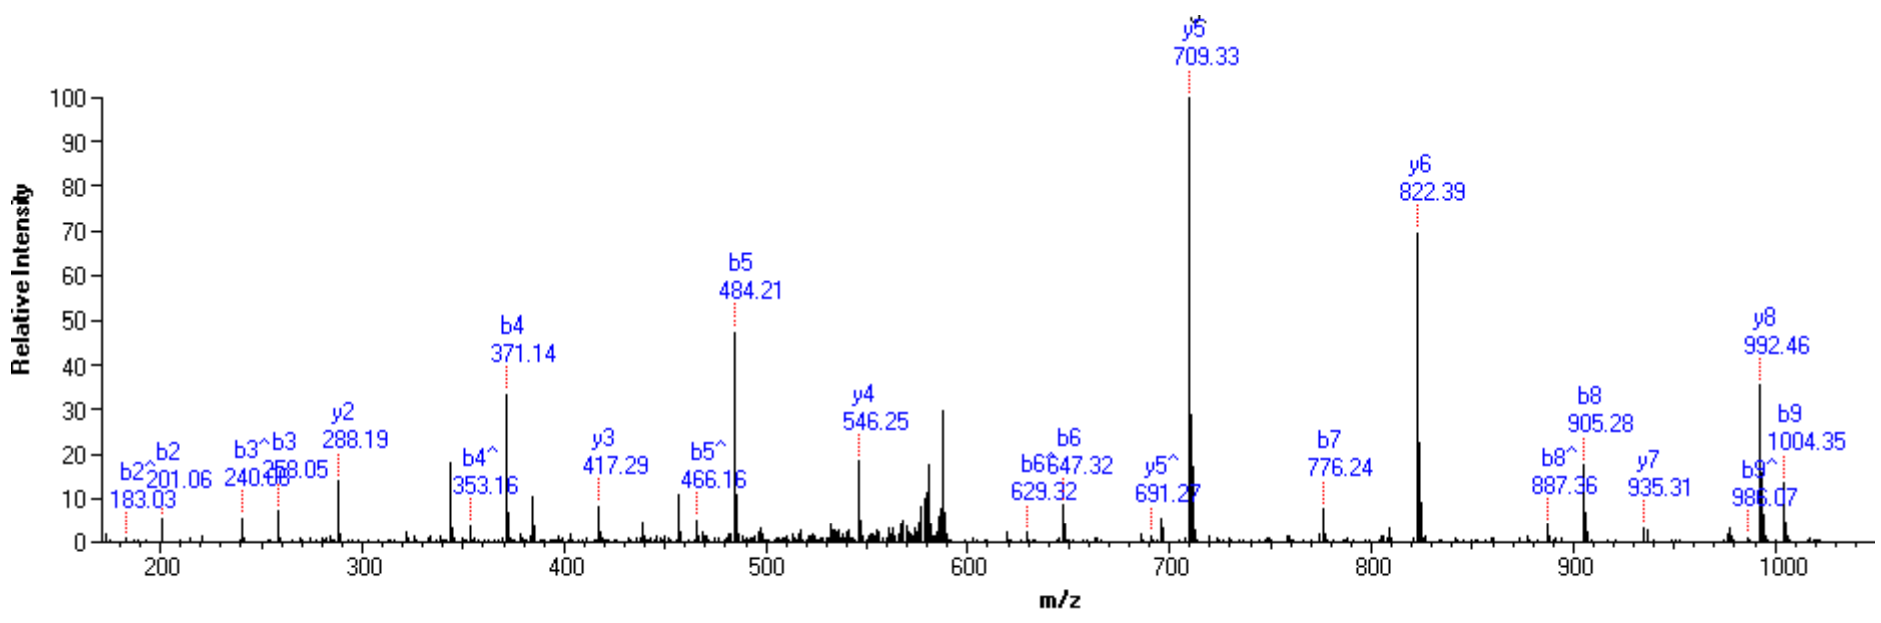

ISGLIYEEVR(+14)

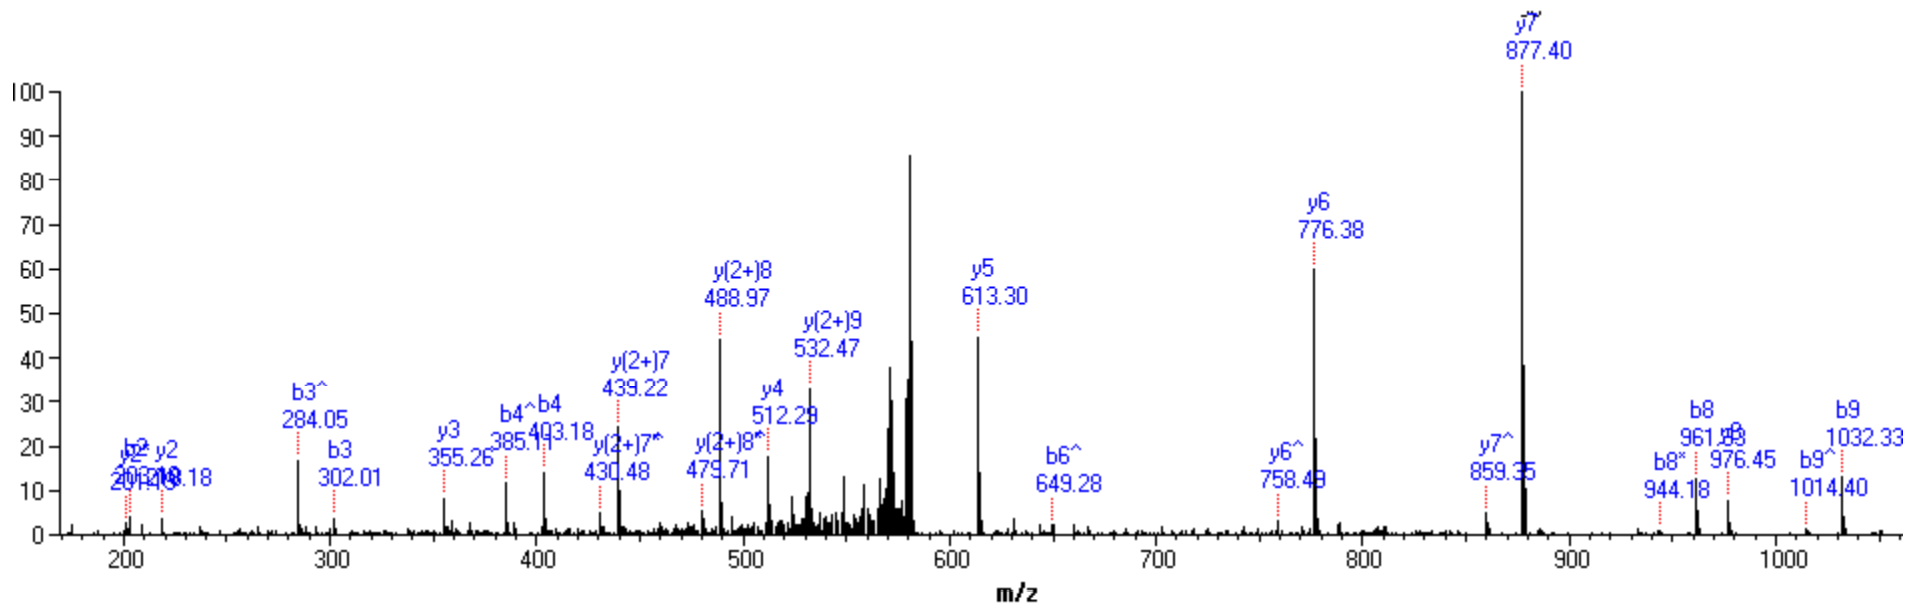

DSVTYTE(+28)HAK

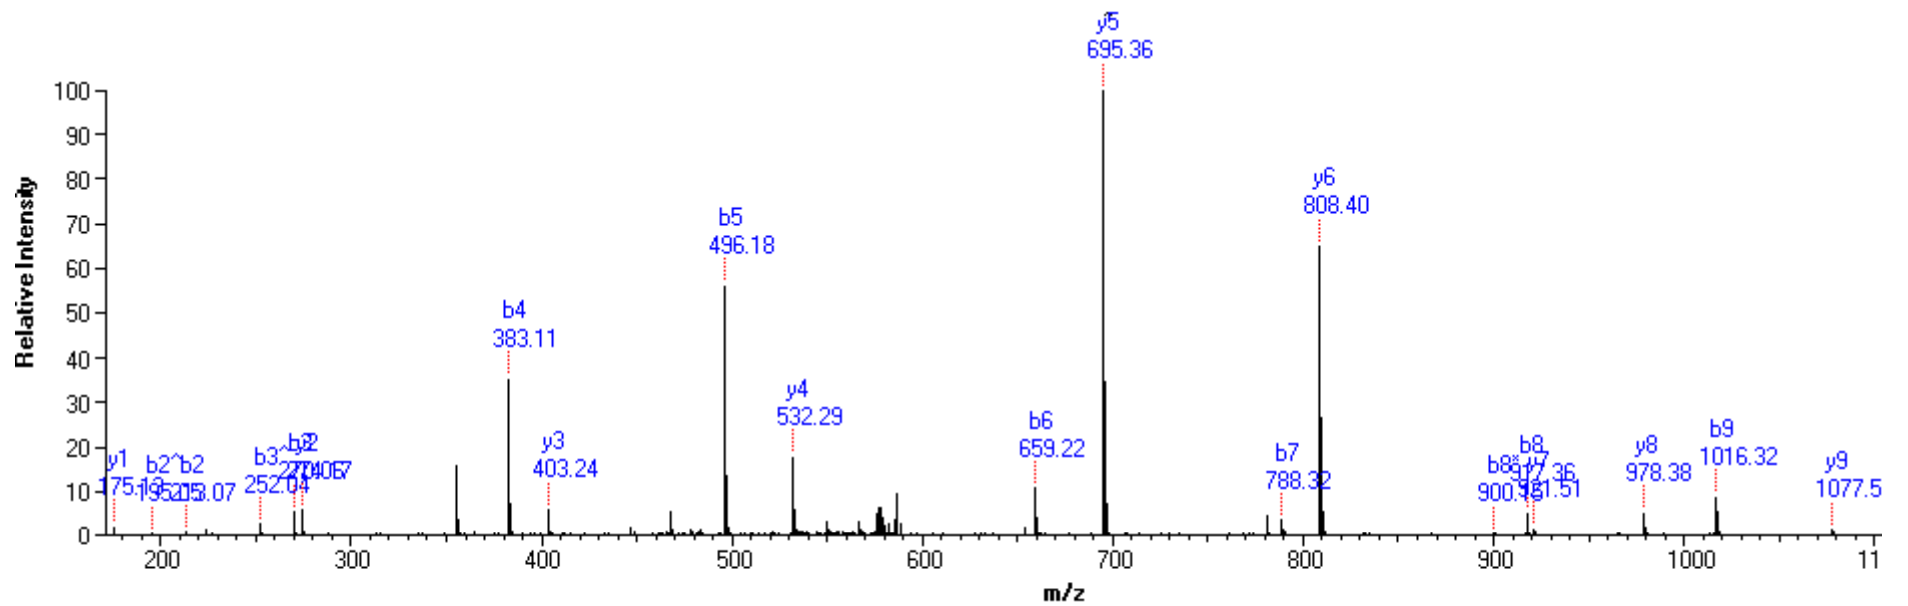

IS(+12)GLIYEEVR

**Supplemental Information S5. MS/MS of modified peptides from yeast histone H2B.**

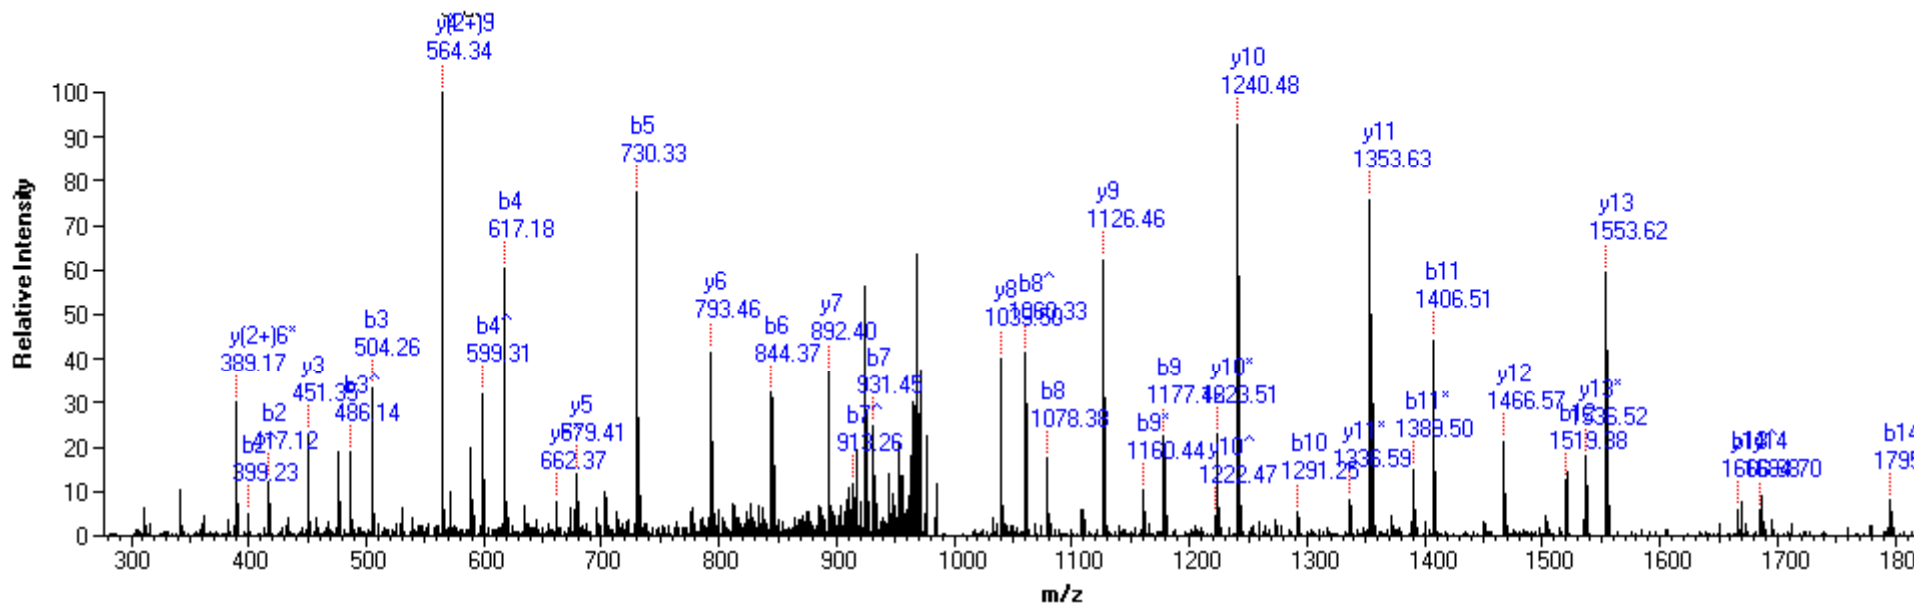

S(+198)MSILNSFVNDIFER

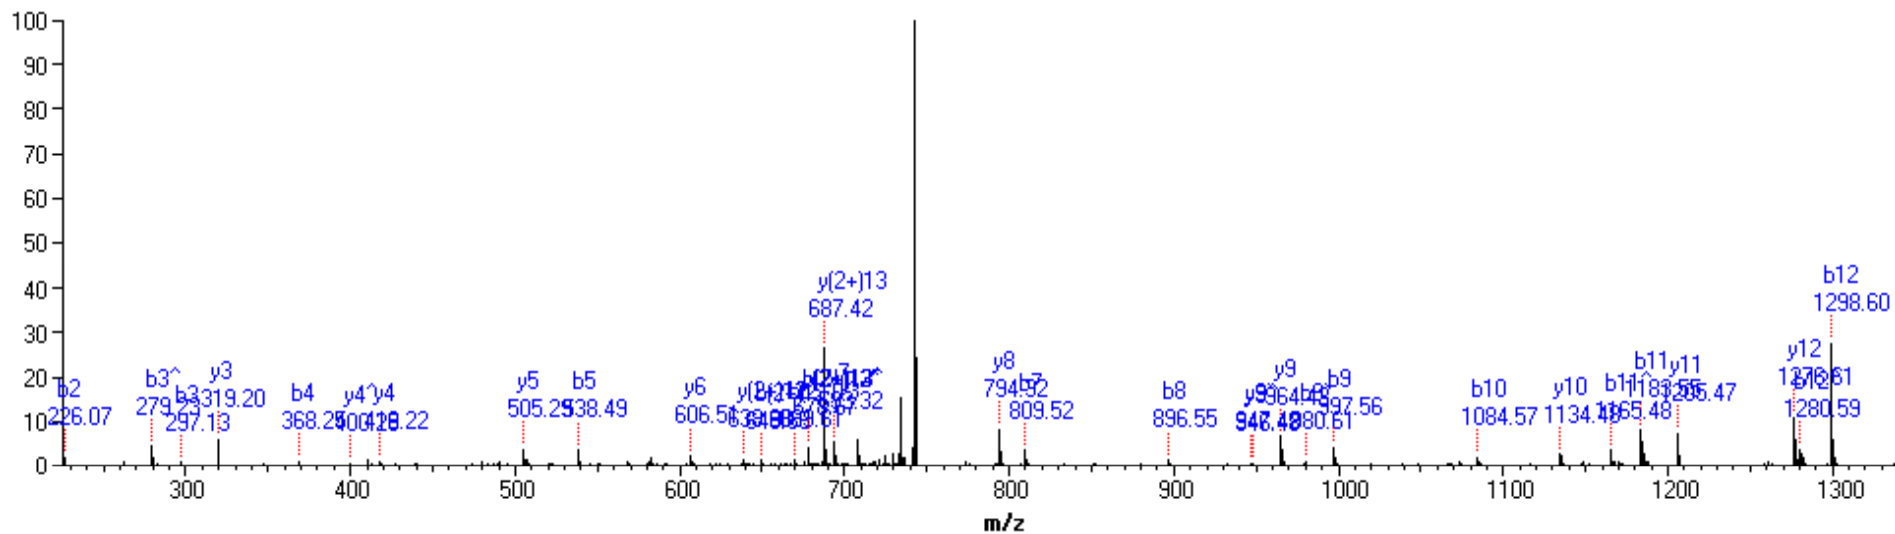

KPAAK(+42)K(+42)TSTSDGK

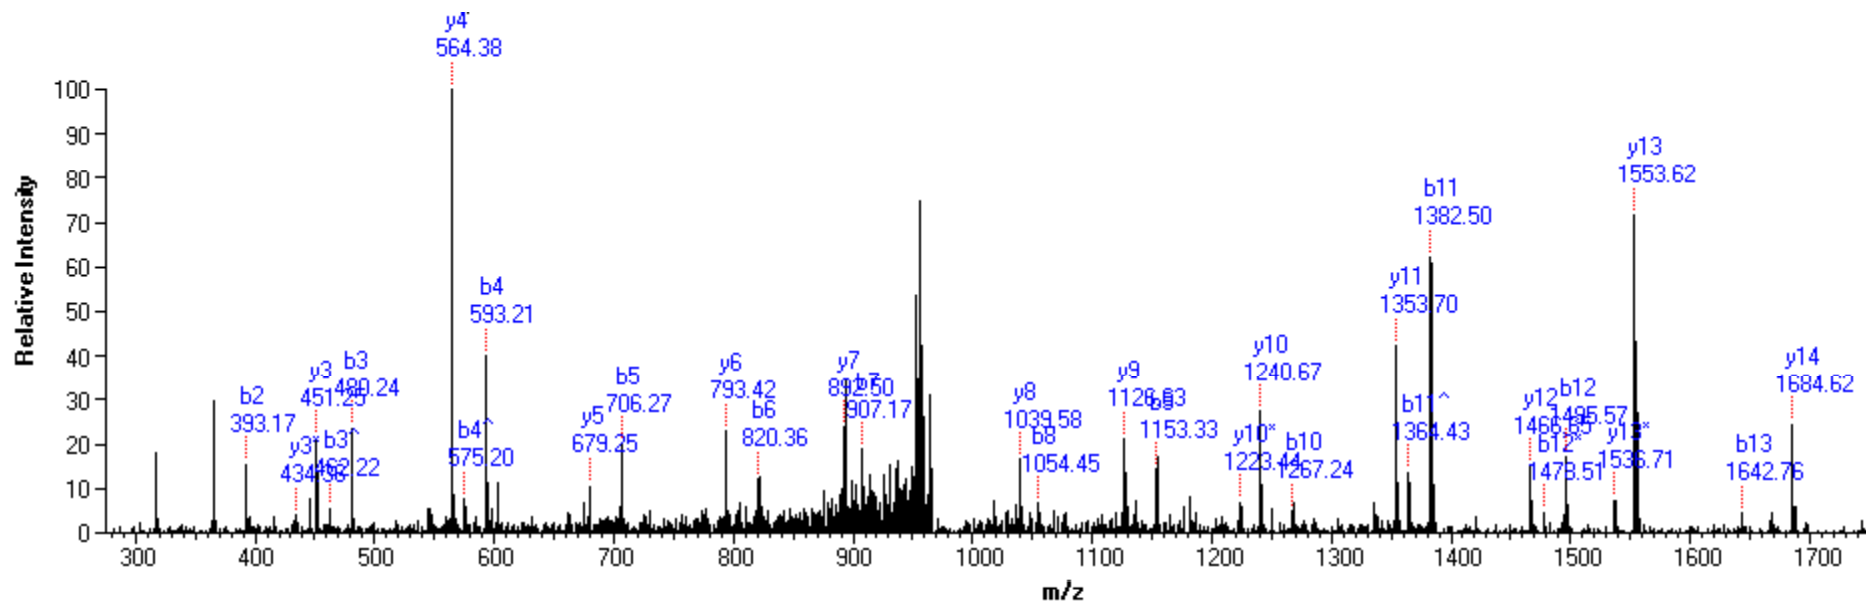

S(+174)MSILNSFVNDIFER

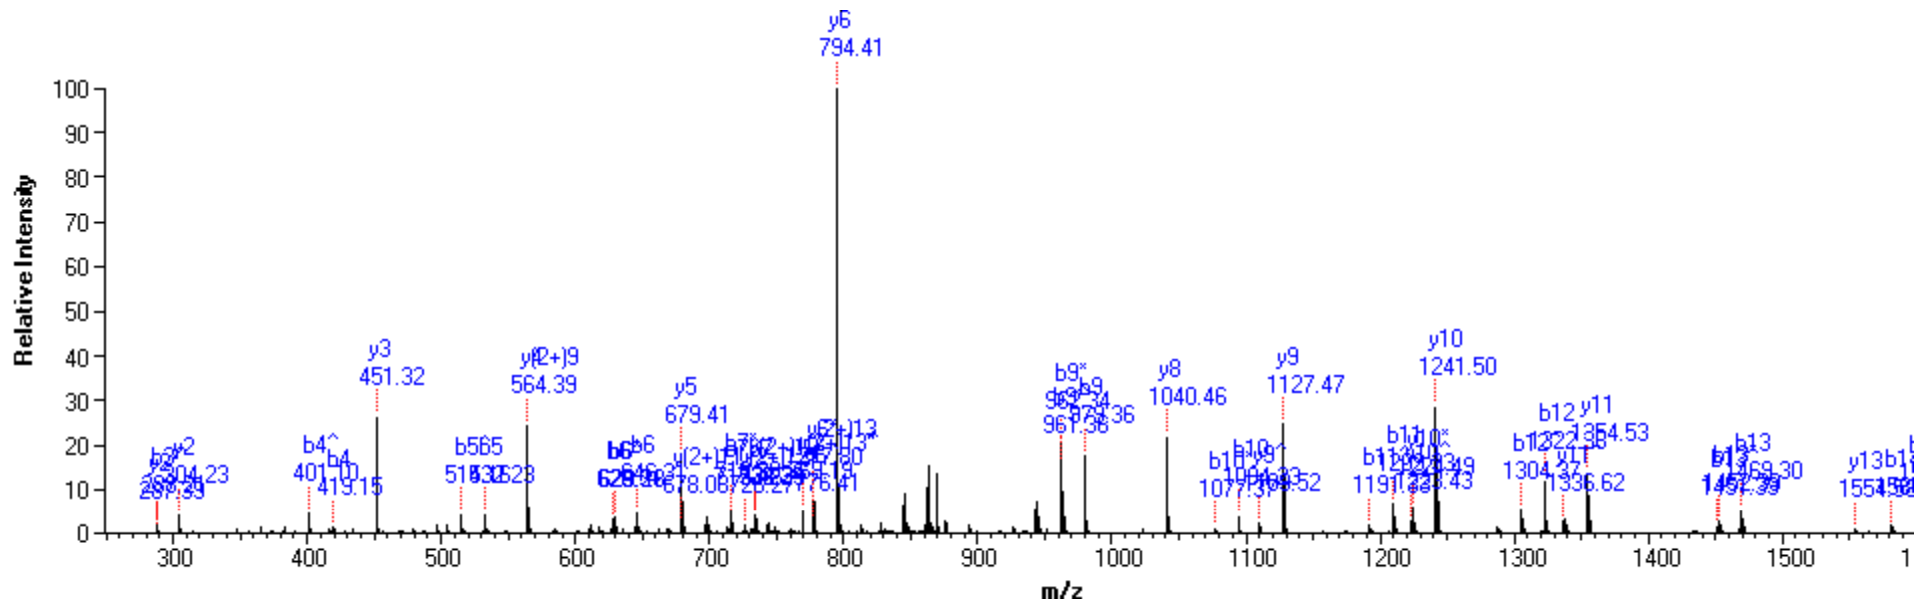

SMSILNSFVN(+1)DIFER

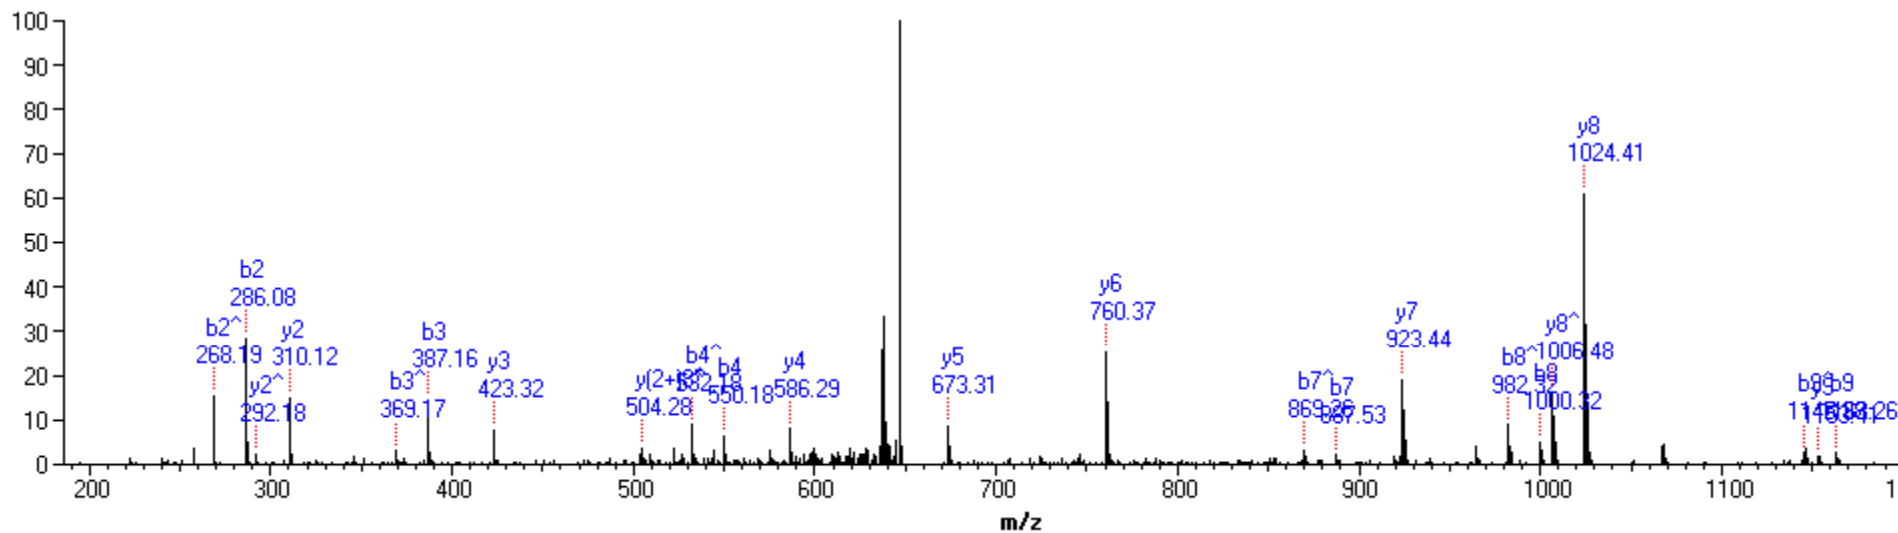

K(+28)ETYSSYIYK

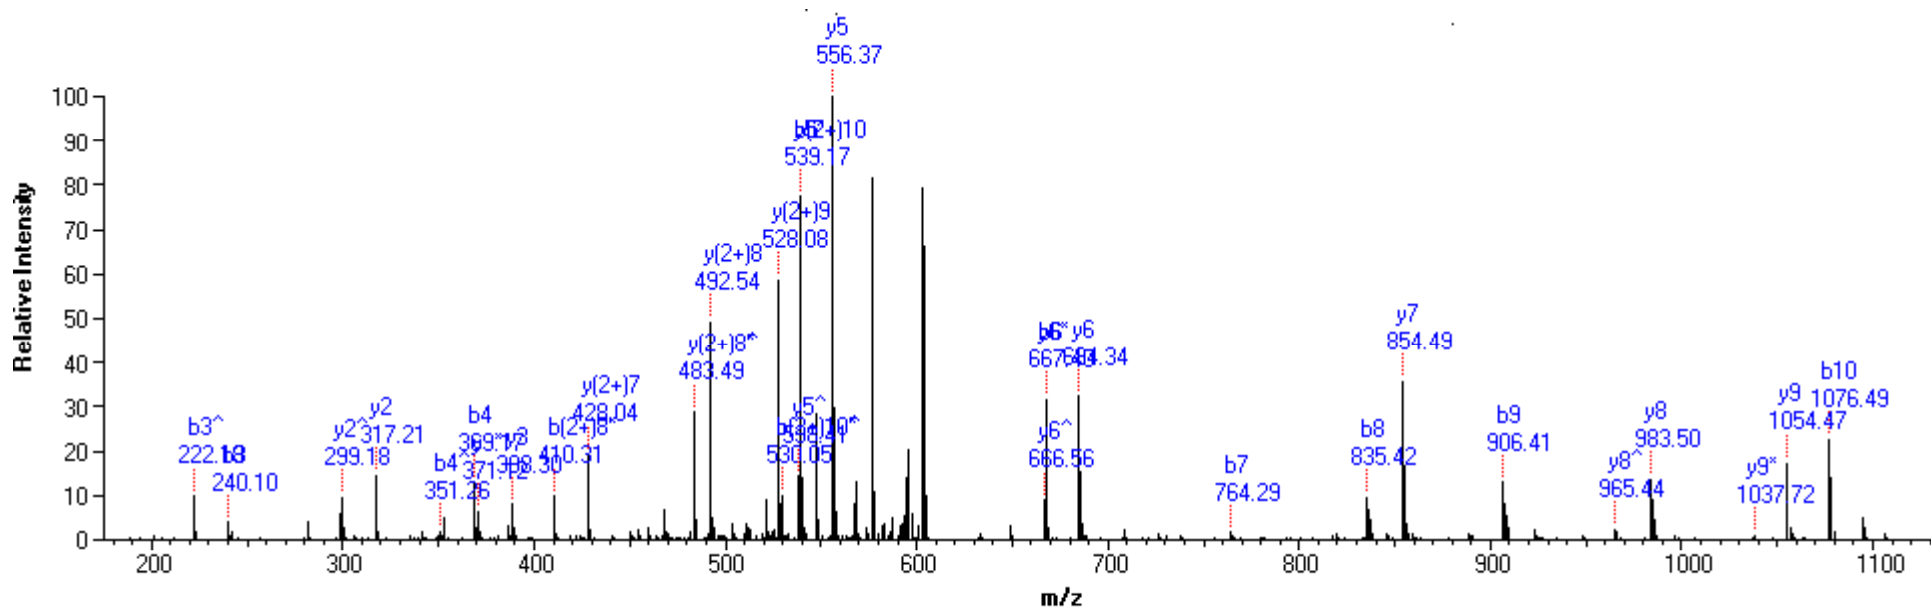

APAEK(+42)KPAAK(+42)K

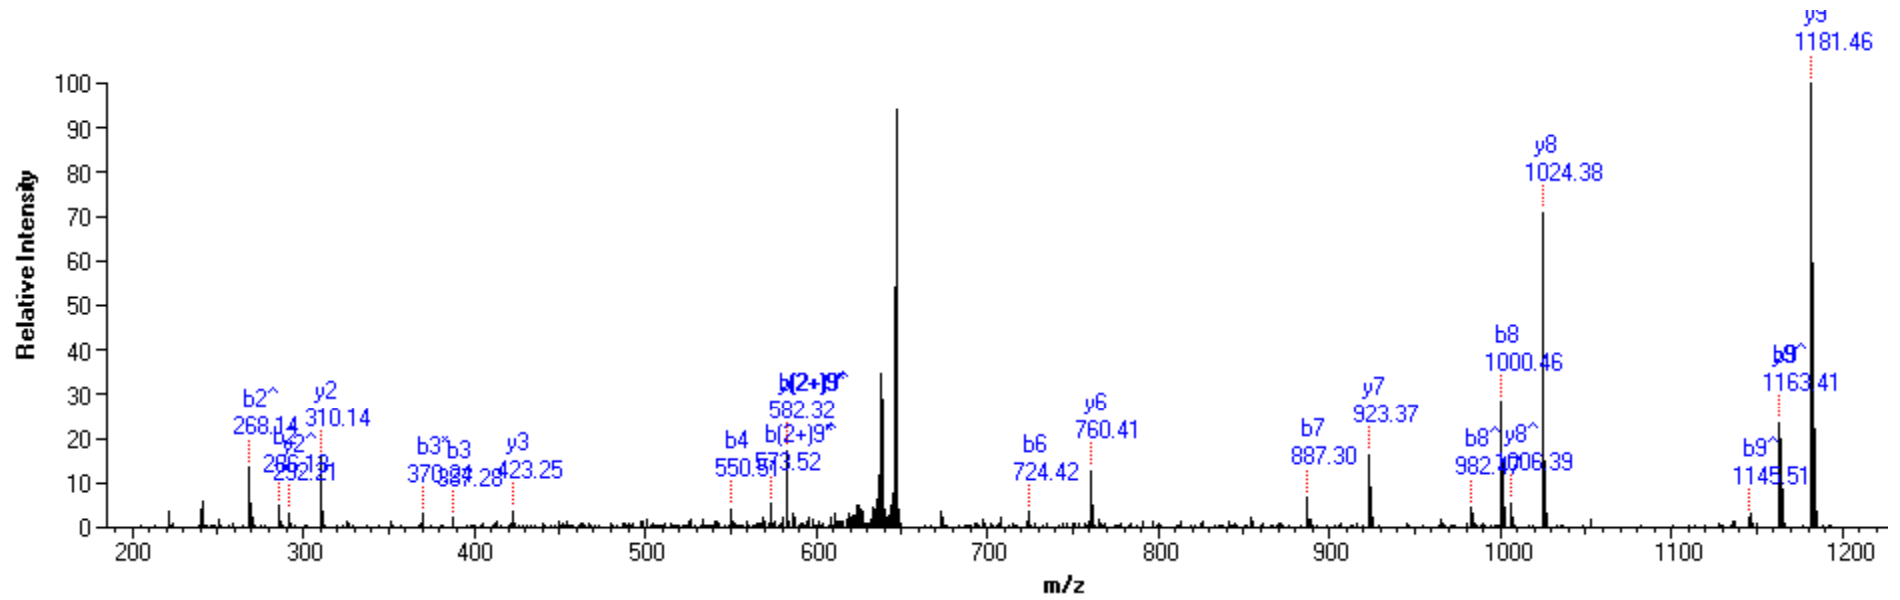

KE(+28)TYSSYIYK

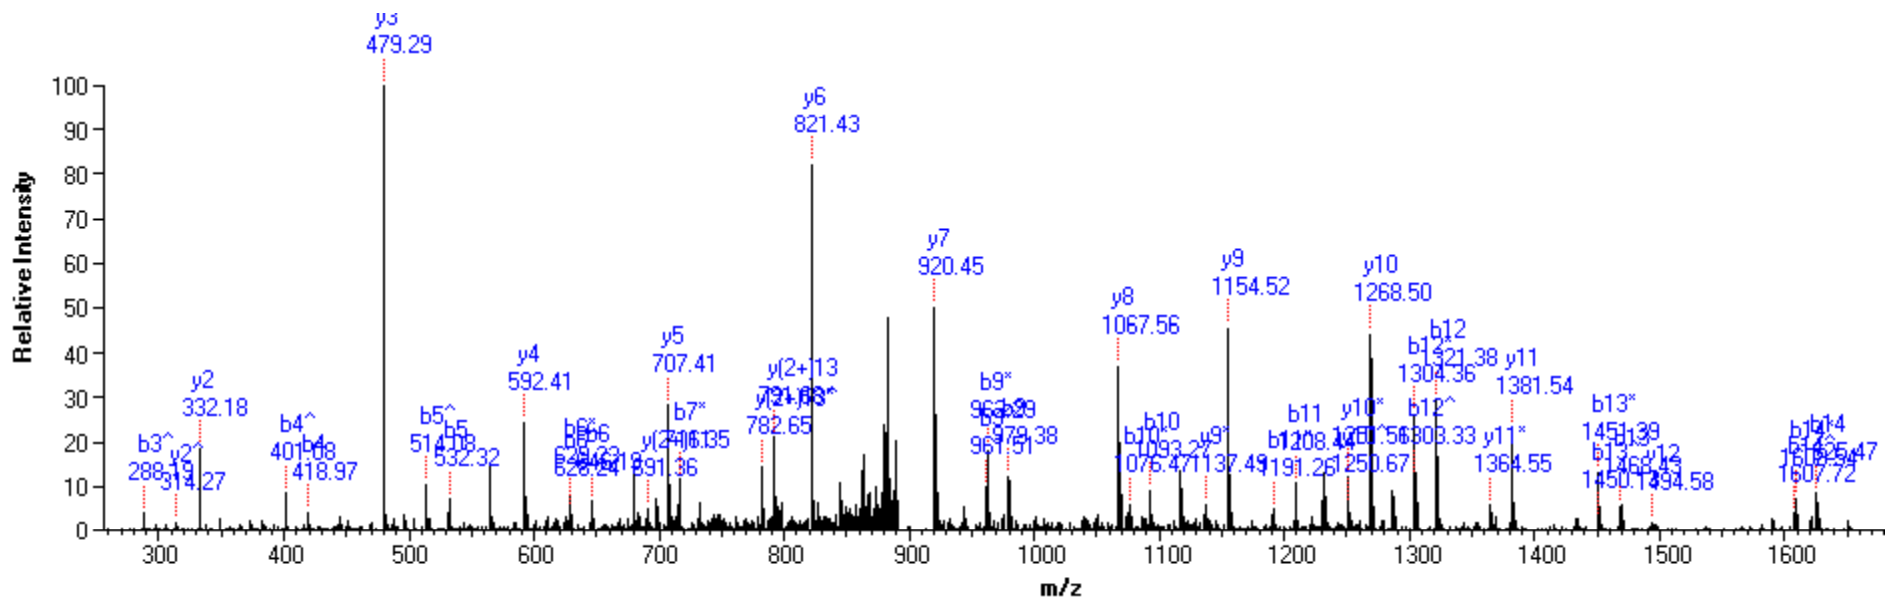

SMSILNSFVNDIFE(+28)R



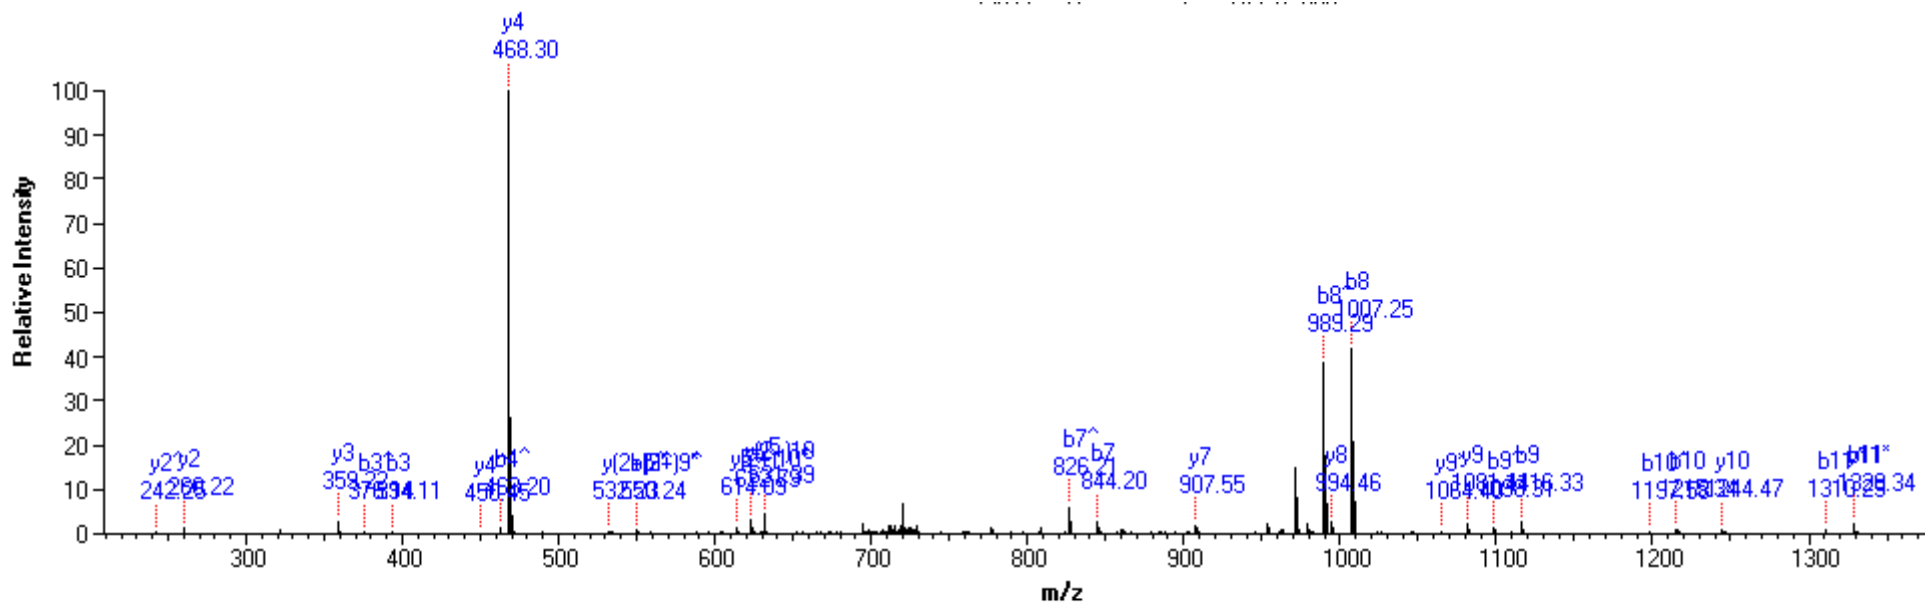

ETYSSYIYK(-19)VLK

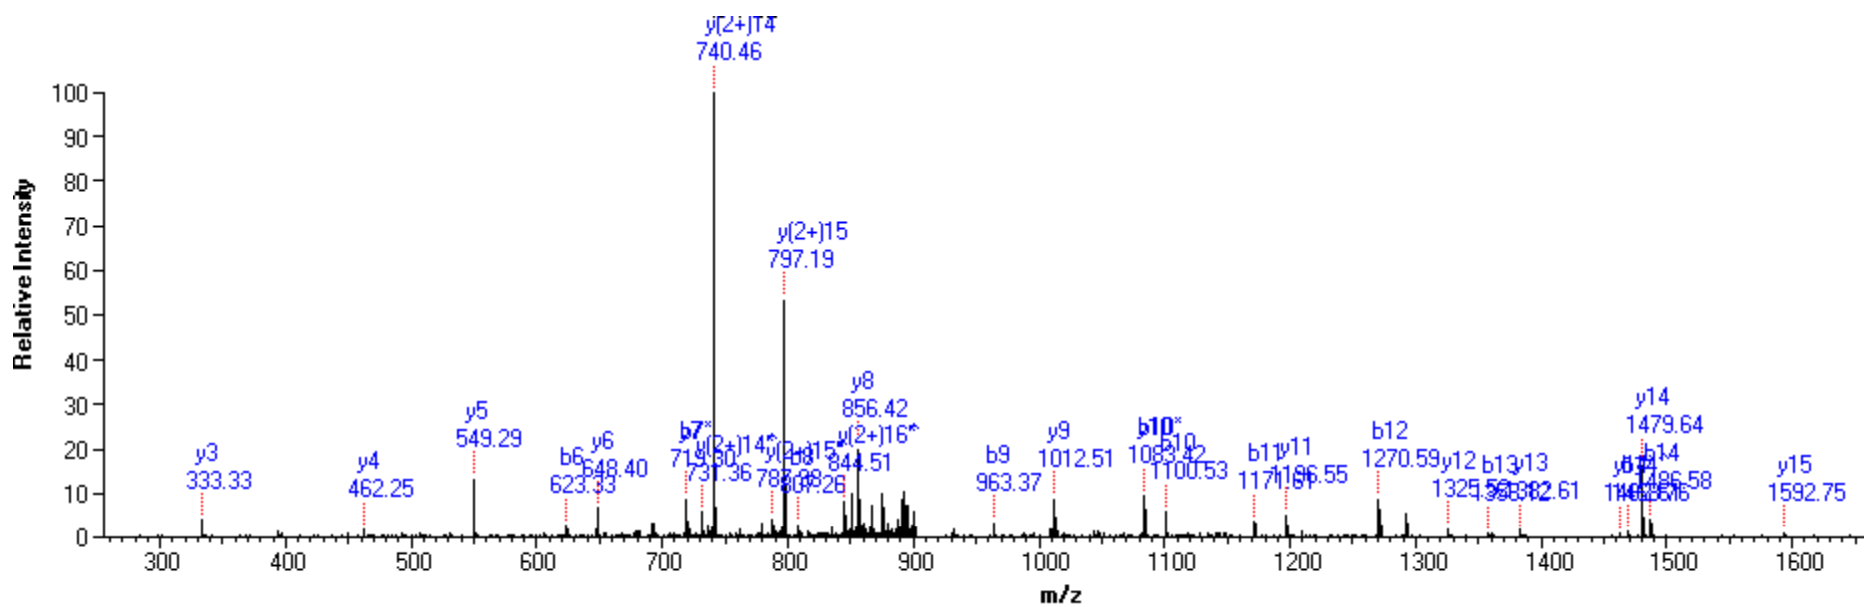

LILPGE LAK(+28)HAVSEGTR

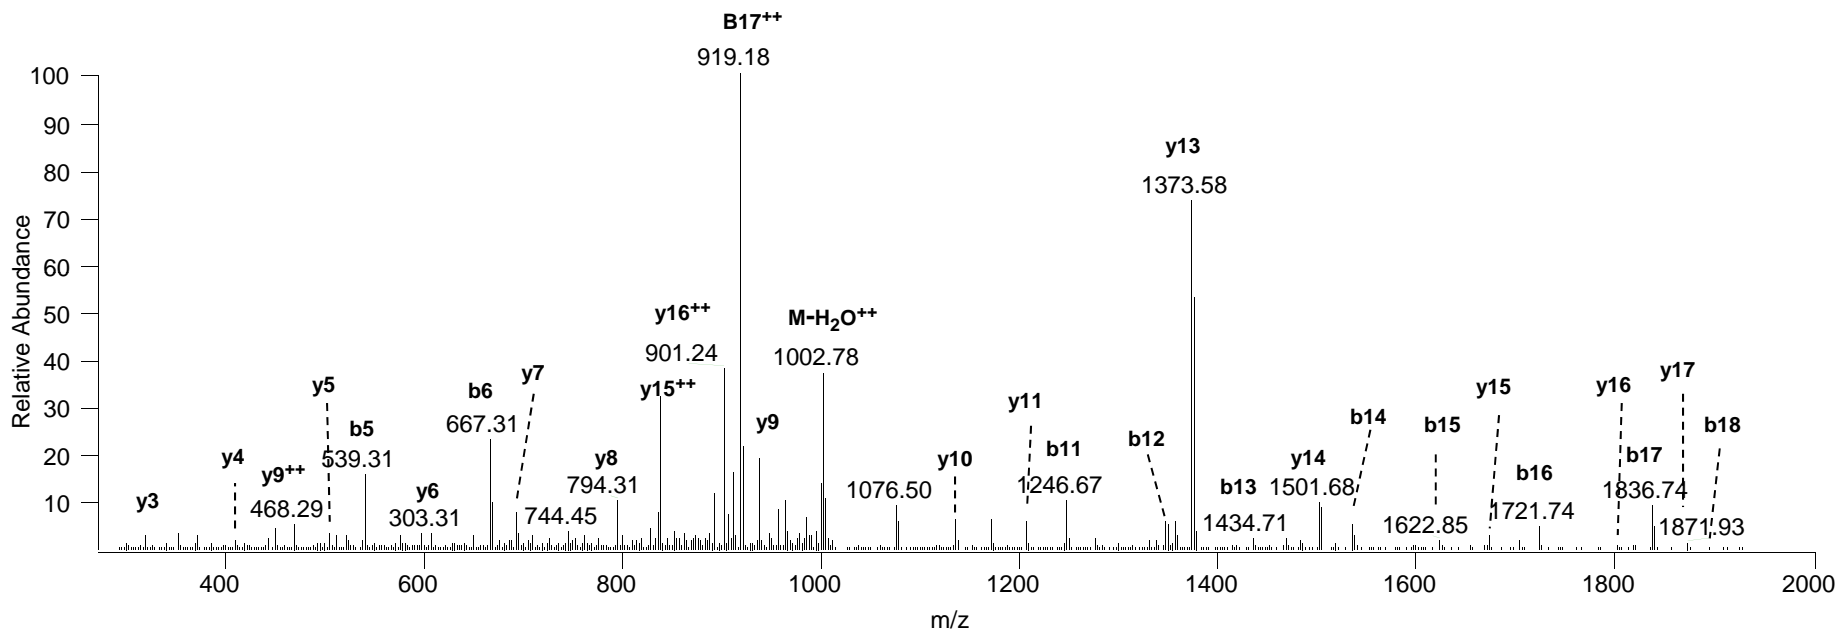

APAEK(+42)KPAAK(+70)K(+14)TSTSVDGK
